# Supplementary material for: Uncovering the mechanism of anthocyanin accumulation in a purple-leaved variety of foxtail millet ( Setaria italica ) by transcriptome analysis
Source: PeerJ journal article supplement (doi:10.7717/peerj.14099), 2022-10-03
Supplement: Supplemental_Table_1.pdf [file Supplemental_Table_1.pdf]

**Supplemental Table 1: Summary and Quality Control Items of Samples for  
RNA-sequencing**

| Sample | Clean reads | Clean bases   | GC content (%) | ≥Q30 percentage (%) |
|--------|-------------|---------------|----------------|---------------------|
| Y1     | 21,324,300  | 6,397,290,000 | 58.72%         | 94.43%              |
| Y2     | 28,070,803  | 8,421,240,900 | 58.59%         | 93.08%              |
| Y3     | 24,245,204  | 7,273,561,200 | 59.01%         | 93.54%              |
| B1     | 21,970,319  | 6,591,095,700 | 58.24%         | 92.84%              |
| B2     | 26,008,340  | 7,802,502,000 | 58.41%         | 92.98%              |
| B3     | 23,058,580  | 6,917,574,000 | 58.76%         | 93.14%              |
