# Supplementary material for: Uncovering the mechanism of anthocyanin accumulation in a purple-leaved variety of foxtail millet ( Setaria italica ) by transcriptome analysis
Source: PeerJ journal article supplement (doi:10.7717/peerj.14099), 2022-10-03
Supplement: Supplemental_Table_2.pdf [file Supplemental_Table_2.pdf]

**Supplemental Table 2: Summary for Comparative Efficiency**

| Sample | Total Reads | Mapped Reads (%)       | Uniq Mapped Reads      | Multiple Map Reads | Reads Map to '+'       | Reads Map to '-'       |
|--------|-------------|------------------------|------------------------|--------------------|------------------------|------------------------|
| Y1     | 42,648,600  | 38,823,519<br>(91.03%) | 38,164,899<br>(89.49%) | 658,620<br>(1.54%) | 19,302,972<br>(45.26%) | 19,389,585<br>(45.46%) |
| Y2     | 56,141,606  | 51,370,743<br>(91.50%) | 50,404,721<br>(89.78%) | 966,022<br>(1.72%) | 25,552,998<br>(45.52%) | 25,666,496<br>(45.72%) |
| Y3     | 48,490,408  | 43,823,831<br>(90.38%) | 43,047,230<br>(88.77%) | 776,601<br>(1.60%) | 21,810,544<br>(44.98%) | 21,888,593<br>(45.14%) |
| B1     | 43,940,638  | 39,072,277<br>(88.92%) | 38,449,360<br>(87.50%) | 622,917<br>(1.42%) | 19,441,124<br>(44.24%) | 19,530,634<br>(44.45%) |
| B2     | 52,016,680  | 46,801,329<br>(89.97%) | 46,034,830<br>(88.50%) | 766,499<br>(1.47%) | 23,291,964<br>(44.78%) | 23,391,083<br>(44.97%) |
| B3     | 46,117,160  | 40,605,203<br>(88.05%) | 39,948,835<br>(86.62%) | 656,368<br>(1.42%) | 20,210,469<br>(43.82%) | 20,297,111<br>(44.01%) |
