# Supplementary material for: Uncovering the mechanism of anthocyanin accumulation in a purple-leaved variety of foxtail millet ( Setaria italica ) by transcriptome analysis
Source: PeerJ journal article supplement (doi:10.7717/peerj.14099), 2022-10-03
Supplement: Supplemental_Table_3.pdf [file Supplemental_Table_3.pdf]

**Supplemental Table 3: Primer for qRT-PCR Used in This Study**

| Genes         | Accession      | Primer (5'-3')                                      | Amplicon length (bp) |
|---------------|----------------|-----------------------------------------------------|----------------------|
| <i>PAL</i>    | Seita.1G240200 | F:TCCCGCTGTACCGCTTCGT<br>R:CCCACCTCCTTGAGGCACTCG    | 153                  |
| <i>4CL</i>    | Seita.9G537200 | F:ATTTACAATCAAGGAAGGGTGG<br>R:AGGAAACGGAATAACAACAGC | 190                  |
| <i>DFR</i>    | Seita.5G237900 | F:ATCCTCAAGCAGGTGCAGTTCG<br>R:CCGTGGATGGTGGAGTCGTG  | 122                  |
| <i>LDOX-1</i> | Seita.4G054600 | F:GGAGCCTATCCCAATCAT<br>R:CGCTTGCCGTCTATCAG         | 213                  |
| <i>LDOX-2</i> | Seita.1G000700 | F:CACGAACACGACGACGACCTCC<br>R:GGCACGCCGTTGTGGATGA   | 137                  |
| <i>UFGT</i>   | Seita.3G190000 | F:TTTCCAAGCCCAGATATACGG<br>R:GAAAGTGTTGACGGCGATTC   | 138                  |
| <i>5GT</i>    | Seita.2G324600 | F:TCTGTACGCCGAGCAGCACC<br>R:TTCGGTCTCGCCCATCAGG     | 154                  |
| <i>GT</i>     | Seita.5G239500 | F:TTCGGCACGCTGTCCCATT<br>R:ACCCGTCGGGCAACCACTCT     | 133                  |
| <i>AT</i>     | Seita.9G002300 | F:CCCTCCCGCTAACCTTCTTTG<br>R:TCGTAGGAGACGAGGTCATCCA | 280                  |
| <i>Actin</i>  | Seita.5G464000 | F:TGCTCAGTGGAGGCTCAACA<br>R:CCAGACACTGTACTTGCGCTC   | 128                  |
