# Supplementary material for: Uncovering the mechanism of anthocyanin accumulation in a purple-leaved variety of foxtail millet (Setaria italica) by transcriptome analysis
Source: PeerJ. 2022 Oct 3;10:e14099. doi: 10.7717/peerj.14099 (PMC9536322; doi:10.7717/peerj.14099)
Supplement: Table S4 [file peerj-10-14099-s007.xlsx]

## Sheet: ref_trans_full_table
#ID	gene_name	Y1_FPKM	Y1_count	Y2_FPKM	Y2_count	Y3_FPKM	Y3_count	B1_FPKM	B1_count	B2_FPKM	B2_count	B3_FPKM	B3_count	B1_B2_B3_vs_Y1_Y2_Y3_DESeq_FDR	B1_B2_B3_vs_Y1_Y2_Y3_DESeq_log2FC	B1_B2_B3_vs_Y1_Y2_Y3_DESeq_(FDR_0.01_FC_2)_regulated	COG_class	COG_class_annotation	GO_annotation	KEGG_annotation	KEGG_pathway_annotation	KOG_class	KOG_class_annotation	Pfam_annotation	Swiss_Prot_annotation	eggNOG_class	eggNOG_class_annotation	NR_annotation
Seita.1G000100	Seita.1G000100	0.690559	65	1.44879	255	1.83855	276	0.910646	122	0.607854	98	2.10757	293	0.999228	0.238691	normal	[RTKL]	General function prediction only;; Signal transduction mechanisms;; Transcription;; Replication, recombination and repair	Molecular Function: protein serine/threonine kinase activity (GO:0004674);; Molecular Function: ATP binding (GO:0005524);; Biological Process: protein phosphorylation (GO:0006468);; Cellular Component: membrane (GO:0016020);; Cellular Component: cytoplasmic membrane-bounded vesicle (GO:0016023);;	--	--	--	--	Leucine rich repeat;; Leucine Rich repeats (2 copies);; Protein tyrosine kinase;; Protein kinase domain;; Leucine Rich Repeat;; Leucine Rich repeat;; Leucine rich repeat N-terminal domain	Probable LRR receptor-like serine/threonine-protein kinase At3g47570 (Precursor) GN=At3g47570 OS=Arabidopsis thaliana (Mouse-ear cress) PE=2 SV=1	T	Signal transduction mechanisms	PREDICTED: LRR receptor-like serine/threonine-protein kinase GSO1-like isoform X1 [Setaria italica]
Seita.1G000200	Seita.1G000200	661.553	26689	558.023	29667	588.806	26755	448.612	18162	508.861	24645	378.514	15909	0.940147	0.516336	normal	--	--	Biological Process: maltose metabolic process (GO:0000023);; Biological Process: pentose-phosphate shunt (GO:0006098);; Cellular Component: chloroplast thylakoid membrane (GO:0009535);; Biological Process: chloroplast relocation (GO:0009902);; Biological Process: thylakoid membrane organization (GO:0010027);; Biological Process: cytochrome b6f complex assembly (GO:0010190);; Biological Process: p…	--	--	--	--	Protein of unknown function (DUF3007)	--	S	Function unknown	PREDICTED: uncharacterized protein DDB_G0271670-like [Setaria italica]
Seita.1G000300	Seita.1G000300	80.4417	7142	21.2199	2484	25.4545	2545	74.4489	6655	58.4126	6254	56.8266	5285	0.804338	-0.632242	normal	--	--	--	--	--	[A]	RNA processing and modification	RING-variant domain	--	A	RNA processing and modification	PREDICTED: uncharacterized protein LOC101753831 isoform X1 [Setaria italica]
Seita.1G000400	Seita.1G000400	77.9425	7599	49.8572	6408	47.5223	5276	70.759	7025	57.1888	6849	82.0455	8546	0.993235	-0.24175	normal	[OC]	Posttranslational modification, protein turnover, chaperones;; Energy production and conversion	Molecular Function: protein disulfide isomerase activity (GO:0003756);; Cellular Component: mitochondrion (GO:0005739);; Cellular Component: endoplasmic reticulum lumen (GO:0005788);; Cellular Component: plasma membrane (GO:0005886);; Biological Process: protein folding (GO:0006457);; Biological Process: glycerol ether metabolic process (GO:0006662);; Biological Process: response to oxidative str…	K09580|0|sita:101753416|protein disulfide isomerase-like 1-4-like; K09580 protein disulfide-isomerase A1 [EC:5.3.4.1] (A)	Protein processing in endoplasmic reticulum (ko04141)	[O]	Posttranslational modification, protein turnover, chaperones	Thioredoxin;; Thioredoxin-like domain;; Thioredoxin-like;; Thioredoxin-like domain;; Thioredoxin-like;; Calsequestrin	Protein disulfide isomerase-like 1-4 (Precursor) OS=Oryza sativa subsp. japonica (Rice) PE=2 SV=1	O	Posttranslational modification, protein turnover, chaperones	PREDICTED: protein disulfide isomerase-like 1-4-like [Setaria italica]
Seita.1G000500	Seita.1G000500	39.6062	2835	30.5328	3058	31.0659	2665	38.6618	2928	37.4286	3399	37.3487	2855	0.999228	-0.0989648	normal	[R]	General function prediction only	Cellular Component: cytosol (GO:0005829);; Biological Process: response to cadmium ion (GO:0046686);;	K09560|3.8943e-143|sita:101772198|FAM10 family protein At4g22670-like; K09560 suppressor of tumorigenicity protein 13 (A)	--	[OT]	Posttranslational modification, protein turnover, chaperones;; Signal transduction mechanisms	TPR repeat;; Tetratricopeptide repeat;; Tetratricopeptide repeat;; Tetratricopeptide repeat;; Tetratricopeptide repeat;; Tetratricopeptide repeat;; Tetratricopeptide repeat	FAM10 family protein At4g22670 GN=At4g22670 OS=Arabidopsis thaliana (Mouse-ear cress) PE=1 SV=1	1083		PREDICTED: FAM10 family protein At4g22670-like [Setaria italica]
Seita.1G000600	Seita.1G000600	0	0	0	0	0	0	0	0	0	0	0	0	--	--	--	--	--	--	--	--	--	--	Late embryogenesis abundant protein	--	S	Function unknown	PREDICTED: uncharacterized protein LOC101754499 [Setaria italica]
Seita.1G000700	Seita.1G000700	3.02841	137	1.07995	65	0.954554	49	581.184	26321	678.483	36759	816.419	38385	4.14938e-22	-8.7067	down	[R]	General function prediction only	Molecular Function: iron ion binding (GO:0005506);; Biological Process: proteolysis (GO:0006508);; Biological Process: vacuole organization (GO:0007033);; Molecular Function: metallopeptidase activity (GO:0008237);; Biological Process: response to wounding (GO:0009611);; Biological Process: anthocyanin-containing compound biosynthetic process (GO:0009718);; Biological Process: response to jasmoni…	K05277|0|sita:101754899|leucoanthocyanidin dioxygenase-like; K05277 leucoanthocyanidin dioxygenase [EC:1.14.11.19] (A)	Flavonoid biosynthesis (ko00941)	[QR]	Secondary metabolites biosynthesis, transport and catabolism;; General function prediction only	non-haem dioxygenase in morphine synthesis N-terminal;; 2OG-Fe(II) oxygenase superfamily	Leucoanthocyanidin dioxygenase GN=A2 OS=Zea mays (Maize) PE=2 SV=1	H	Coenzyme transport and metabolism	PREDICTED: leucoanthocyanidin dioxygenase-like [Setaria italica]
Seita.1G000800	Seita.1G000800	1.57659	62	0.810978	42	0.343063	16	1.04981	42	0.964596	46	1.10186	45	0.999228	-0.207326	normal	--	--	--	--	--	--	--	Protein of unknown function (DUF740)	--	S	Function unknown	PREDICTED: uncharacterized protein LOC101755301 [Setaria italica]
Seita.1G000900	Seita.1G000900	0	0	0	0	0	0	0	0	0	0	0	0	--	--	--	--	--	--	--	--	--	--	C2H2-type zinc finger	Transcriptional regulator SUPERMAN GN=K14B15.1 OS=Arabidopsis thaliana (Mouse-ear cress) PE=1 SV=1	R	General function prediction only	PREDICTED: transcriptional regulator SUPERMAN-like [Setaria italica]
Seita.1G001000	Seita.1G001000	0	0	0	0	0	0	0	0	0	0	0	0	--	--	--	--	--	--	--	--	--	--	--	--	S	Function unknown	hypothetical protein SORBIDRAFT_04g000280 [Sorghum bicolor]
Seita.1G001100	Seita.1G001100	14.7934	1401	5.38958	668	4.13966	438	11.4394	1082	9.81547	1098	5.42129	538	0.999228	-0.160564	normal	--	--	Cellular Component: integral component of membrane (GO:0016021);;	K15015|0|sita:101755709|vacuolar amino acid transporter 1-like; K15015 solute carrier family 32 (vesicular inhibitory amino acid transporter) (A)	--	[E]	Amino acid transport and metabolism	Transmembrane amino acid transporter protein	Lysine histidine transporter 1 GN=LHT1 OS=Arabidopsis thaliana (Mouse-ear cress) PE=1 SV=1	E	Amino acid transport and metabolism	PREDICTED: vacuolar amino acid transporter 1-like [Setaria italica]
Seita.1G001200	Seita.1G001200	0.03375	3	0.030458	3	0.029964	3	0.040915	3	0.027832	2	0	0	--	--	--	--	--	Cellular Component: extracellular region (GO:0005576);; Biological Process: lipid metabolic process (GO:0006629);; Cellular Component: cytoplasmic membrane-bounded vesicle (GO:0016023);; Molecular Function: hydrolase activity, acting on ester bonds (GO:0016788);;	--	--	--	--	GDSL-like Lipase/Acylhydrolase	GDSL esterase/lipase EXL3 (Precursor) GN=EXL3 OS=Arabidopsis thaliana (Mouse-ear cress) PE=2 SV=1	I	Lipid transport and metabolism	PREDICTED: GDSL esterase/lipase EXL3-like [Setaria italica]
Seita.1G001300	Seita.1G001300	280.465	28928	295.55	40182	359.766	41935	437.232	45587	366.565	45523	313.166	33917	0.999228	-0.148399	normal	[CHR]	Energy production and conversion;; Coenzyme transport and metabolism;; General function prediction only	Cellular Component: peroxisome (GO:0005777);; Biological Process: rRNA processing (GO:0006364);; Molecular Function: poly(U) RNA binding (GO:0008266);; Molecular Function: glycerate dehydrogenase activity (GO:0008465);; Cellular Component: chloroplast (GO:0009507);; Biological Process: response to blue light (GO:0009637);; Biological Process: plastid organization (GO:0009657);; Biological Process…	K15893|0|sita:101756516|glycerate dehydrogenase HPR, peroxisomal-like; K15893 hydroxypyruvate reductase 1 (A)	Glycine, serine and threonine metabolism (ko00260);; Glyoxylate and dicarboxylate metabolism (ko00630)	[C]	Energy production and conversion	D-isomer specific 2-hydroxyacid dehydrogenase, NAD binding domain;; D-isomer specific 2-hydroxyacid dehydrogenase, catalytic domain	Glycerate dehydrogenase HPR, peroxisomal GN=HPR OS=Arabidopsis thaliana (Mouse-ear cress) PE=1 SV=1	E	Amino acid transport and metabolism	PREDICTED: glycerate dehydrogenase HPR, peroxisomal-like [Setaria italica]
Seita.1G001400	Seita.1G001400	0.308005	6	0.286072	8	0.094609	3	0.089734	2	0.264003	7	0.105768	3	--	--	--	[O]	Posttranslational modification, protein turnover, chaperones	Biological Process: ubiquitin-dependent protein catabolic process (GO:0006511);;	K03094|9.3356e-82|sita:101756927|SKP1-like protein 1B-like; K03094 S-phase kinase-associated protein 1 (A)	Ubiquitin mediated proteolysis (ko04120);; Protein processing in endoplasmic reticulum (ko04141)	[O]	Posttranslational modification, protein turnover, chaperones	Skp1 family, dimerisation domain;; Skp1 family, tetramerisation domain	SKP1-like protein 1B GN=MJC20.30 OS=Arabidopsis thaliana (Mouse-ear cress) PE=1 SV=1	O	Posttranslational modification, protein turnover, chaperones	PREDICTED: SKP1-like protein 1B-like [Setaria italica]
Seita.1G001500	Seita.1G001500	18.9149	4030	37.6704	10576	37.2418	8937	28.6586	6127	29.1969	7468	39.9532	8868	1	0.0941574	normal	--	--	Molecular Function: ubiquitin-protein transferase activity (GO:0004842);; Cellular Component: intracellular (GO:0005622);; Cellular Component: plasma membrane (GO:0005886);; Biological Process: trichome branching (GO:0010091);; Biological Process: vegetative to reproductive phase transition of meristem (GO:0010228);; Biological Process: protein ubiquitination (GO:0016567);; Biological Process: pr…	K10590|0|sita:101758275|E3 ubiquitin-protein ligase UPL3-like; K10590 E3 ubiquitin-protein ligase TRIP12 [EC:6.3.2.19] (A)	Ubiquitin mediated proteolysis (ko04120)	[O]	Posttranslational modification, protein turnover, chaperones	HECT-domain (ubiquitin-transferase);; Armadillo/beta-catenin-like repeat	E3 ubiquitin-protein ligase UPL3 GN=F20M13.160/F20M13.170 OS=Arabidopsis thaliana (Mouse-ear cress) PE=1 SV=1	O	Posttranslational modification, protein turnover, chaperones	PREDICTED: E3 ubiquitin-protein ligase UPL3-like [Setaria italica]
Seita.1G001600	Seita.1G001600	3.0431	309	2.57866	358	2.76571	313	2.69416	264	2.48175	288	2.43025	241	0.982953	0.310241	normal	[Z]	Cytoskeleton	Molecular Function: binding (GO:0005488);; Cellular Component: microtubule cytoskeleton (GO:0015630);; Cellular Component: protein complex (GO:0043234);; Cellular Component: cytoskeletal part (GO:0044430);;	K10401|0|zma:103655001|kinesin-like protein KIF18A; K10401 kinesin family member 18/19 (A)	--	[Z]	Cytoskeleton	Kinesin motor domain	Probable 125 kDa kinesin-related protein GN=At2g36200 OS=Arabidopsis thaliana (Mouse-ear cress) PE=2 SV=2	Z	Cytoskeleton	PREDICTED: kinesin-like protein KIF18A isoform X1 [Zea mays]
Seita.1G001700	Seita.1G001700	0	0	0	0	0	0	0.040765	2	0	0	0	0	--	--	--	--	--	Cellular Component: mitochondrion (GO:0005739);;	--	--	--	--	Pollen proteins Ole e I like	--	R	General function prediction only	PREDICTED: trithorax group protein osa-like [Setaria italica]
Seita.1G001800	Seita.1G001800	0.024546	2	0.009275	1	0.026469	2	0	0	0	0	0	0	--	--	--	[O]	Posttranslational modification, protein turnover, chaperones	--	K17479|1.39196e-88|zma:103654996|uncharacterized protein At5g39865-like; K17479 glutaredoxin domain-containing cysteine-rich protein 1 (A)	--	[O]	Posttranslational modification, protein turnover, chaperones	Glutaredoxin	Uncharacterized protein At3g28850 GN=At3g28850 OS=Arabidopsis thaliana (Mouse-ear cress) PE=3 SV=1	O	Posttranslational modification, protein turnover, chaperones	PREDICTED: uncharacterized protein At5g39865-like [Zea mays]
Seita.1G001900	Seita.1G001900	60.0418	3848	35.0103	2896	29.5699	2137	15.7072	1018	14.6777	1138	15.3362	1032	0.0233282	1.45245	normal	[P]	Inorganic ion transport and metabolism	Cellular Component: mitochondrion (GO:0005739);;	--	--	[P]	Inorganic ion transport and metabolism	Rhodanese-like domain	Rhodanese-like domain-containing protein 17 GN=STR17 OS=Arabidopsis thaliana (Mouse-ear cress) PE=2 SV=1	P	Inorganic ion transport and metabolism	PREDICTED: thiosulfate sulfurtransferase 18-like [Setaria italica]
Seita.1G002000	Seita.1G002000	8.996	573	15.0453	1261	10.8306	776	0.717562	46	1.09342	84	1.3803	92	1.92754e-05	3.56869	up	[P]	Inorganic ion transport and metabolism	--	--	--	[P]	Inorganic ion transport and metabolism	Rhodanese-like domain	Thiosulfate sulfurtransferase 18 GN=STR18 OS=Arabidopsis thaliana (Mouse-ear cress) PE=1 SV=1	P	Inorganic ion transport and metabolism	PREDICTED: thiosulfate sulfurtransferase 18-like [Setaria italica]
Seita.1G002100	Seita.1G002100	8.45927	788	4.76984	584	4.70647	480	4.41608	413	3.80296	424	4.33806	420	0.849296	0.534417	normal	[J]	Translation, ribosomal structure and biogenesis	Molecular Function: RNA binding (GO:0003723);; Molecular Function: structural constituent of ribosome (GO:0003735);; Cellular Component: mitochondrion (GO:0005739);; Cellular Component: endosome (GO:0005768);; Cellular Component: Golgi apparatus (GO:0005794);; Cellular Component: trans-Golgi network (GO:0005802);; Cellular Component: ribosome (GO:0005840);; Biological Process: translation (GO:000…	K02988|0|sita:101759494|trichohyalin-like; K02988 small subunit ribosomal protein S5 (A)	Ribosome (ko03010)	[J]	Translation, ribosomal structure and biogenesis	Ribosomal protein S5, C-terminal domain;; Ribosomal protein S5, N-terminal domain	--	J	Translation, ribosomal structure and biogenesis	PREDICTED: trichohyalin-like [Setaria italica]
Seita.1G002200	Seita.1G002200	37.5336	2021	34.7725	2467	36.0789	2188	43.8358	2368	47.3003	3057	38.4776	2158	0.993602	-0.168601	normal	[R]	General function prediction only	Cellular Component: nucleus (GO:0005634);; Cellular Component: mitochondrion (GO:0005739);; Biological Process: embryo sac development (GO:0009553);; Biological Process: double fertilization forming two zygotes (GO:0009677);;	--	--	[R]	General function prediction only	Ankyrin repeat;; Ankyrin repeats (many copies);; Ankyrin repeats (3 copies);; Ankyrin repeat;; Ankyrin repeats (many copies)	Ankyrin repeat-containing protein At5g02620 GN=At5g02620 OS=Arabidopsis thaliana (Mouse-ear cress) PE=1 SV=1	R	General function prediction only	PREDICTED: serine/threonine-protein phosphatase 6 regulatory ankyrin repeat subunit C-like [Setaria italica]
Seita.1G002300	Seita.1G002300	32.2223	1358	17.8882	994	18.7008	888	28.333	1198	24.6539	1247	16.6638	732	1	0.0181978	normal	[K]	Transcription	Molecular Function: nucleic acid binding (GO:0003676);; Cellular Component: nucleolus (GO:0005730);; Cellular Component: nuclear body (GO:0016604);; Cellular Component: ribonucleoprotein complex (GO:0030529);;	K11088|4.34005e-66|osa:4332206|Os03g0240800; K11088 small nuclear ribonucleoprotein D3 (A)	Spliceosome (ko03040)	[A]	RNA processing and modification	LSM domain	--	A	RNA processing and modification	Os03g0240800 [Oryza sativa Japonica Group]
Seita.1G002400	Seita.1G002400	0	0	0	0	0	0	0	0	0	0	0	0	--	--	--	--	--	Molecular Function: phospholipid binding (GO:0005543);;	--	--	--	--	Protein of unknown function (DUF1336);; START domain	Protein ENHANCED DISEASE RESISTANCE 2 GN=EDR2 OS=Arabidopsis thaliana (Mouse-ear cress) PE=2 SV=1	S	Function unknown	PREDICTED: protein ENHANCED DISEASE RESISTANCE 2-like isoform X1 [Zea mays]
Seita.1G002500	Seita.1G002500	13.3081	1487	16.1275	2367	15.2257	1913	16.9437	1920	14.6101	1955	18.8111	2185	1	-0.0654934	normal	[O]	Posttranslational modification, protein turnover, chaperones	Molecular Function: ATP binding (GO:0005524);; Cellular Component: nucleolus (GO:0005730);; Cellular Component: mitochondrion (GO:0005739);; Cellular Component: plasma membrane (GO:0005886);; Biological Process: cell death (GO:0008219);; Biological Process: response to cold (GO:0009409);; Cellular Component: chloroplast stroma (GO:0009570);; Biological Process: systemic acquired resistance (GO:00…	K04077|0|sita:101761781|ruBisCO large subunit-binding protein subunit beta, chloroplastic-like; K04077 chaperonin GroEL (A)	RNA degradation (ko03018)	[O]	Posttranslational modification, protein turnover, chaperones	TCP-1/cpn60 chaperonin family	RuBisCO large subunit-binding protein subunit beta, chloroplastic (Precursor) OS=Pisum sativum (Garden pea) PE=1 SV=2	O	Posttranslational modification, protein turnover, chaperones	PREDICTED: ruBisCO large subunit-binding protein subunit beta, chloroplastic-like [Setaria italica]
Seita.1G002600	Seita.1G002600	14.386	2035	15.1633	2750	17.7943	2826	19.2719	2726	16.6688	2822	20.491	3012	0.993602	-0.155764	normal	--	--	Molecular Function: G-protein coupled receptor binding (GO:0001664);; Molecular Function: GTPase activity (GO:0003924);; Molecular Function: signal transducer activity (GO:0004871);; Molecular Function: GTP binding (GO:0005525);; Cellular Component: nucleus (GO:0005634);; Cellular Component: heterotrimeric G-protein complex (GO:0005834);; Biological Process: GTP catabolic process (GO:0006184);; B…	--	--	[DT]	Cell cycle control, cell division, chromosome partitioning;; Signal transduction mechanisms	G-protein alpha subunit	Extra-large guanine nucleotide-binding protein 3 GN=XLG3 OS=Arabidopsis thaliana (Mouse-ear cress) PE=1 SV=1	4489		PREDICTED: uncharacterized protein LOC101761123 isoform X1 [Setaria italica]
Seita.1G002700	Seita.1G002700	4.50026	640	6.27032	1097	5.64173	932	6.33503	900	5.86365	976	5.84797	837	1	-0.00505009	normal	[K]	Transcription	Molecular Function: DNA binding (GO:0003677);; Molecular Function: DNA-directed RNA polymerase activity (GO:0003899);; Biological Process: transcription, DNA-templated (GO:0006351);; Biological Process: embryo sac egg cell differentiation (GO:0009560);; Molecular Function: ribonucleoside binding (GO:0032549);;	K03021|0|sita:101762596|DNA-directed RNA polymerase III subunit rpc2-like; K03021 DNA-directed RNA polymerase III subunit RPC2 [EC:2.7.7.6] (A)	Purine metabolism (ko00230);; Pyrimidine metabolism (ko00240);; RNA polymerase (ko03020)	[K]	Transcription	RNA polymerase Rpb2, domain 6;; RNA polymerase beta subunit;; RNA polymerase Rpb2, domain 7;; RNA polymerase Rpb2, domain 2;; RNA polymerase Rpb2, domain 4;; RNA polymerase Rpb2, domain 3;; RNA polymerase Rpb2, domain 5	DNA-directed RNA polymerase II subunit RPB2 GN=RPB2 OS=Solanum lycopersicum (Tomato) PE=2 SV=1	K	Transcription	PREDICTED: DNA-directed RNA polymerase III subunit rpc2-like isoform X1 [Setaria italica]
Seita.1G002800	Seita.1G002800	7.45836	131	3.16564	74	3.37427	67	4.33282	77	2.31872	49	2.67669	49	0.89562	0.592784	normal	--	--	Molecular Function: enzyme inhibitor activity (GO:0004857);; Cellular Component: cytoplasmic membrane-bounded vesicle (GO:0016023);; Molecular Function: pectinesterase activity (GO:0030599);; Biological Process: negative regulation of catalytic activity (GO:0043086);;	--	--	--	--	Plant invertase/pectin methylesterase inhibitor	Putative invertase inhibitor (Precursor) OS=Platanus acerifolia (London plane tree) PE=1 SV=1	R	General function prediction only	PREDICTED: putative invertase inhibitor-like [Setaria italica]
Seita.1G002900	Seita.1G002900	0.166864	4	0.031708	1	0	0	0.199033	5	0.482644	14	0.119256	3	--	--	--	--	--	Molecular Function: enzyme inhibitor activity (GO:0004857);; Cellular Component: cytoplasmic membrane-bounded vesicle (GO:0016023);; Molecular Function: pectinesterase activity (GO:0030599);; Biological Process: negative regulation of catalytic activity (GO:0043086);;	--	--	--	--	Plant invertase/pectin methylesterase inhibitor	Putative invertase inhibitor (Precursor) OS=Platanus acerifolia (London plane tree) PE=1 SV=1	R	General function prediction only	PREDICTED: putative invertase inhibitor-like [Setaria italica]
Seita.1G003000	Seita.1G003000	0.252539	20	0.385278	40	0.191033	17	0.151232	12	0.110647	11	0.137439	12	--	--	--	--	--	Cellular Component: membrane (GO:0016020);; Cellular Component: cytoplasmic membrane-bounded vesicle (GO:0016023);;	K02940|0|sita:101773010|WAT1-related protein At3g30340-like; K02940 large subunit ribosomal protein L9e (A)	Ribosome (ko03010)	--	--	EamA-like transporter family	WAT1-related protein At3g30340 GN=At3g30340 OS=Arabidopsis thaliana (Mouse-ear cress) PE=2 SV=1	S	Function unknown	PREDICTED: WAT1-related protein At3g30340-like [Setaria italica]
Seita.1G003100	Seita.1G003100	52.7529	1918	31.4615	1508	32.7197	1340	38.0848	1390	30.1855	1318	30.7257	1164	0.96549	0.282895	normal	[J]	Translation, ribosomal structure and biogenesis	Molecular Function: structural constituent of ribosome (GO:0003735);; Cellular Component: nucleolus (GO:0005730);; Cellular Component: vacuole (GO:0005773);; Cellular Component: plasma membrane (GO:0005886);; Biological Process: translation (GO:0006412);; Cellular Component: chloroplast envelope (GO:0009941);; Biological Process: adaxial/abaxial pattern specification (GO:0009955);; Molecular Func…	K02940|3.04641e-121|sita:101772541|60S ribosomal protein L9-like; K02940 large subunit ribosomal protein L9e (A)	Ribosome (ko03010)	[J]	Translation, ribosomal structure and biogenesis	Ribosomal protein L6	60S ribosomal protein L9 OS=Oryza sativa subsp. japonica (Rice) PE=2 SV=3	J	Translation, ribosomal structure and biogenesis	PREDICTED: 60S ribosomal protein L9-like [Setaria italica]
Seita.1G003200	Seita.1G003200	295.797	17799	500.372	39678	477.919	32391	296.801	17922	286.769	20716	250.422	15699	0.837395	0.75537	normal	[P]	Inorganic ion transport and metabolism	Biological Process: MAPK cascade (GO:0000165);; Molecular Function: NADPH dehydrogenase activity (GO:0003959);; Molecular Function: ferredoxin-NADP+ reductase activity (GO:0004324);; Biological Process: pentose-phosphate shunt (GO:0006098);; Biological Process: rRNA processing (GO:0006364);; Biological Process: protein targeting to membrane (GO:0006612);; Molecular Function: poly(U) RNA binding (…	K02641|0|sita:101763545|ferredoxin--NADP reductase, leaf isozyme, chloroplastic-like; K02641 ferredoxin--NADP+ reductase [EC:1.18.1.2] (A)	Photosynthesis (ko00195)	[C]	Energy production and conversion	Oxidoreductase NAD-binding domain;; Oxidoreductase FAD-binding domain;; FAD binding domain	Ferredoxin--NADP reductase, leaf isozyme, chloroplastic (Precursor) OS=Oryza sativa subsp. japonica (Rice) PE=2 SV=1	C	Energy production and conversion	PREDICTED: ferredoxin--NADP reductase, leaf isozyme, chloroplastic-like [Setaria italica]
Seita.1G003300	Seita.1G003300	0.584292	32	0.106047	8	0.23814	15	0.728091	32	0.622684	41	0.136546	8	--	--	--	--	--	Cellular Component: membrane (GO:0016020);; Cellular Component: cytoplasmic membrane-bounded vesicle (GO:0016023);;	--	--	--	--	EamA-like transporter family	WAT1-related protein At4g01440 GN=At4g01440 OS=Arabidopsis thaliana (Mouse-ear cress) PE=2 SV=1	S	Function unknown	PREDICTED: WAT1-related protein At4g01440-like [Setaria italica]
Seita.1G003400	Seita.1G003400	0	0	0	0	0	0	0	0	0.054888	4	0.093597	6	--	--	--	--	--	Cellular Component: membrane (GO:0016020);; Cellular Component: cytoplasmic membrane-bounded vesicle (GO:0016023);;	--	--	--	--	EamA-like transporter family	WAT1-related protein At1g09380 GN=At1g09380 OS=Arabidopsis thaliana (Mouse-ear cress) PE=2 SV=1	S	Function unknown	PREDICTED: WAT1-related protein At5g64700-like [Setaria italica]
Seita.1G003500	Seita.1G003500	79.6591	3234	60.8817	3272	59.765	2703	85.1205	3402	75.8147	3639	71.1536	2923	0.999228	-0.117584	normal	--	--	Molecular Function: DNA binding (GO:0003677);; Molecular Function: sequence-specific DNA binding transcription factor activity (GO:0003700);; Cellular Component: nucleus (GO:0005634);; Biological Process: regulation of transcription, DNA-templated (GO:0006355);; Molecular Function: protein dimerization activity (GO:0046983);;	--	--	[K]	Transcription	SRF-type transcription factor (DNA-binding and dimerisation domain);; K-box region	MADS-box transcription factor 50 OS=Oryza sativa subsp. japonica (Rice) PE=2 SV=1	S	Function unknown	PREDICTED: uncharacterized protein LOC101765570 [Setaria italica]
Seita.1G003600	Seita.1G003600	22.6072	433	35.7801	902	34.8977	751	48.8677	938	49.1027	1126	43.5723	867	0.855789	-0.461873	normal	--	--	--	--	--	--	--	--	--	S	Function unknown	PREDICTED: uncharacterized protein LOC103980311 [Musa acuminata subsp. malaccensis]
Seita.1G003700	Seita.1G003700	6.72591	759	7.18891	1068	9.65497	1226	4.33752	491	5.26893	713	4.9903	586	0.550486	0.804395	normal	--	--	Molecular Function: DNA binding (GO:0003677);; Molecular Function: chromatin binding (GO:0003682);; Molecular Function: sequence-specific DNA binding transcription factor activity (GO:0003700);; Biological Process: regulation of transcription, DNA-templated (GO:0006355);;	--	--	[K]	Transcription	Myb/SANT-like DNA-binding domain	Trihelix transcription factor GT-2 GN=GT-2 OS=Arabidopsis thaliana (Mouse-ear cress) PE=2 SV=1	K	Transcription	PREDICTED: trihelix transcription factor GTL1-like [Setaria italica]
Seita.1G003800	Seita.1G003800	56.2495	4173	30.3272	2964	28.45	2374	27.9745	2081	24.1582	2156	23.8707	1846	0.699835	0.620051	normal	[R]	General function prediction only	Molecular Function: GTPase activity (GO:0003924);; Molecular Function: nitric-oxide synthase activity (GO:0004517);; Molecular Function: GTP binding (GO:0005525);; Cellular Component: mitochondrion (GO:0005739);; Biological Process: GTP catabolic process (GO:0006184);; Biological Process: rRNA processing (GO:0006364);; Biological Process: tRNA metabolic process (GO:0006399);; Biological Process: …	K13427|0|sita:101766392|putative nitric oxide synthase-like; K13427 nitric-oxide synthase, plant [EC:1.14.13.39] (A)	Arginine and proline metabolism (ko00330);; Plant-pathogen interaction (ko04626)	[R]	General function prediction only	50S ribosome-binding GTPase	Putative nitric oxide synthase OS=Oryza sativa subsp. japonica (Rice) PE=3 SV=1	H	Coenzyme transport and metabolism	PREDICTED: putative nitric oxide synthase-like [Setaria italica]
Seita.1G003900	Seita.1G003900	9.13559	441	9.06801	567	9.04594	486	12.0903	579	11.3401	647	10.9968	543	0.987643	-0.235078	normal	--	--	Cellular Component: mitochondrion (GO:0005739);; Biological Process: glucose catabolic process (GO:0006007);; Cellular Component: plastid (GO:0009536);;	--	--	--	--	--	--	S	Function unknown	PREDICTED: uncharacterized protein LOC101766807 [Setaria italica]
Seita.1G004000	Seita.1G004000	5.51822	269	3.95779	257	4.88284	267	7.01699	346	6.78746	401	5.61435	283	0.962932	-0.366971	normal	--	--	Molecular Function: nucleotide binding (GO:0000166);; Molecular Function: nucleic acid binding (GO:0003676);;	--	--	--	--	RNA recognition motif. (a.k.a. RRM, RBD, or RNP domain);; RNA recognition motif (a.k.a. RRM, RBD, or RNP domain);; RNA recognition motif. (a.k.a. RRM, RBD, or RNP domain)	--	R	General function prediction only	PREDICTED: RNA-binding protein 48-like [Setaria italica]
Seita.1G004100	Seita.1G004100	9.93371	2019	12.8187	3272	11.9967	2689	12.7486	2382	11.0244	2603	13.4205	2689	1	0.0670208	normal	--	--	Biological Process: COPII vesicle coating (GO:0048208);;	--	--	[K]	Transcription	Sec23-binding domain of Sec16;; Vesicle coat trafficking protein Sec16 mid-region	Protein transport protein SEC16B homolog {ECO:0000305} OS=Arabidopsis thaliana (Mouse-ear cress) PE=1 SV=1	K	Transcription	PREDICTED: uncharacterized protein LOC101767622 isoform X1 [Setaria italica]
Seita.1G004200	Seita.1G004200	28.8279	2398	32.5094	3563	29.6756	2780	43.6479	3643	37.4318	3737	41.3612	3584	0.954568	-0.321835	normal	[C]	Energy production and conversion	Molecular Function: dihydrolipoyllysine-residue acetyltransferase activity (GO:0004742);; Molecular Function: copper ion binding (GO:0005507);; Cellular Component: mitochondrion (GO:0005739);; Biological Process: pyruvate metabolic process (GO:0006090);; Cellular Component: chloroplast envelope (GO:0009941);; Cellular Component: pyruvate dehydrogenase complex (GO:0045254);;	K00627|0|sita:101768289|dihydrolipoyllysine-residue acetyltransferase component 3 of pyruvate dehydrogenase complex, mitochondrial-like; K00627 pyruvate dehydrogenase E2 component (dihydrolipoamide acetyltransferase) [EC:2.3.1.12] (A)	Glycolysis / Gluconeogenesis (ko00010);; Citrate cycle (TCA cycle) (ko00020);; Pyruvate metabolism (ko00620);; Carbon metabolism (ko01200)	[C]	Energy production and conversion	2-oxoacid dehydrogenases acyltransferase (catalytic domain);; Biotin-requiring enzyme;; e3 binding domain	Dihydrolipoyllysine-residue acetyltransferase component 3 of pyruvate dehydrogenase complex, mitochondrial (Precursor) GN=At1g54220 OS=Arabidopsis thaliana (Mouse-ear cress) PE=2 SV=1	C	Energy production and conversion	PREDICTED: dihydrolipoyllysine-residue acetyltransferase component 3 of pyruvate dehydrogenase complex, mitochondrial-like [Setaria italica]
Seita.1G004300	Seita.1G004300	37.2565	2710	40.7675	3936	49.7166	4094	81.9461	6023	79.1112	6906	62.0322	4699	0.649205	-0.685574	normal	[C]	Energy production and conversion	Molecular Function: L-lactate dehydrogenase activity (GO:0004459);; Cellular Component: cytoplasm (GO:0005737);; Cellular Component: plasma membrane (GO:0005886);; Biological Process: glycolytic process (GO:0006096);; Biological Process: response to salt stress (GO:0009651);; Biological Process: response to abscisic acid (GO:0009737);; Biological Process: cellular carbohydrate metabolic process (…	K00016|0|sita:101768692|L-lactate dehydrogenase-like; K00016 L-lactate dehydrogenase [EC:1.1.1.27] (A)	Glycolysis / Gluconeogenesis (ko00010);; Cysteine and methionine metabolism (ko00270);; Pyruvate metabolism (ko00620);; Propanoate metabolism (ko00640)	[C]	Energy production and conversion	lactate/malate dehydrogenase, NAD binding domain;; lactate/malate dehydrogenase, alpha/beta C-terminal domain	L-lactate dehydrogenase OS=Zea mays (Maize) PE=2 SV=1	C	Energy production and conversion	PREDICTED: L-lactate dehydrogenase-like [Setaria italica]
Seita.1G004400	Seita.1G004400	0.267782	14	0.103361	7	0.349602	20	0.282687	14	0.238334	14	1.11905	57	--	--	--	[C]	Energy production and conversion	Molecular Function: L-lactate dehydrogenase activity (GO:0004459);; Cellular Component: cytoplasm (GO:0005737);; Cellular Component: plasma membrane (GO:0005886);; Biological Process: glycolytic process (GO:0006096);; Biological Process: response to salt stress (GO:0009651);; Biological Process: response to abscisic acid (GO:0009737);; Biological Process: cellular carbohydrate metabolic process (…	K00016|0|sita:101769096|L-lactate dehydrogenase A-like; K00016 L-lactate dehydrogenase [EC:1.1.1.27] (A)	Glycolysis / Gluconeogenesis (ko00010);; Cysteine and methionine metabolism (ko00270);; Pyruvate metabolism (ko00620);; Propanoate metabolism (ko00640)	[C]	Energy production and conversion	lactate/malate dehydrogenase, NAD binding domain;; lactate/malate dehydrogenase, alpha/beta C-terminal domain	L-lactate dehydrogenase A OS=Hordeum vulgare (Barley) PE=1 SV=1	C	Energy production and conversion	PREDICTED: L-lactate dehydrogenase A-like [Setaria italica]
Seita.1G004500	Seita.1G004500	10.5656	722	4.56106	411	3.62244	279	7.52694	516	7.42635	609	6.78432	483	0.994358	-0.226803	normal	--	--	Biological Process: response to temperature stimulus (GO:0009266);; Biological Process: cellular response to stress (GO:0033554);; Biological Process: response to chemical (GO:0042221);; Cellular Component: cell part (GO:0044464);;	--	--	--	--	--	BAG family molecular chaperone regulator 7 GN=BAG7 OS=Arabidopsis thaliana (Mouse-ear cress) PE=1 SV=1	S	Function unknown	PREDICTED: BAG family molecular chaperone regulator 7-like [Setaria italica]
Seita.1G004600	Seita.1G004600	0.592602	57	801.353	100651	887.345	95258	344.839	32983	484.514	55439	319.718	31747	0.948896	0.795325	normal	[G]	Carbohydrate transport and metabolism	Molecular Function: sucrose alpha-glucosidase activity (GO:0004575);; Biological Process: carbohydrate metabolic process (GO:0005975);;	K01193|0|sita:101769910|sucrose:sucrose 1-fructosyltransferase-like; K01193 beta-fructofuranosidase [EC:3.2.1.26] (A)	Galactose metabolism (ko00052);; Starch and sucrose metabolism (ko00500)	[G]	Carbohydrate transport and metabolism	Glycosyl hydrolases family 32 N-terminal domain;; Domain of unknown function (DUF3357);; Glycosyl hydrolases family 32 C terminal	Sucrose:sucrose 1-fructosyltransferase (Precursor) GN=1-SST OS=Festuca arundinacea (Tall fescue) PE=1 SV=1	G	Carbohydrate transport and metabolism	PREDICTED: LOW QUALITY PROTEIN: sucrose:sucrose 1-fructosyltransferase-like [Setaria italica]
Seita.1G004700	Seita.1G004700	0	0	0	0	0	0	0	0	0	0	0	0	--	--	--	--	--	--	--	--	--	--	Protein of unknown function (DUF1618)	--	R	General function prediction only	PREDICTED: uncharacterized protein LOC101774644 [Setaria italica]
Seita.1G004800	Seita.1G004800	0	0	0.234512	10	0.106505	4	0.181344	6	0.060196	3	0	0	--	--	--	--	--	--	--	--	[R]	General function prediction only	PPR repeat;; PPR repeat family;; DYW family of nucleic acid deaminases;; PPR repeat;; Pentatricopeptide repeat domain	Putative pentatricopeptide repeat-containing protein At1g68930 GN=PCMP-H22 OS=Arabidopsis thaliana (Mouse-ear cress) PE=3 SV=1	R	General function prediction only	hypothetical protein SORBIDRAFT_04g028180 [Sorghum bicolor]
Seita.1G004900	Seita.1G004900	0	0	0	0	0	0	0	0	0	0	0	0	--	--	--	--	--	Molecular Function: zinc ion binding (GO:0008270);;	--	--	[O]	Posttranslational modification, protein turnover, chaperones	Ring finger domain	RING-H2 finger protein ATL72 GN=ATL72 OS=Arabidopsis thaliana (Mouse-ear cress) PE=2 SV=1	O	Posttranslational modification, protein turnover, chaperones	PREDICTED: RING-H2 finger protein ATL79-like [Setaria italica]
Seita.1G005000	Seita.1G005000	1.06912	59	0.918598	67	1.12115	70	0.795908	44	0.662277	44	0.420441	25	0.782013	0.813697	normal	--	--	Molecular Function: zinc ion binding (GO:0008270);;	--	--	[O]	Posttranslational modification, protein turnover, chaperones	Ring finger domain;; RING-H2 zinc finger;; Zinc finger, C3HC4 type (RING finger);; Zinc finger, C3HC4 type (RING finger);; Zinc finger, C3HC4 type (RING finger);; Anaphase-promoting complex subunit 11 RING-H2 finger;; FANCL C-terminal domain	RING-H2 finger protein ATL72 GN=ATL72 OS=Arabidopsis thaliana (Mouse-ear cress) PE=2 SV=1	O	Posttranslational modification, protein turnover, chaperones	PREDICTED: RING-H2 finger protein ATL79-like [Setaria italica]
Seita.1G005100	Seita.1G005100	6.56209	506	7.64994	736	6.60167	559	7.19635	519	7.54334	688	6.45101	515	1	0.0783144	normal	--	--	--	--	--	[Z]	Cytoskeleton	Protein of unknown function (DUF615)	--	Z	Cytoskeleton	PREDICTED: uncharacterized protein LOC101771118 [Setaria italica]
Seita.1G005200	Seita.1G005200	3.40655	325	1.73013	214	2.06866	221	2.1226	197	1.62618	194	1.87308	172	0.95623	0.415654	normal	--	--	--	--	--	[S]	Function unknown	Peptidase family C78	--	S	Function unknown	PREDICTED: zinc finger with UFM1-specific peptidase domain protein-like isoform X1 [Setaria italica]
Seita.1G005300	Seita.1G005300	16.1062	1075	22.5567	1982	21.5543	1618	24.5761	1645	24.4928	1960	20.5815	1429	0.999228	-0.082113	normal	--	--	Cellular Component: integral component of membrane (GO:0016021);;	--	--	[R]	General function prediction only	TMPIT-like protein	--	S	Function unknown	PREDICTED: transmembrane protein 120 homolog [Setaria italica]
Seita.1G005400	Seita.1G005400	8.24611	641	0.778849	80	0.779372	69	1.96073	153	1.60346	150	1.00167	82	0.946625	0.941504	normal	[RTKL]	General function prediction only;; Signal transduction mechanisms;; Transcription;; Replication, recombination and repair	Molecular Function: protein tyrosine kinase activity (GO:0004713);; Molecular Function: ATP binding (GO:0005524);; Biological Process: protein phosphorylation (GO:0006468);; Cellular Component: cytoplasmic membrane-bounded vesicle (GO:0016023);;	--	--	[T]	Signal transduction mechanisms	Protein kinase domain;; Protein tyrosine kinase	Probable receptor-like protein kinase At1g33260 GN=At1g33260 OS=Arabidopsis thaliana (Mouse-ear cress) PE=2 SV=1	T	Signal transduction mechanisms	PREDICTED: probable receptor-like protein kinase At1g33260-like [Setaria italica]
Seita.1G005500	Seita.1G005500	10.6697	2852	10.0414	3533	8.89909	2675	8.70637	2335	7.67058	2461	9.57267	2666	0.975563	0.273681	normal	[R]	General function prediction only	Molecular Function: nucleic acid binding (GO:0003676);; Molecular Function: ATP binding (GO:0005524);; Cellular Component: nucleolus (GO:0005730);; Cellular Component: mitochondrion (GO:0005739);; Molecular Function: ATP-dependent helicase activity (GO:0008026);; Cellular Component: membrane (GO:0016020);; Cellular Component: ribonucleoprotein complex (GO:0030529);;	K12854|0|sita:101772985|U5 small nuclear ribonucleoprotein 200 kDa helicase-like; K12854 pre-mRNA-splicing helicase BRR2 [EC:3.6.4.13] (A)	Spliceosome (ko03040)	[A]	RNA processing and modification	Sec63 Brl domain;; DEAD/DEAH box helicase;; Type III restriction enzyme, res subunit;; AAA domain;; Helicase conserved C-terminal domain	Helicase and polymerase-containing protein TEBICHI GN=TEB OS=Arabidopsis thaliana (Mouse-ear cress) PE=2 SV=1	A	RNA processing and modification	PREDICTED: LOW QUALITY PROTEIN: U5 small nuclear ribonucleoprotein 200 kDa helicase-like [Setaria italica]
Seita.1G005600	Seita.1G005600	3.5739	173	14.0528	897	14.1428	771	13.0207	633	13.4279	781	13.1116	662	0.996351	-0.122268	normal	--	--	Molecular Function: monooxygenase activity (GO:0004497);; Molecular Function: iron ion binding (GO:0005506);; Molecular Function: electron carrier activity (GO:0009055);; Molecular Function: oxidoreductase activity, acting on paired donors, with incorporation or reduction of molecular oxygen (GO:0016705);; Molecular Function: heme binding (GO:0020037);; Biological Process: oxidation-reduction pro…	--	--	[Q]	Secondary metabolites biosynthesis, transport and catabolism	Cytochrome P450	Cytochrome P450 89A9 GN=CYP89A9 OS=Arabidopsis thaliana (Mouse-ear cress) PE=2 SV=1	R	General function prediction only	hypothetical protein SORBIDRAFT_04g000760 [Sorghum bicolor]
Seita.1G005700	Seita.1G005700	0	0	0	0	0	0	5.91192	604	0	0	0	0	--	--	--	--	--	--	--	--	--	--	Protein of unknown function (DUF793)	--	S	Function unknown	PREDICTED: uncharacterized protein LOC101773394 [Setaria italica]
Seita.1G005800	Seita.1G005800	7.0501	854	10.9076	1731	11.4595	1549	11.1754	1360	10.4883	1515	11.0317	1386	1	-0.0174003	normal	--	--	--	K15601|0|osa:4328036|Os02g0109400; K15601 lysine-specific demethylase 3 [EC:1.14.11.-] (A)	--	[K]	Transcription	JmjC domain, hydroxylase	Lysine-specific demethylase JMJ25 GN=MLP3.6 OS=Arabidopsis thaliana (Mouse-ear cress) PE=1 SV=1	K	Transcription	hypothetical protein OsI_05529 [Oryza sativa Indica Group]
Seita.1G005900	Seita.1G005900	26.7184	2231	21.3418	2349	23.5503	2215	22.5591	1891	19.2076	1926	19.9131	1733	0.970021	0.293549	normal	[R]	General function prediction only	Cellular Component: plasma membrane (GO:0005886);; Cellular Component: plastid (GO:0009536);;	--	--	[Z]	Cytoskeleton	Tetratricopeptide repeat;; TPR repeat;; Tetratricopeptide repeat;; Tetratricopeptide repeat;; Tetratricopeptide repeat;; Tetratricopeptide repeat;; Tetratricopeptide repeat;; Tetratricopeptide repeat;; Tetratricopeptide repeat;; Tetratricopeptide repeat;; Tetratricopeptide repeat;; Anaphase-promoting complex, cyclosome, subunit 3;; Tetratricopeptide repeat;; Soluble NSF attachment protein, SNAP;;…	--	Z	Cytoskeleton	PREDICTED: nephrocystin-3-like [Setaria italica]
Seita.1G006000	Seita.1G006000	0.04403	9	0.029833	8	0.078583	11	2.77636	360	3.80657	615	4.05666	540	1.71146e-12	-5.73256	down	--	--	Biological Process: microtubule cytoskeleton organization (GO:0000226);; Biological Process: preprophase band assembly (GO:0000913);; Molecular Function: calcium ion binding (GO:0005509);; Cellular Component: nucleus (GO:0005634);; Cellular Component: spindle (GO:0005819);; Biological Process: cell adhesion (GO:0007155);; Cellular Component: phragmoplast (GO:0009524);; Biological Process: unidime…	K11583|5.93691e-117|sita:101776663|probable serine/threonine-protein phosphatase 2A regulatory subunit B'' subunit TON2-like; K11583 serine/threonine-protein phosphatase 2A regulatory subunit B'' (A)	mRNA surveillance pathway (ko03015)	[A]	RNA processing and modification	EF-hand domain pair;; EF hand;; EF-hand domain;; EF-hand domain pair;; EF hand	Probable serine/threonine-protein phosphatase 2A regulatory subunit B&apos;&apos; subunit TON2 GN=At5g18580 OS=Arabidopsis thaliana (Mouse-ear cress) PE=1 SV=1	T	Signal transduction mechanisms	PREDICTED: probable serine/threonine-protein phosphatase 2A regulatory subunit B&apos;&apos; subunit TON2-like [Setaria italica]
Seita.1G006100	Seita.1G006100	0.052566	6	0.145294	21	0.4612	35	0.417043	45	0.123422	17	0.659578	54	--	--	--	--	--	--	--	--	[T]	Signal transduction mechanisms	NB-ARC domain	Putative disease resistance RPP13-like protein 2 GN=RPP13L2 OS=Arabidopsis thaliana (Mouse-ear cress) PE=3 SV=1	T	Signal transduction mechanisms	hypothetical protein SORBIDRAFT_04g007890 [Sorghum bicolor]
Seita.1G006200	Seita.1G006200	0.400958	48	0.218595	32	0.680708	60	0.401569	37	0.683295	43	0.277534	34	0.992875	0.321322	normal	--	--	Biological Process: pyrimidine ribonucleotide biosynthetic process (GO:0009220);; Cellular Component: plastid (GO:0009536);;	--	--	--	--	--	--	S	Function unknown	PREDICTED: uncharacterized protein LOC101775014 isoform X2 [Setaria italica]
Seita.1G006300	Seita.1G006300	2.23316	251	1.53211	215	1.29844	161	1.49121	160	0.714978	81	1.19726	154	0.867153	0.620558	normal	--	--	Biological Process: pyrimidine ribonucleotide biosynthetic process (GO:0009220);; Cellular Component: plastid (GO:0009536);;	--	--	--	--	--	--	S	Function unknown	PREDICTED: uncharacterized protein LOC101776113 [Setaria italica]
Seita.1G006400	Seita.1G006400	0.029957	4	0	0	0	0	0.044778	7	0	0	0	0	--	--	--	--	--	--	--	--	[T]	Signal transduction mechanisms	NB-ARC domain;; Leucine Rich repeats (2 copies)	Putative late blight resistance protein homolog R1B-14 GN=R1B-14 OS=Solanum demissum (Wild potato) PE=3 SV=1	T	Signal transduction mechanisms	hypothetical protein SORBIDRAFT_04g007890 [Sorghum bicolor]
Seita.1G006500	Seita.1G006500	0	0	0	0	0	0	0.058554	2	0.069014	3	0	0	--	--	--	--	--	--	--	--	--	--	--	--	--	--	--
Seita.1G006600	Seita.1G006600	0.299283	15	0	0	0.068068	4	0	0	0.132337	8	0.103448	6	--	--	--	--	--	Biological Process: biosynthetic process (GO:0009058);; Cellular Component: cytoplasmic membrane-bounded vesicle (GO:0016023);; Molecular Function: strictosidine synthase activity (GO:0016844);;	--	--	[R]	General function prediction only	--	Protein STRICTOSIDINE SYNTHASE-LIKE 2 {ECO:0000303|PubMed:10777701} (Precursor) OS=Arabidopsis thaliana (Mouse-ear cress) PE=2 SV=1	R	General function prediction only	PREDICTED: strictosidine synthase 3-like [Setaria italica]
Seita.1G006700	Seita.1G006700	0	0	0	0	0	0	0	0	0	0	0	0	--	--	--	--	--	Cellular Component: intracellular (GO:0005622);; Molecular Function: zinc ion binding (GO:0008270);;	--	--	--	--	CCT motif	Zinc finger protein CONSTANS-LIKE 12 GN=COL12 OS=Arabidopsis thaliana (Mouse-ear cress) PE=2 SV=2	S	Function unknown	hypothetical protein SORBIDRAFT_04g000820 [Sorghum bicolor]
Seita.1G006800	Seita.1G006800	0	0	0	0	0	0	0	0	0	0	0	0	--	--	--	--	--	Molecular Function: transferase activity, transferring phosphorus-containing groups (GO:0016772);;	--	--	[R]	General function prediction only	Leucine Rich repeats (2 copies);; Leucine rich repeat;; Leucine Rich Repeat;; Leucine Rich repeat;; Leucine rich repeat;; Leucine rich repeat N-terminal domain	Receptor-like protein 2 (Precursor) GN=RLP2 OS=Arabidopsis thaliana (Mouse-ear cress) PE=2 SV=1	S	Function unknown	PREDICTED: tyrosine-sulfated glycopeptide receptor 1-like [Setaria italica]
Seita.1G006900	Seita.1G006900	0.021042	2	0.037437	4	0	0	0.046681	4	0.064988	7	0.018856	2	--	--	--	--	--	Molecular Function: nucleotide binding (GO:0000166);; Molecular Function: protein kinase activity (GO:0004672);; Cellular Component: membrane (GO:0016020);; Molecular Function: signaling receptor activity (GO:0038023);;	--	--	[R]	General function prediction only	Leucine Rich repeats (2 copies);; Leucine rich repeat;; Leucine Rich Repeat;; Leucine Rich repeat;; Leucine rich repeat	Receptor-like protein 2 (Precursor) GN=RLP2 OS=Arabidopsis thaliana (Mouse-ear cress) PE=2 SV=1	S	Function unknown	PREDICTED: tyrosine-sulfated glycopeptide receptor 1-like [Setaria italica]
Seita.1G007000	Seita.1G007000	5.91908	466	0.99915	104	1.28933	115	2.99497	237	2.64131	250	2.53698	208	1	-0.0899881	normal	--	--	Cellular Component: mitochondrion (GO:0005739);;	--	--	[R]	General function prediction only	RNA recognition motif. (a.k.a. RRM, RBD, or RNP domain)	Glycine-rich RNA-binding protein 2, mitochondrial (Precursor) GN=At4g13850 OS=Arabidopsis thaliana (Mouse-ear cress) PE=1 SV=1	R	General function prediction only	PREDICTED: glycine-rich RNA-binding protein 3, mitochondrial-like isoform X2 [Setaria italica]
Seita.1G007100	Seita.1G007100	0	0	0	0	0	0	0	0	0	0	0	0	--	--	--	--	--	Molecular Function: peptide receptor activity (GO:0001653);; Molecular Function: protein serine/threonine kinase activity (GO:0004674);; Molecular Function: transmembrane signaling receptor activity (GO:0004888);; Molecular Function: ATP binding (GO:0005524);; Biological Process: protein phosphorylation (GO:0006468);; Biological Process: response to wounding (GO:0009611);; Cellular Component: int…	--	--	[R]	General function prediction only	Leucine rich repeat;; Leucine Rich repeats (2 copies);; Leucine Rich Repeat;; Leucine Rich repeat;; Leucine rich repeat;; Leucine rich repeat N-terminal domain	Tyrosine-sulfated glycopeptide receptor 1 GN=PSYR1 OS=Arabidopsis thaliana (Mouse-ear cress) PE=2 SV=1	S	Function unknown	PREDICTED: tyrosine-sulfated glycopeptide receptor 1-like [Setaria italica]
Seita.1G007200	Seita.1G007200	294.207	24398	65.8545	7197	60.1166	5616	44.6363	3715	39.132	3896	39.5184	3415	0.478171	1.6841	normal	[Q]	Secondary metabolites biosynthesis, transport and catabolism	Molecular Function: monooxygenase activity (GO:0004497);; Molecular Function: iron ion binding (GO:0005506);; Biological Process: tryptophan catabolic process (GO:0006569);; Biological Process: fatty acid metabolic process (GO:0006631);; Molecular Function: electron carrier activity (GO:0009055);; Biological Process: response to wounding (GO:0009611);; Biological Process: indoleacetic acid biosyn…	K10528|0|sita:101777323|allene oxide synthase, chloroplastic-like; K10528 hydroperoxide lyase [EC:4.1.2.-] (A)	alpha-Linolenic acid metabolism (ko00592)	--	--	Cytochrome P450	Linolenate hydroperoxide lyase, chloroplastic {ECO:0000305|PubMed:9701595} (Precursor) OS=Arabidopsis thaliana (Mouse-ear cress) PE=1 SV=1	Q	Secondary metabolites biosynthesis, transport and catabolism	PREDICTED: allene oxide synthase, chloroplastic-like [Setaria italica]
Seita.1G007300	Seita.1G007300	3.72493	266	2.80378	264	3.51812	282	5.38336	376	5.53336	504	4.99358	337	0.861671	-0.565694	normal	[KAD]	Transcription;; RNA processing and modification;; Cell cycle control, cell division, chromosome partitioning	--	--	--	[K]	Transcription	Myb-like DNA-binding domain;; Myb-like DNA-binding domain	Myb-related protein 3R-1 GN=MYB3R-1 OS=Arabidopsis thaliana (Mouse-ear cress) PE=2 SV=1	K	Transcription	PREDICTED: myb-related protein 3R-1-like isoform X1 [Setaria italica]
Seita.1G007400	Seita.1G007400	6.67666	666	5.64845	744	5.49606	633	5.9268	668	7.77432	916	6.81049	787	0.992783	-0.209248	normal	[KAD]	Transcription;; RNA processing and modification;; Cell cycle control, cell division, chromosome partitioning	Molecular Function: DNA binding (GO:0003677);; Molecular Function: chromatin binding (GO:0003682);;	K09420|0|sita:101778961|snRNA-activating protein complex subunit 4-like; K09420 myb proto-oncogene protein (A)	--	[K]	Transcription	Myb-like DNA-binding domain;; Myb-like DNA-binding domain	Myb-related protein 3R-1 GN=MYB3R-1 OS=Arabidopsis thaliana (Mouse-ear cress) PE=2 SV=1	K	Transcription	PREDICTED: snRNA-activating protein complex subunit 4-like isoform X1 [Setaria italica]
Seita.1G007500	Seita.1G007500	0.051741	1	0.119113	3	0.176609	4	0.20101	4	0.08445	2	0	0	--	--	--	[K]	Transcription	Molecular Function: DNA binding (GO:0003677);; Molecular Function: DNA-directed RNA polymerase activity (GO:0003899);; Biological Process: transcription, DNA-templated (GO:0006351);; Cellular Component: chloroplast (GO:0009507);; Molecular Function: protein dimerization activity (GO:0046983);;	K03040|1.0924e-65|sita:19526820|rpoA, W841_p032; RNA polymerase alpha subunit; K03040 DNA-directed RNA polymerase subunit alpha [EC:2.7.7.6] (A)	Purine metabolism (ko00230);; Pyrimidine metabolism (ko00240);; RNA polymerase (ko03020)	--	--	RNA polymerase Rpb3/RpoA insert domain	DNA-directed RNA polymerase subunit alpha {ECO:0000255|HAMAP-Rule:MF_00059} OS=Sorghum bicolor (Sorghum) PE=3 SV=1	K	Transcription	RNA polymerase alpha subunit [Setaria italica]
Seita.1G007600	Seita.1G007600	0.269902	12	0.026376	2	0.036756	2	0	0	0	0	0	0	--	--	--	--	--	Molecular Function: protein serine/threonine kinase activity (GO:0004674);; Molecular Function: protein tyrosine kinase activity (GO:0004713);; Molecular Function: ATP binding (GO:0005524);; Biological Process: protein phosphorylation (GO:0006468);; Cellular Component: cytoplasmic membrane-bounded vesicle (GO:0016023);;	--	--	[T]	Signal transduction mechanisms	--	Probable receptor-like protein kinase At1g11050 (Precursor) GN=At1g11050 OS=Arabidopsis thaliana (Mouse-ear cress) PE=2 SV=1	T	Signal transduction mechanisms	PREDICTED: uncharacterized protein LOC101779522 [Setaria italica]
Seita.1G007700	Seita.1G007700	3.69325	361	1.02932	137	0.272848	32	0.304267	36	0.682777	69	0.849132	96	0.783772	1.30307	normal	[O]	Posttranslational modification, protein turnover, chaperones	Molecular Function: serine-type endopeptidase activity (GO:0004252);; Cellular Component: cell wall (GO:0005618);; Biological Process: proteolysis (GO:0006508);; Cellular Component: cytoplasmic membrane-bounded vesicle (GO:0016023);; Molecular Function: identical protein binding (GO:0042802);; Biological Process: negative regulation of catalytic activity (GO:0043086);;	--	--	--	--	Subtilase family;; Peptidase inhibitor I9;; PA domain	Subtilisin-like protease SBT3.3 {ECO:0000303|PubMed:16193095} (Precursor) OS=Arabidopsis thaliana (Mouse-ear cress) PE=2 SV=1	O	Posttranslational modification, protein turnover, chaperones	PREDICTED: subtilisin-like protease-like [Setaria italica]
Seita.1G007800	Seita.1G007800	352.515	10981	6.80042	280	5.24065	184	9.14016	286	8.12969	305	4.75681	155	0.793436	3.81381	normal	--	--	Biological Process: microtubule cytoskeleton organization (GO:0000226);; Molecular Function: Rho guanyl-nucleotide exchange factor activity (GO:0005089);; Cellular Component: nucleus (GO:0005634);; Cellular Component: cytoplasm (GO:0005737);; Cellular Component: microtubule associated complex (GO:0005875);; Biological Process: pollen tube growth (GO:0009860);; Biological Process: root hair cell d…	K10418|1.29458e-52|sita:101780022|dynein light chain LC6, flagellar outer arm-like; K10418 dynein light chain LC8-type (A)	--	[Z]	Cytoskeleton	Dynein light chain type 1	Dynein 8 kDa light chain, flagellar outer arm OS=Chlamydomonas reinhardtii (Chlamydomonas smithii) PE=1 SV=1	Z	Cytoskeleton	PREDICTED: dynein light chain LC6, flagellar outer arm-like [Setaria italica]
Seita.1G007900	Seita.1G007900	182.447	13588	41.5071	4068	33.3381	2762	13.7369	1014	15.7877	1396	17.1341	1304	0.298396	2.38731	normal	--	--	--	--	--	--	--	Protein of unknown function (DUF295)	Putative F-box protein At3g25750 GN=At3g25750 OS=Arabidopsis thaliana (Mouse-ear cress) PE=4 SV=2	R	General function prediction only	PREDICTED: uncharacterized protein LOC101780429 [Setaria italica]
Seita.1G008000	Seita.1G008000	0	0	0	0	0	0	0	0	0	0	0	0	--	--	--	--	--	--	--	--	--	--	Protein of unknown function (DUF295)	--	R	General function prediction only	PREDICTED: uncharacterized protein LOC103628490 [Zea mays]
Seita.1G008100	Seita.1G008100	13.5079	717	6.55103	455	6.73798	400	4.92252	262	4.73879	299	5.00825	276	0.532109	0.883659	normal	[S]	Function unknown	Biological Process: stem vascular tissue pattern formation (GO:0010222);; Cellular Component: membrane (GO:0016020);;	--	--	--	--	Protein of unknown function (DUF502)	--	S	Function unknown	PREDICTED: uncharacterized protein LOC101780835 [Setaria italica]
Seita.1G008200	Seita.1G008200	0.086738	5	0.046183	3	0.038504	3	0.128065	6	0	0	0.041212	2	--	--	--	--	--	Cellular Component: extracellular region (GO:0005576);; Cellular Component: cell wall (GO:0005618);; Biological Process: plant-type cell wall organization (GO:0009664);; Cellular Component: membrane (GO:0016020);; Cellular Component: cytoplasmic membrane-bounded vesicle (GO:0016023);;	--	--	--	--	Pollen allergen;; Rare lipoprotein A (RlpA)-like double-psi beta-barrel	Expansin-A23 (Precursor) OS=Oryza sativa subsp. japonica (Rice) PE=2 SV=2	R	General function prediction only	PREDICTED: expansin-A23-like [Setaria italica]
Seita.1G008300	Seita.1G008300	0.146168	6	0.074607	4	0.130936	6	0	0	0	0	0	0	--	--	--	--	--	Cellular Component: extracellular region (GO:0005576);; Cellular Component: cell wall (GO:0005618);; Biological Process: plant-type cell wall organization (GO:0009664);; Cellular Component: membrane (GO:0016020);; Cellular Component: cytoplasmic membrane-bounded vesicle (GO:0016023);;	--	--	--	--	Pollen allergen;; Rare lipoprotein A (RlpA)-like double-psi beta-barrel	Expansin-A24 (Precursor) OS=Oryza sativa subsp. japonica (Rice) PE=2 SV=2	R	General function prediction only	PREDICTED: expansin-A24-like [Setaria italica]
Seita.1G008400	Seita.1G008400	74.7231	6867	30.492	3694	31.741	3285	3.01886	294	3.04283	355	2.20038	217	4.0468e-10	3.97544	up	[R]	General function prediction only	Biological Process: cell division (GO:0051301);;	K03363|0|sita:101782034|anaphase-promoting complex subunit cdc20-like; K03363 cell division cycle 20, cofactor of APC complex (A)	Ubiquitin mediated proteolysis (ko04120)	[DO]	Cell cycle control, cell division, chromosome partitioning;; Posttranslational modification, protein turnover, chaperones	WD domain, G-beta repeat;; Eukaryotic translation initiation factor eIF2A	Cell division cycle 20.1, cofactor of APC complex GN=F17M5.30 OS=Arabidopsis thaliana (Mouse-ear cress) PE=1 SV=1	D	Cell cycle control, cell division, chromosome partitioning	PREDICTED: anaphase-promoting complex subunit cdc20-like [Setaria italica]
Seita.1G008500	Seita.1G008500	0	0	0	0	0	0	0	0	0	0	0	0	--	--	--	--	--	Cellular Component: extracellular region (GO:0005576);; Cellular Component: cell wall (GO:0005618);; Biological Process: plant-type cell wall organization (GO:0009664);; Cellular Component: membrane (GO:0016020);; Cellular Component: cytoplasmic membrane-bounded vesicle (GO:0016023);;	--	--	--	--	Pollen allergen;; Rare lipoprotein A (RlpA)-like double-psi beta-barrel	Expansin-A13 (Precursor) OS=Oryza sativa subsp. japonica (Rice) PE=2 SV=2	R	General function prediction only	PREDICTED: expansin-A13-like [Setaria italica]
Seita.1G008600	Seita.1G008600	13.609	812	19.2592	1514	20.378	1369	10.8247	648	10.1303	726	11.8415	736	0.476733	0.830002	normal	[U]	Intracellular trafficking, secretion, and vesicular transport	Biological Process: rRNA processing (GO:0006364);; Biological Process: proteolysis (GO:0006508);; Molecular Function: serine-type peptidase activity (GO:0008236);; Cellular Component: plastid envelope (GO:0009526);; Cellular Component: chloroplast thylakoid membrane (GO:0009535);; Biological Process: chloroplast relocation (GO:0009902);; Biological Process: thylakoid membrane organization (GO:001…	K03100|8.78713e-167|sita:101782449|chloroplast processing peptidase-like; K03100 signal peptidase I [EC:3.4.21.89] (A)	Protein export (ko03060)	[O]	Posttranslational modification, protein turnover, chaperones	Signal peptidase, peptidase S26;; Peptidase S24-like	Chloroplast processing peptidase (Precursor) GN=PLSP1 OS=Arabidopsis thaliana (Mouse-ear cress) PE=2 SV=2	O	Posttranslational modification, protein turnover, chaperones	PREDICTED: chloroplast processing peptidase-like [Setaria italica]
Seita.1G008700	Seita.1G008700	2.4347	241	0.67612	92	0.815493	94	0.89766	86	0.742679	76	0.580208	64	0.718407	0.869323	normal	[D]	Cell cycle control, cell division, chromosome partitioning	Molecular Function: ATP binding (GO:0005524);; Cellular Component: cytoplasm (GO:0005737);; Biological Process: tRNA processing (GO:0008033);; Biological Process: chloroplast organization (GO:0009658);; Biological Process: embryo development ending in seed dormancy (GO:0009793);; Biological Process: suspensor development (GO:0010098);; Molecular Function: ligase activity, forming carbon-nitrogen …	--	--	--	--	PP-loop family	tRNA(Ile)-lysidine synthase, chloroplastic {ECO:0000255|HAMAP-Rule:MF_01161} OS=Mesostigma viride (Green alga) PE=3 SV=1	R	General function prediction only	PREDICTED: uncharacterized protein LOC101781134 [Setaria italica]
Seita.1G008800	Seita.1G008800	5.35408	413	1.52747	158	1.27639	117	1.61028	126	1.74104	159	1.71569	134	0.837396	0.659892	normal	[O]	Posttranslational modification, protein turnover, chaperones	Molecular Function: ATP binding (GO:0005524);; Biological Process: ATP catabolic process (GO:0006200);; Cellular Component: chloroplast (GO:0009507);; Molecular Function: ATPase activity (GO:0016887);; Biological Process: protein metabolic process (GO:0019538);;	--	--	[O]	Posttranslational modification, protein turnover, chaperones	Ankyrin repeats (3 copies);; Ankyrin repeat;; Ankyrin repeats (many copies);; Ankyrin repeat;; Ankyrin repeats (many copies);; ATPase family associated with various cellular activities (AAA);; AAA domain;; Magnesium chelatase, subunit ChlI	Protein cfxQ homolog GN=cfxQ OS=Cyanidioschyzon merolae (Red alga) PE=3 SV=2	O	Posttranslational modification, protein turnover, chaperones	PREDICTED: caseinolytic peptidase B protein homolog [Setaria italica]
Seita.1G008900	Seita.1G008900	2.25822	315	1.0534	178	1.12759	161	1.49191	187	1.46645	222	0.86134	128	0.992981	0.265052	normal	--	--	--	--	--	[R]	General function prediction only	PPR repeat family;; PPR repeat;; PPR repeat;; Pentatricopeptide repeat domain;; Evolutionarily conserved signalling intermediate in Toll pathway;; Tetratricopeptide repeat;; Tetratricopeptide repeat;; Anaphase-promoting complex, cyclosome, subunit 3;; Tetratricopeptide repeat	Pentatricopeptide repeat-containing protein At3g16010 GN=At3g16010 OS=Arabidopsis thaliana (Mouse-ear cress) PE=2 SV=1	R	General function prediction only	PREDICTED: pentatricopeptide repeat-containing protein At3g16010-like isoform X1 [Setaria italica]
Seita.1G009000	Seita.1G009000	27.4177	1191	10.6407	609	8.99205	440	9.49857	414	6.5644	343	10.8694	492	0.52331	0.781338	normal	[A]	RNA processing and modification	Cellular Component: commitment complex (GO:0000243);; Biological Process: spliceosomal snRNP assembly (GO:0000387);; Biological Process: mRNA 5'-splice site recognition (GO:0000395);; Molecular Function: mRNA binding (GO:0003729);; Cellular Component: U1 snRNP (GO:0005685);; Molecular Function: zinc ion binding (GO:0008270);; Molecular Function: U1 snRNA binding (GO:0030619);; Cellular Component:…	K11095|7.81922e-66|sita:101781526|U1 small nuclear ribonucleoprotein C-1-like; K11095 U1 small nuclear ribonucleoprotein C (A)	Spliceosome (ko03040)	[A]	RNA processing and modification	U1 zinc finger	U1 small nuclear ribonucleoprotein C-1 {ECO:0000255|HAMAP-Rule:MF_03153} GN=Sb04g009880 OS=Sorghum bicolor (Sorghum) PE=3 SV=1	A	RNA processing and modification	PREDICTED: LOW QUALITY PROTEIN: U1 small nuclear ribonucleoprotein C-1-like [Setaria italica]
Seita.1G009100	Seita.1G009100	3.26185	169	1.65835	118	1.95508	113	2.74154	159	2.41833	136	4.16817	240	0.965286	-0.455183	normal	[E]	Amino acid transport and metabolism	Biological Process: tryptophan biosynthetic process (GO:0000162);; Molecular Function: phosphoribosylanthranilate isomerase activity (GO:0004640);; Cellular Component: chloroplast (GO:0009507);;	K01817|0|sita:101784063|n-(5'-phosphoribosyl)anthranilate isomerase 1, chloroplastic-like; K01817 phosphoribosylanthranilate isomerase [EC:5.3.1.24] (A)	Phenylalanine, tyrosine and tryptophan biosynthesis (ko00400);; Biosynthesis of amino acids (ko01230)	[E]	Amino acid transport and metabolism	N-(5'phosphoribosyl)anthranilate (PRA) isomerase	N-(5&apos;-phosphoribosyl)anthranilate isomerase 1, chloroplastic (Precursor) GN=F24B9.11 OS=Arabidopsis thaliana (Mouse-ear cress) PE=2 SV=1	E	Amino acid transport and metabolism	PREDICTED: n-(5&apos;-phosphoribosyl)anthranilate isomerase 1, chloroplastic-like isoform X2 [Setaria italica]
Seita.1G009200	Seita.1G009200	36.3724	1637	16.7967	998	15.845	806	23.3673	1059	23.547	1277	19.2619	906	1	0.0610712	normal	--	--	Molecular Function: nucleic acid binding (GO:0003676);; Cellular Component: nucleus (GO:0005634);; Cellular Component: membrane (GO:0016020);;	--	--	[U]	Intracellular trafficking, secretion, and vesicular transport	Reticulon	Reticulon-like protein B2 GN=F8L21.10 OS=Arabidopsis thaliana (Mouse-ear cress) PE=1 SV=1	U	Intracellular trafficking, secretion, and vesicular transport	PREDICTED: reticulon-like protein B2-like [Setaria italica]
Seita.1G009300	Seita.1G009300	0	0	0	0	0	0	0	0	0	0	0	0	--	--	--	--	--	--	--	--	--	--	Late embryogenesis abundant protein	--	S	Function unknown	PREDICTED: uncharacterized protein LOC101785145 [Setaria italica]
Seita.1G009400	Seita.1G009400	0	0	0	0	0	0	0.4933	4	0	0	0.018169	2	--	--	--	--	--	Molecular Function: ionotropic glutamate receptor activity (GO:0004970);; Molecular Function: extracellular-glutamate-gated ion channel activity (GO:0005234);; Biological Process: ion transport (GO:0006811);; Cellular Component: integral component of membrane (GO:0016021);; Cellular Component: cytoplasmic membrane-bounded vesicle (GO:0016023);; Biological Process: ionotropic glutamate receptor si…	K05387|0|sita:101781933|glutamate receptor 2.7-like; K05387 glutamate receptor, ionotropic, plant (A)	--	[PET]	Inorganic ion transport and metabolism;; Amino acid transport and metabolism;; Signal transduction mechanisms	Receptor family ligand binding region;; Ligand-gated ion channel;; Bacterial extracellular solute-binding proteins, family 3;; Periplasmic binding protein	Glutamate receptor 2.7 (Precursor) GN=GLR2.7 OS=Arabidopsis thaliana (Mouse-ear cress) PE=2 SV=3	P	Inorganic ion transport and metabolism	PREDICTED: glutamate receptor 2.7-like [Setaria italica]
Seita.1G009500	Seita.1G009500	31.5003	3074	25.6677	3222	26.4164	2845	27.8525	2709	26.6936	3100	26.8642	2706	0.999605	0.103136	normal	--	--	--	--	--	--	--	--	--	S	Function unknown	PREDICTED: uncharacterized protein LOC101785542 isoform X1 [Setaria italica]
Seita.1G009600	Seita.1G009600	95.4766	4052	94.3746	5278	99.505	4756	120.09	5114	112.538	5733	126.666	5600	0.992783	-0.215062	normal	[R]	General function prediction only	Biological Process: receptor recycling (GO:0001881);; Molecular Function: protein serine/threonine phosphatase activity (GO:0004722);; Cellular Component: multivesicular body (GO:0005771);; Biological Process: ubiquitin-dependent protein catabolic process (GO:0006511);; Biological Process: protein targeting to vacuole (GO:0006623);; Biological Process: membrane fusion (GO:0006944);; Biological Pr…	K18467|1.01515e-136|sita:101786219|vacuolar protein sorting-associated protein 29-like; K18467 vacuolar protein sorting-associated protein 29 (A)	--	[U]	Intracellular trafficking, secretion, and vesicular transport	Calcineurin-like phosphoesterase superfamily domain;; Calcineurin-like phosphoesterase	Vacuolar protein sorting-associated protein 29 GN=At3g47810 OS=Arabidopsis thaliana (Mouse-ear cress) PE=2 SV=1	U	Intracellular trafficking, secretion, and vesicular transport	PREDICTED: vacuolar protein sorting-associated protein 29-like [Setaria italica]
Seita.1G009700	Seita.1G009700	0	0	0	0	0	0	0	0	0	0	0	0	--	--	--	--	--	--	--	--	--	--	--	--	S	Function unknown	hypothetical protein SORBIDRAFT_01g046970 [Sorghum bicolor]
Seita.1G009800	Seita.1G009800	2.70907	194	0.985958	93	0.468883	40	1.46194	104	1.10329	96	2.46925	182	0.996392	-0.312865	normal	--	--	Molecular Function: sequence-specific DNA binding transcription factor activity (GO:0003700);; Biological Process: regulation of transcription, DNA-templated (GO:0006355);; Molecular Function: sequence-specific DNA binding (GO:0043565);;	--	--	--	--	WRKY DNA -binding domain	WRKY transcription factor 22 OS=Arabidopsis thaliana (Mouse-ear cress) PE=2 SV=1	K	Transcription	PREDICTED: probable WRKY transcription factor 27-like [Setaria italica]
Seita.1G009900	Seita.1G009900	0.462239	14	0.374296	15	0.262837	9	0.520893	16	0.96368	35	0.596826	19	--	--	--	--	--	Cellular Component: cytoplasmic membrane-bounded vesicle (GO:0016023);;	--	--	--	--	Protein of unknown function (DUF1070)	Arabinogalactan peptide 16 (Precursor) GN=AGP16 OS=Arabidopsis thaliana (Mouse-ear cress) PE=1 SV=1	R	General function prediction only	PREDICTED: arabinogalactan peptide 16-like [Setaria italica]
Seita.1G010000	Seita.1G010000	0	0	0.038342	3	0	0	0	0	0	0	0	0	--	--	--	--	--	Cellular Component: extracellular region (GO:0005576);; Cellular Component: cell wall (GO:0005618);; Biological Process: plant-type cell wall organization (GO:0009664);; Cellular Component: membrane (GO:0016020);; Cellular Component: cytoplasmic membrane-bounded vesicle (GO:0016023);;	--	--	--	--	Pollen allergen;; Rare lipoprotein A (RlpA)-like double-psi beta-barrel	Expansin-A22 (Precursor) OS=Oryza sativa subsp. japonica (Rice) PE=2 SV=2	R	General function prediction only	PREDICTED: expansin-A23-like [Setaria italica]
Seita.1G010100	Seita.1G010100	0	0	0	0	0	0	0	0	0	0	0	0	--	--	--	--	--	Cellular Component: extracellular region (GO:0005576);; Cellular Component: cell wall (GO:0005618);; Biological Process: plant-type cell wall organization (GO:0009664);; Cellular Component: membrane (GO:0016020);; Cellular Component: cytoplasmic membrane-bounded vesicle (GO:0016023);;	--	--	--	--	Rare lipoprotein A (RlpA)-like double-psi beta-barrel;; Pollen allergen	Expansin-A23 (Precursor) OS=Oryza sativa subsp. japonica (Rice) PE=2 SV=2	R	General function prediction only	PREDICTED: expansin-A22-like [Setaria italica]
Seita.1G010200	Seita.1G010200	0.122727	5	0.06907	3	0.126934	5	0	0	0	0	0	0	--	--	--	--	--	Cellular Component: extracellular region (GO:0005576);; Cellular Component: cell wall (GO:0005618);; Biological Process: plant-type cell wall organization (GO:0009664);; Cellular Component: membrane (GO:0016020);; Cellular Component: cytoplasmic membrane-bounded vesicle (GO:0016023);;	--	--	--	--	Pollen allergen	Expansin-A24 (Precursor) OS=Oryza sativa subsp. japonica (Rice) PE=2 SV=2	R	General function prediction only	PREDICTED: expansin-A23-like [Setaria italica]
Seita.1G010300	Seita.1G010300	3.13396	324	2.40612	326	1.95699	233	2.60806	277	1.99858	259	1.6142	180	0.986625	0.29078	normal	--	--	Cellular Component: mitochondrion (GO:0005739);; Cellular Component: cytoplasmic membrane-bounded vesicle (GO:0016023);;	--	--	--	--	Lines C-terminus	--	S	Function unknown	PREDICTED: uncharacterized protein LOC101753284 isoform X1 [Setaria italica]
Seita.1G010400	Seita.1G010400	3.60083	375	10.8126	1403	13	2331	4.91309	331	5.85062	1023	6.64666	660	0.854402	1.13103	normal	--	--	Biological Process: defense response (GO:0006952);; Molecular Function: ADP binding (GO:0043531);;	--	--	[T]	Signal transduction mechanisms	NB-ARC domain;; Leucine rich repeat;; NACHT domain	Disease resistance protein RGA2 GN=RGA2 OS=Solanum bulbocastanum (Wild potato) PE=1 SV=1	T	Signal transduction mechanisms	PREDICTED: putative disease resistance protein RGA3-like isoform X1 [Setaria italica]
Seita.1G010500	Seita.1G010500	5.12157	230	2.76291	162	2.61864	131	4.0499	238	2.34878	278	0.910823	92	0.995214	-0.22197	normal	[R]	General function prediction only	Biological Process: mRNA splicing, via spliceosome (GO:0000398);; Biological Process: production of siRNA involved in RNA interference (GO:0030422);; Biological Process: production of miRNAs involved in gene silencing by miRNA (GO:0035196);; Biological Process: tRNA 3'-end processing (GO:0042780);; Molecular Function: 3'-tRNA processing endoribonuclease activity (GO:0042781);; Biological Process:…	K00784|0|sita:101759898|nuclear ribonuclease Z-like; K00784 ribonuclease Z [EC:3.1.26.11] (A)	RNA transport (ko03013)	--	--	Beta-lactamase superfamily domain;; Metallo-beta-lactamase superfamily	Nuclear ribonuclease Z GN=NUZ OS=Arabidopsis thaliana (Mouse-ear cress) PE=2 SV=3	R	General function prediction only	PREDICTED: nuclear ribonuclease Z-like isoform X2 [Setaria italica]
Seita.1G010600	Seita.1G010600	10.2974	130	4.68298	78	13.5602	192	53.9998	1527	40.2983	1124	43.9231	1193	2.03009e-08	-3.24308	down	--	--	--	--	--	--	--	--	--	--	--	--
Seita.1G010700	Seita.1G010700	5.08817	289	1.34188	95	1.51204	94	4.57895	278	4.92366	358	3.74815	234	0.680351	-0.90853	normal	--	--	Molecular Function: copper ion binding (GO:0005507);; Cellular Component: mitochondrion (GO:0005739);;	--	--	--	--	--	--	S	Function unknown	PREDICTED: uncharacterized protein LOC101770749 isoform X1 [Setaria italica]
Seita.1G010800	Seita.1G010800	0	0	0.060873	3	0.025608	1	0.257477	9	0.592923	24	0.111554	4	--	--	--	--	--	Biological Process: regulation of transcription, DNA-templated (GO:0006355);; Biological Process: tRNA processing (GO:0008033);; Molecular Function: hydrolase activity (GO:0016787);; Biological Process: posttranscriptional gene silencing by RNA (GO:0035194);; Biological Process: production of small RNA involved in gene silencing by RNA (GO:0070918);;	K00784|1.61161e-139|sbi:SORBI_04g009740|SORBIDRAFT_04g009740, Sb04g009740; hypothetical protein; K00784 ribonuclease Z [EC:3.1.26.11] (A)	RNA transport (ko03013)	--	--	Beta-lactamase superfamily domain	Nuclear ribonuclease Z GN=NUZ OS=Arabidopsis thaliana (Mouse-ear cress) PE=2 SV=3	R	General function prediction only	hypothetical protein SORBIDRAFT_04g009740 [Sorghum bicolor]
Seita.1G010900	Seita.1G010900	0.084214	1	0	0	0.071343	1	0	0	0	0	0	0	--	--	--	--	--	--	--	--	--	--	--	--	--	--	--
Seita.1G011000	Seita.1G011000	2.00727	134	1.74184	153	1.35465	102	1.72789	116	1.95537	157	2.25703	157	0.999228	-0.154471	normal	--	--	--	--	--	--	--	--	Plastid division protein PDV1 GN=PDV1 OS=Arabidopsis thaliana (Mouse-ear cress) PE=1 SV=1	S	Function unknown	PREDICTED: plastid division protein PDV1-like [Setaria italica]
Seita.1G011100	Seita.1G011100	9.83648	1612	32.6524	7859	27.9845	5823	11.4881	1531	17.657	3358	15.0913	1748	0.616862	1.27098	normal	--	--	--	--	--	[T]	Signal transduction mechanisms	NB-ARC domain;; Leucine rich repeat;; AAA domain	Disease resistance protein RGA2 GN=RGA2 OS=Solanum bulbocastanum (Wild potato) PE=1 SV=1	T	Signal transduction mechanisms	PREDICTED: putative disease resistance protein RGA3-like isoform X1 [Setaria italica]
Seita.1G011200	Seita.1G011200	0.128415	2	0.015807	1	0.028502	1	0.283171	5	0.053483	2	0.36992	7	--	--	--	--	--	--	--	--	--	--	--	--	--	--	--
Seita.1G011300	Seita.1G011300	0	0	0	0	0	0	0.741103	44	0	0	0	0	--	--	--	--	--	Cellular Component: cytosol (GO:0005829);; Cellular Component: plasma membrane (GO:0005886);;	--	--	[U]	Intracellular trafficking, secretion, and vesicular transport	--	Exocyst complex component EXO84B GN=EXO84B OS=Arabidopsis thaliana (Mouse-ear cress) PE=1 SV=1	U	Intracellular trafficking, secretion, and vesicular transport	PREDICTED: exocyst complex component 8-like [Setaria italica]
Seita.1G011400	Seita.1G011400	3.08282	343	0.770466	109	0.774878	94	16.5708	838	10.0555	634	8.36167	525	0.0116536	-1.93987	normal	--	--	Biological Process: regulation of transcription, DNA-templated (GO:0006355);; Biological Process: tRNA processing (GO:0008033);; Molecular Function: hydrolase activity (GO:0016787);; Biological Process: posttranscriptional gene silencing by RNA (GO:0035194);; Biological Process: production of small RNA involved in gene silencing by RNA (GO:0070918);;	K00784|1.52729e-92|sita:101759898|nuclear ribonuclease Z-like; K00784 ribonuclease Z [EC:3.1.26.11] (A)	RNA transport (ko03013)	--	--	--	Nuclear ribonuclease Z GN=NUZ OS=Arabidopsis thaliana (Mouse-ear cress) PE=2 SV=3	R	General function prediction only	unknown [Zea mays]
Seita.1G011500	Seita.1G011500	7.68788	400	3.44391	239	3.61427	213	4.7337	282	4.48543	316	4.89341	299	1	-0.103274	normal	[R]	General function prediction only	Biological Process: mRNA splicing, via spliceosome (GO:0000398);; Biological Process: production of siRNA involved in RNA interference (GO:0030422);; Biological Process: production of miRNAs involved in gene silencing by miRNA (GO:0035196);; Biological Process: tRNA 3'-end processing (GO:0042780);; Molecular Function: 3'-tRNA processing endoribonuclease activity (GO:0042781);; Biological Process:…	K00784|0|sita:101759898|nuclear ribonuclease Z-like; K00784 ribonuclease Z [EC:3.1.26.11] (A)	RNA transport (ko03013)	--	--	Beta-lactamase superfamily domain;; Metallo-beta-lactamase superfamily	Nuclear ribonuclease Z GN=NUZ OS=Arabidopsis thaliana (Mouse-ear cress) PE=2 SV=3	R	General function prediction only	PREDICTED: nuclear ribonuclease Z-like [Setaria italica]
Seita.1G011600	Seita.1G011600	6.4961	1372	17.2392	2491	2.57452	552	18.604	1065	13.5368	646	10.8979	655	0.790925	0.85187	normal	--	--	Biological Process: defense response (GO:0006952);; Molecular Function: ADP binding (GO:0043531);;	--	--	[T]	Signal transduction mechanisms	NB-ARC domain;; AAA domain;; Leucine rich repeat	Disease resistance protein RGA2 GN=RGA2 OS=Solanum bulbocastanum (Wild potato) PE=1 SV=1	T	Signal transduction mechanisms	PREDICTED: putative disease resistance protein RGA3-like [Setaria italica]
Seita.1G011700	Seita.1G011700	0	0	0	0	0	0	0	0	0	0	0	0	--	--	--	--	--	--	--	--	--	--	--	--	--	--	--
Seita.1G011800	Seita.1G011800	0.188721	11	0.194431	15	0.138051	9	0.034976	2	0.027553	2	0.098153	6	--	--	--	--	--	Cellular Component: plastid (GO:0009536);;	--	--	--	--	--	--	S	Function unknown	Os02g0261000 [Oryza sativa Japonica Group]
Seita.1G011900	Seita.1G011900	22.8482	1869	18.6757	1979	17.3052	1590	22.9025	1860	19.566	1910	18.8213	1583	1	0.0179604	normal	--	--	--	--	--	--	--	BTB/POZ domain;; BTB And C-terminal Kelch	BTB/POZ domain-containing protein POB1 GN=POB1 OS=Arabidopsis thaliana (Mouse-ear cress) PE=2 SV=2	R	General function prediction only	PREDICTED: BTB/POZ domain-containing protein POB1-like isoform X1 [Setaria italica]
Seita.1G012000	Seita.1G012000	4.05197	404	2.66612	351	2.60621	293	3.45176	346	3.07196	368	2.26612	236	0.999228	0.135435	normal	--	--	Cellular Component: plastid (GO:0009536);;	--	--	--	--	--	Uncharacterized protein At5g41620 GN=At5g41620 OS=Arabidopsis thaliana (Mouse-ear cress) PE=2 SV=2	S	Function unknown	PREDICTED: uncharacterized protein At5g41620-like isoform X1 [Setaria italica]
Seita.1G012100	Seita.1G012100	2.9238	227	2.74637	281	2.71579	238	3.04396	238	2.65545	248	2.78723	226	1	0.0705059	normal	--	--	Biological Process: organ development (GO:0048513);;	--	--	--	--	F-box-like;; F-box domain	F-box/kelch-repeat protein At3g61590 GN=At3g61590 OS=Arabidopsis thaliana (Mouse-ear cress) PE=1 SV=1	R	General function prediction only	PREDICTED: F-box/kelch-repeat protein At3g61590-like [Setaria italica]
Seita.1G012200	Seita.1G012200	2.65815	472	1.78615	436	1.46466	305	2.90267	523	1.64023	363	1.99879	385	1	-0.0981247	normal	--	--	--	--	--	--	--	BAG domain	BAG family molecular chaperone regulator 6 GN=T3F17.11 OS=Arabidopsis thaliana (Mouse-ear cress) PE=1 SV=1	T	Signal transduction mechanisms	PREDICTED: BAG family molecular chaperone regulator 6-like [Setaria italica]
Seita.1G012300	Seita.1G012300	0	0	0	0	0	0	0	0	0	0	0.055051	2	--	--	--	--	--	--	--	--	--	--	--	--	S	Function unknown	hypothetical protein OsJ_23822 [Oryza sativa Japonica Group]
Seita.1G012400	Seita.1G012400	117.635	4156	48.6443	2265	48.0853	1914	42.0385	1491	37.8818	1607	34.9854	1288	0.32773	0.892707	normal	[J]	Translation, ribosomal structure and biogenesis	Molecular Function: RNA binding (GO:0003723);; Molecular Function: structural constituent of ribosome (GO:0003735);; Cellular Component: nucleus (GO:0005634);; Cellular Component: ribosome (GO:0005840);; Biological Process: rRNA processing (GO:0006364);; Biological Process: translation (GO:0006412);; Biological Process: response to cold (GO:0009409);; Cellular Component: chloroplast stroma (GO:00…	K02888|3.07281e-68|sita:101763816|50S ribosomal protein L21, chloroplastic-like; K02888 large subunit ribosomal protein L21 (A)	Ribosome (ko03010)	[J]	Translation, ribosomal structure and biogenesis	Ribosomal prokaryotic L21 protein	50S ribosomal protein L21, chloroplastic (Precursor) GN=RPL21 OS=Arabidopsis thaliana (Mouse-ear cress) PE=2 SV=1	J	Translation, ribosomal structure and biogenesis	PREDICTED: 50S ribosomal protein L21, chloroplastic-like [Setaria italica]
Seita.1G012500	Seita.1G012500	21.1948	2190	9.96211	1357	12.0698	1405	16.6285	1725	28.115	3489	38.573	4153	0.341195	-0.936307	normal	--	--	--	--	--	--	--	--	Probable WRKY transcription factor 19 GN=WRKY19 OS=Arabidopsis thaliana (Mouse-ear cress) PE=2 SV=1	S	Function unknown	PREDICTED: uncharacterized protein LOC101764211 [Setaria italica]
Seita.1G012600	Seita.1G012600	1.34849	16	0.11143	2	0.155813	2	2.41266	28	2.19029	30	0.711066	9	--	--	--	--	--	--	--	--	--	--	--	--	S	Function unknown	PREDICTED: uncharacterized protein LOC101764619 [Setaria italica]
Seita.1G012700	Seita.1G012700	11.9182	1252	49.072	6623	46.4227	5703	44.0266	4838	44.7697	5955	36.7485	4297	0.999228	-0.0972031	normal	[R]	General function prediction only	--	--	--	[R]	General function prediction only	Ankyrin repeats (many copies);; Ankyrin repeats (3 copies);; Ankyrin repeats (many copies);; Ankyrin repeat;; Ankyrin repeat	Ankyrin repeat-containing protein At2g01680 GN=At2g01680 OS=Arabidopsis thaliana (Mouse-ear cress) PE=2 SV=1	R	General function prediction only	PREDICTED: serine/threonine-protein phosphatase 6 regulatory ankyrin repeat subunit B-like [Setaria italica]
Seita.1G012800	Seita.1G012800	0.283265	38	1.58819	279	1.94329	292	0.122269	17	0.106007	17	0.223998	32	0.111089	3.249	normal	--	--	--	--	--	--	--	Protein of unknown function (DUF3133)	Extra-large guanine nucleotide-binding protein 1 GN=F26B6.11 OS=Arabidopsis thaliana (Mouse-ear cress) PE=1 SV=2	S	Function unknown	PREDICTED: uncharacterized protein LOC101765434 [Setaria italica]
Seita.1G012900	Seita.1G012900	0.307584	22	0.07441	7	0.075924	7	0.139849	10	0.162982	14	0.188892	14	--	--	--	--	--	--	K09273|0|sita:101765841|high mobility group B protein 6-like; K09273 upstream-binding transcription factor (A)	--	[R]	General function prediction only	HMG (high mobility group) box;; HMG-box domain;; CHDNT (NUC034) domain	High mobility group B protein 6 OS=Arabidopsis thaliana (Mouse-ear cress) PE=2 SV=1	R	General function prediction only	PREDICTED: high mobility group B protein 6-like [Setaria italica]
Seita.1G013000	Seita.1G013000	0.59461	7	2.76081	43	3.82776	51	0.799825	10	0.636448	9	0.685389	9	--	--	--	--	--	--	--	--	--	--	--	--	--	--	--
Seita.1G013100	Seita.1G013100	2.05173	110	6.72173	475	3.79023	229	7.67757	413	10.4634	673	5.91124	330	0.653576	-0.759462	normal	--	--	--	--	--	--	--	--	--	S	Function unknown	PREDICTED: uncharacterized protein LOC101766257 [Setaria italica]
Seita.1G013200	Seita.1G013200	0	0	0	0	0	0	0	0	0	0	0	0	--	--	--	--	--	Cellular Component: nucleus (GO:0005634);; Molecular Function: protein dimerization activity (GO:0046983);;	--	--	--	--	Helix-loop-helix DNA-binding domain	Transcription factor SPEECHLESS GN=MFH8.15 OS=Arabidopsis thaliana (Mouse-ear cress) PE=1 SV=1	K	Transcription	PREDICTED: transcription factor SPEECHLESS-like [Setaria italica]
Seita.1G013300	Seita.1G013300	29.9445	2219	46.0619	4521	43.9258	3673	53.3382	3957	38.1202	3388	38.6848	2977	1	0.0295355	normal	[P]	Inorganic ion transport and metabolism	Biological Process: MAPK cascade (GO:0000165);; Biological Process: rRNA processing (GO:0006364);; Biological Process: glycine catabolic process (GO:0006546);; Biological Process: protein targeting to membrane (GO:0006612);; Biological Process: unsaturated fatty acid biosynthetic process (GO:0006636);; Biological Process: oxidoreduction coenzyme metabolic process (GO:0006733);; Biological Process…	--	--	--	--	--	Rhodanese-like domain-containing protein 4, chloroplastic (Precursor) GN=F2N1.31 OS=Arabidopsis thaliana (Mouse-ear cress) PE=1 SV=2	S	Function unknown	PREDICTED: rhodanese-like domain-containing protein 4, chloroplastic-like [Setaria italica]
Seita.1G013400	Seita.1G013400	0	0	0	0	0	0	0	0	0	0	0	0	--	--	--	--	--	Cellular Component: mitochondrion (GO:0005739);; Cellular Component: membrane (GO:0016020);;	--	--	--	--	--	--	S	Function unknown	PREDICTED: uncharacterized protein LOC101767480 [Setaria italica]
Seita.1G013500	Seita.1G013500	72.5478	3903	12.977	920	20.0337	1214	51.1914	2764	43.7068	2823	50.1382	2810	0.888855	-0.538886	normal	--	--	--	--	--	--	--	--	--	R	General function prediction only	PREDICTED: sarcoplasmic reticulum histidine-rich calcium-binding protein-like [Setaria italica]
Seita.1G013600	Seita.1G013600	0	0	0	0	0	0	0	0	0	0	0	0	--	--	--	--	--	Cellular Component: mitochondrion (GO:0005739);; Molecular Function: zinc ion binding (GO:0008270);; Cellular Component: cytoplasmic membrane-bounded vesicle (GO:0016023);;	--	--	[O]	Posttranslational modification, protein turnover, chaperones	Ring finger domain;; RING-H2 zinc finger;; Zinc finger, C3HC4 type (RING finger);; Zinc finger, C3HC4 type (RING finger)	RING-H2 finger protein ATL32 (Precursor) GN=ATL32 OS=Arabidopsis thaliana (Mouse-ear cress) PE=2 SV=3	O	Posttranslational modification, protein turnover, chaperones	PREDICTED: uncharacterized protein LOC101785972 [Setaria italica]
Seita.1G013700	Seita.1G013700	0	0	0	0	0	0	0	0	0	0	0	0	--	--	--	--	--	Cellular Component: mitochondrion (GO:0005739);; Cellular Component: cytoplasmic membrane-bounded vesicle (GO:0016023);; Molecular Function: metal ion binding (GO:0046872);;	--	--	[O]	Posttranslational modification, protein turnover, chaperones	Ring finger domain;; RING-H2 zinc finger;; Zinc finger, C3HC4 type (RING finger);; Zinc finger, C3HC4 type (RING finger)	RING-H2 finger protein ATL17 GN=ATL17 OS=Arabidopsis thaliana (Mouse-ear cress) PE=2 SV=2	O	Posttranslational modification, protein turnover, chaperones	PREDICTED: uncharacterized protein LOC101785972 [Setaria italica]
Seita.1G013800	Seita.1G013800	0.749117	59	0.586192	61	0.452318	41	2.76772	219	2.73595	259	0.703186	58	0.195028	-1.72526	normal	[M]	Cell wall/membrane/envelope biogenesis	Molecular Function: polygalacturonase activity (GO:0004650);; Cellular Component: extracellular region (GO:0005576);; Biological Process: carbohydrate metabolic process (GO:0005975);; Cellular Component: cytoplasmic membrane-bounded vesicle (GO:0016023);;	--	--	--	--	Glycosyl hydrolases family 28;; Pectate lyase superfamily protein;; Right handed beta helix region	Probable polygalacturonase OS=Vitis vinifera (Grape) PE=1 SV=1	R	General function prediction only	PREDICTED: probable polygalacturonase-like [Setaria italica]
Seita.1G013900	Seita.1G013900	95.6514	4510	121.839	7570	112.396	5968	134.694	6373	114.9	6503	98.727	4849	1	0.0415398	normal	--	--	--	K14496|1.9842e-139|sita:101768693|abscisic acid receptor PYL8-like; K14496 abscisic acid receptor PYR/PYL family (A)	Plant hormone signal transduction (ko04075)	--	--	Polyketide cyclase / dehydrase and lipid transport	Abscisic acid receptor PYL8 GN=MFH8.10 OS=Arabidopsis thaliana (Mouse-ear cress) PE=1 SV=1	R	General function prediction only	PREDICTED: abscisic acid receptor PYL8-like [Setaria italica]
Seita.1G014000	Seita.1G014000	22.6164	1124	10.4829	687	10.197	571	14.3033	714	11.4025	681	11.2068	581	0.980822	0.237308	normal	[R]	General function prediction only	Molecular Function: DNA binding (GO:0003677);; Cellular Component: nucleus (GO:0005634);; Molecular Function: zinc ion binding (GO:0008270);; Cellular Component: membrane (GO:0016020);;	K13127|7.15477e-172|sita:101769097|zinc finger CCCH domain-containing protein 15-like; K13127 RING finger protein 113A (A)	--	[O]	Posttranslational modification, protein turnover, chaperones	Zinc finger C-x8-C-x5-C-x3-H type (and similar);; Zinc finger, C3HC4 type (RING finger);; Zinc finger, C3HC4 type (RING finger);; Zinc finger, C3HC4 type (RING finger)	Zinc finger CCCH domain-containing protein 15 GN=OSJNBa0010K08.8-1 OS=Oryza sativa subsp. japonica (Rice) PE=2 SV=1	O	Posttranslational modification, protein turnover, chaperones	PREDICTED: zinc finger CCCH domain-containing protein 15-like [Setaria italica]
Seita.1G014100	Seita.1G014100	8.40375	512	6.08631	486	6.53255	448	5.72798	350	6.62367	488	6.4395	405	0.993602	0.221701	normal	[T]	Signal transduction mechanisms	Molecular Function: protein serine/threonine phosphatase activity (GO:0004722);; Cellular Component: mitochondrion (GO:0005739);; Biological Process: protein dephosphorylation (GO:0006470);; Cellular Component: protein serine/threonine phosphatase complex (GO:0008287);; Molecular Function: metal ion binding (GO:0046872);; Biological Process: root hair elongation (GO:0048767);;	K17506|0|sbi:SORBI_04g009260|SORBIDRAFT_04g009260, Sb04g009260; hypothetical protein; K17506 protein phosphatase 1L [EC:3.1.3.16] (A)	--	[T]	Signal transduction mechanisms	Protein phosphatase 2C;; Protein phosphatase 2C	Probable protein phosphatase 2C 13 GN=OSJNBa0052K15.14 OS=Oryza sativa subsp. japonica (Rice) PE=2 SV=1	T	Signal transduction mechanisms	PREDICTED: probable protein phosphatase 2C 13-like isoform X2 [Setaria italica]
Seita.1G014200	Seita.1G014200	6.28071	784	5.58979	920	4.63482	652	6.38648	800	5.29307	793	5.95158	774	1	-0.017419	normal	--	--	Molecular Function: intracellular cyclic nucleotide activated cation channel activity (GO:0005221);; Molecular Function: inward rectifier potassium channel activity (GO:0005242);; Cellular Component: plasma membrane (GO:0005886);; Biological Process: potassium ion transport (GO:0006813);; Biological Process: calcium ion transport (GO:0006816);; Biological Process: response to fungus (GO:0009620);…	K05391|0|sita:101770569|cyclic nucleotide-gated ion channel 1-like; K05391 cyclic nucleotide gated channel, other eukaryote (A)	Plant-pathogen interaction (ko04626)	[PT]	Inorganic ion transport and metabolism;; Signal transduction mechanisms	Ion transport protein;; Cyclic nucleotide-binding domain	Cyclic nucleotide-gated ion channel 1 GN=CNGC1 OS=Arabidopsis thaliana (Mouse-ear cress) PE=1 SV=1	P	Inorganic ion transport and metabolism	PREDICTED: cyclic nucleotide-gated ion channel 1-like isoform X1 [Setaria italica]
Seita.1G014300	Seita.1G014300	0.092629	4	0.035262	3	0	0	0	0	0.182054	10	0.022153	1	--	--	--	--	--	Molecular Function: intracellular cyclic nucleotide activated cation channel activity (GO:0005221);; Molecular Function: inward rectifier potassium channel activity (GO:0005242);; Cellular Component: plasma membrane (GO:0005886);; Biological Process: potassium ion transport (GO:0006813);; Biological Process: calcium ion transport (GO:0006816);; Biological Process: response to fungus (GO:0009620);…	K05391|6.02495e-143|sita:101770181|cyclic nucleotide-gated ion channel 1-like; K05391 cyclic nucleotide gated channel, other eukaryote (A)	Plant-pathogen interaction (ko04626)	[PT]	Inorganic ion transport and metabolism;; Signal transduction mechanisms	Cyclic nucleotide-binding domain	Cyclic nucleotide-gated ion channel 1 GN=CNGC1 OS=Arabidopsis thaliana (Mouse-ear cress) PE=1 SV=1	P	Inorganic ion transport and metabolism	PREDICTED: cyclic nucleotide-gated ion channel 1-like [Setaria italica]
Seita.1G014400	Seita.1G014400	0	0	0	0	0	0	0.078566	2	0	0	0	0	--	--	--	--	--	--	--	--	--	--	GRF zinc finger	--	--	--	PREDICTED: uncharacterized protein LOC101785524 [Setaria italica]
Seita.1G014500	Seita.1G014500	26.7645	1837	26.4458	2391	26.4422	2044	30.6968	2114	28.2964	2331	25.2107	1802	1	0.0163253	normal	[E]	Amino acid transport and metabolism	Molecular Function: spermidine synthase activity (GO:0004766);; Biological Process: polyamine biosynthetic process (GO:0006596);; Molecular Function: spermine synthase activity (GO:0016768);;	K00797|0|sita:101771514|spermine synthase-like; K00797 spermidine synthase [EC:2.5.1.16] (A)	Cysteine and methionine metabolism (ko00270);; Arginine and proline metabolism (ko00330);; beta-Alanine metabolism (ko00410);; Glutathione metabolism (ko00480)	[E]	Amino acid transport and metabolism	Spermine/spermidine synthase	Spermine synthase GN=MFH8.5 OS=Arabidopsis thaliana (Mouse-ear cress) PE=1 SV=1	E	Amino acid transport and metabolism	PREDICTED: spermine synthase-like [Setaria italica]
Seita.1G014600	Seita.1G014600	6.11767	521	3.53229	397	3.22409	310	4.53281	388	4.54307	465	3.5399	314	1	0.0592323	normal	[S]	Function unknown	Biological Process: RNA methylation (GO:0001510);; Cellular Component: nucleolus (GO:0005730);;	K14847|0|sita:101771908|ribosome production factor 2 homolog; K14847 ribosome production factor 2 (A)	--	[J]	Translation, ribosomal structure and biogenesis	Brix domain	Ribosome production factor 2 homolog OS=Oryza sativa subsp. japonica (Rice) PE=2 SV=1	J	Translation, ribosomal structure and biogenesis	PREDICTED: ribosome production factor 2 homolog [Setaria italica]
Seita.1G014700	Seita.1G014700	0.998872	52	5.74097	393	4.40547	258	4.66955	243	5.29695	330	2.72935	148	1	0.0229977	normal	--	--	--	--	--	--	--	--	--	S	Function unknown	PREDICTED: uncharacterized protein LOC101772315 [Setaria italica]
Seita.1G014800	Seita.1G014800	0.175573	10	43.5047	2965	43.3497	2525	22.762	1181	1.0332	65	5.25844	284	0.665191	1.85759	normal	--	--	Cellular Component: mitochondrion (GO:0005739);;	--	--	--	--	Plant protein of unknown function	--	S	Function unknown	PREDICTED: uncharacterized protein LOC101772721 [Setaria italica]
Seita.1G014900	Seita.1G014900	9.23643	989	10.8648	1612	11.0682	1405	19.7404	1611	9.72462	1295	11.5572	1282	1	-0.0550456	normal	--	--	--	--	--	--	--	Plant protein of unknown function	UPF0481 protein At3g47200 GN=At3g47200 OS=Arabidopsis thaliana (Mouse-ear cress) PE=2 SV=1	S	Function unknown	PREDICTED: UPF0481 protein At3g47200-like [Setaria italica]
Seita.1G015000	Seita.1G015000	0	0	0	0	0	0	0	0	0	0	0	0	--	--	--	--	--	Molecular Function: DNA binding (GO:0003677);; Cellular Component: nucleus (GO:0005634);; Biological Process: regulation of transcription, DNA-templated (GO:0006355);; Biological Process: positive regulation of cell fate commitment (GO:0010455);; Biological Process: root cap development (GO:0048829);;	--	--	--	--	No apical meristem (NAM) protein	NAC domain-containing protein 76 OS=Oryza sativa subsp. japonica (Rice) PE=2 SV=2	S	Function unknown	hypothetical protein SORBIDRAFT_04g009180 [Sorghum bicolor]
Seita.1G015100	Seita.1G015100	39.8066	3576	61.0071	7849	54.9449	6132	36.8937	3435	31.4801	3657	34.9026	3419	0.631419	0.760574	normal	[R]	General function prediction only	Molecular Function: serine-type endopeptidase activity (GO:0004252);; Biological Process: proteolysis (GO:0006508);; Cellular Component: integral component of membrane (GO:0016021);; Cellular Component: cytoplasmic membrane-bounded vesicle (GO:0016023);;	--	--	[T]	Signal transduction mechanisms	Rhomboid family	--	T	Signal transduction mechanisms	PREDICTED: uncharacterized protein LOC101774218 isoform X1 [Setaria italica]
Seita.1G015200	Seita.1G015200	0.098619	4	0	0	0.039741	2	0	0	0	0	0	0	--	--	--	--	--	--	--	--	--	--	--	--	--	--	--
Seita.1G015300	Seita.1G015300	2.34094	54	1.0411	32	0.721294	19	3.14129	72	2.9776	82	4.14434	99	0.36929	-1.32232	normal	--	--	--	--	--	--	--	VQ motif	--	S	Function unknown	PREDICTED: uncharacterized protein LOC101754250 [Setaria italica]
Seita.1G015400	Seita.1G015400	4.35371	60	2.71501	49	2.31453	36	3.90105	54	0.070977	2	7.31022	104	1	-0.227138	normal	--	--	--	--	--	--	--	VQ motif	--	R	General function prediction only	PREDICTED: uncharacterized protein LOC101754638 [Setaria italica]
Seita.1G015500	Seita.1G015500	4.5742	397	1.73937	180	1.97392	198	3.62392	257	5.30355	391	3.38471	232	0.998351	-0.199142	normal	[T]	Signal transduction mechanisms	Biological Process: protein dephosphorylation (GO:0006470);; Molecular Function: protein tyrosine/serine/threonine phosphatase activity (GO:0008138);; Biological Process: regulation of MAP kinase activity (GO:0043405);;	K14819|2.45649e-153|sita:101775970|probable dual specificity protein phosphatase DDB_G0281963-like; K14819 dual specificity phosphatase 12 [EC:3.1.3.16 3.1.3.48] (A)	--	[V]	Defense mechanisms	--	Probable inactive dual specificity protein phosphatase-like At4g18593 GN=At4g18593 OS=Arabidopsis thaliana (Mouse-ear cress) PE=2 SV=1	V	Defense mechanisms	PREDICTED: probable dual specificity protein phosphatase DDB_G0281963-like isoform X2 [Setaria italica]
Seita.1G015600	Seita.1G015600	0.26559	28	1.53201	132	0.294336	38	0.78431	80	0.58139	68	1.69383	110	0.980669	-0.40016	normal	--	--	--	--	--	--	--	--	--	--	--	--
Seita.1G015700	Seita.1G015700	0	0	0	0	0	0	0	0	0	0	0	0	--	--	--	--	--	--	--	--	--	--	--	--	S	Function unknown	--
Seita.1G015800	Seita.1G015800	0.046517	4	0.015909	2	0.009309	1	0.07463	7	0	0	0	0	--	--	--	--	--	--	--	--	--	--	--	--	S	Function unknown	PREDICTED: seed biotin-containing protein SBP65-like [Setaria italica]
Seita.1G015900	Seita.1G015900	22.1585	2827	9.3008	1564	8.90953	1281	8.91921	1142	6.07649	931	8.50445	1131	0.441399	0.775626	normal	[RTKL]	General function prediction only;; Signal transduction mechanisms;; Transcription;; Replication, recombination and repair	Molecular Function: nucleotide binding (GO:0000166);; Molecular Function: protein kinase activity (GO:0004672);; Cellular Component: membrane (GO:0016020);; Cellular Component: cytoplasmic membrane-bounded vesicle (GO:0016023);; Biological Process: phosphorylation (GO:0016310);;	--	--	--	--	Protein kinase domain;; Leucine Rich repeats (2 copies);; Protein tyrosine kinase;; Leucine rich repeat;; Leucine Rich Repeat;; Leucine Rich repeat;; Leucine rich repeat;; Leucine rich repeat N-terminal domain	Receptor-like protein kinase 5 (Precursor) GN=F21O9.180 OS=Arabidopsis thaliana (Mouse-ear cress) PE=1 SV=1	T	Signal transduction mechanisms	PREDICTED: receptor-like protein kinase 5-like [Setaria italica]
Seita.1G016000	Seita.1G016000	12.4317	989	4.21438	442	5.7441	515	8.25364	659	6.78502	648	9.55355	792	0.999228	-0.148135	normal	--	--	Cellular Component: cell wall (GO:0005618);; Cellular Component: mitochondrion (GO:0005739);; Biological Process: lipid metabolic process (GO:0006629);; Cellular Component: cytoplasmic membrane-bounded vesicle (GO:0016023);; Molecular Function: hydrolase activity, acting on ester bonds (GO:0016788);;	--	--	--	--	GDSL-like Lipase/Acylhydrolase	GDSL esterase/lipase At5g45910 (Precursor) GN=At5g45910 OS=Arabidopsis thaliana (Mouse-ear cress) PE=2 SV=1	R	General function prediction only	esterase [Zea mays]
Seita.1G016100	Seita.1G016100	40.4807	3957	29.8824	3850	28.4025	3127	37.6732	3696	37.1245	4357	42.8809	4367	0.993602	-0.193614	normal	[BK]	Chromatin structure and dynamics;; Transcription	--	--	--	[K]	Transcription	Bromodomain	Transcription factor GTE4 GN=GTE4 OS=Arabidopsis thaliana (Mouse-ear cress) PE=2 SV=1	K	Transcription	PREDICTED: transcription factor GTE4-like [Setaria italica]
Seita.1G016200	Seita.1G016200	4.85297	519	2.26899	311	2.57728	292	2.58277	267	2.45407	316	3.17175	354	0.992981	0.230631	normal	[BK]	Chromatin structure and dynamics;; Transcription	--	--	--	[K]	Transcription	Bromodomain	Transcription factor GTE4 GN=GTE4 OS=Arabidopsis thaliana (Mouse-ear cress) PE=2 SV=1	K	Transcription	PREDICTED: transcription factor GTE4-like isoform X1 [Setaria italica]
Seita.1G016300	Seita.1G016300	0	0	0	0	0	0	0	0	0	0	0.165152	4	--	--	--	--	--	--	--	--	--	--	--	--	--	--	hypothetical protein SORBIDRAFT_04g009040 [Sorghum bicolor]
Seita.1G016400	Seita.1G016400	0	0	0.023391	2	0.054735	4	0.030717	2	0.024961	2	0.034351	3	--	--	--	--	--	Cellular Component: mitochondrion (GO:0005739);;	--	--	--	--	Transferase family	Benzyl alcohol O-benzoyltransferase GN=HSR201 OS=Nicotiana tabacum (Common tobacco) PE=1 SV=1	S	Function unknown	PREDICTED: benzyl alcohol O-benzoyltransferase-like [Setaria italica]
Seita.1G016500	Seita.1G016500	2559.48	110486	1983.65	112615	1915.29	92990	1509.76	65343	1351.47	70055	1190.21	53620	0.919877	0.739299	normal	[C]	Energy production and conversion	Biological Process: MAPK cascade (GO:0000165);; Cellular Component: plasma membrane (GO:0005886);; Biological Process: pentose-phosphate shunt (GO:0006098);; Biological Process: rRNA processing (GO:0006364);; Biological Process: protein targeting to membrane (GO:0006612);; Molecular Function: ubiquinol-cytochrome-c reductase activity (GO:0008121);; Biological Process: response to cold (GO:0009409…	K02636|2.18584e-145|sita:101778821|cytochrome b6-f complex iron-sulfur subunit, chloroplastic-like; K02636 cytochrome b6-f complex iron-sulfur subunit [EC:1.10.9.1] (A)	Photosynthesis (ko00195)	[C]	Energy production and conversion	Cytochrome B6-F complex Fe-S subunit;; Rieske [2Fe-2S] domain	Cytochrome b6-f complex iron-sulfur subunit, chloroplastic (Precursor) GN=OSJNBa0058I18.25 OS=Oryza sativa subsp. japonica (Rice) PE=1 SV=1	C	Energy production and conversion	PREDICTED: cytochrome b6-f complex iron-sulfur subunit, chloroplastic-like isoform X2 [Setaria italica]
Seita.1G016600	Seita.1G016600	0.260644	6	0	0	0	0	0	0	0	0	0	0	--	--	--	--	--	--	--	--	--	--	--	--	R	General function prediction only	hypothetical protein ZEAMMB73_044992 [Zea mays]
Seita.1G016700	Seita.1G016700	0	0	0	0	0	0	0	0	0	0	0	0	--	--	--	--	--	Molecular Function: zinc ion binding (GO:0008270);;	--	--	[O]	Posttranslational modification, protein turnover, chaperones	Ring finger domain;; RING-H2 zinc finger;; Zinc finger, C3HC4 type (RING finger)	E3 ubiquitin-protein ligase ATL41 GN=ATL41 OS=Arabidopsis thaliana (Mouse-ear cress) PE=1 SV=1	O	Posttranslational modification, protein turnover, chaperones	putative RING zinc finger domain superfamily protein [Zea mays]
Seita.1G016800	Seita.1G016800	12.5773	539	0	0	0	0	0	0	0	0	0	0	--	--	--	--	--	Molecular Function: zinc ion binding (GO:0008270);;	--	--	[O]	Posttranslational modification, protein turnover, chaperones	Ring finger domain;; RING-H2 zinc finger;; Zinc finger, C3HC4 type (RING finger);; Zinc finger, C3HC4 type (RING finger);; Zinc finger, C3HC4 type (RING finger);; Anaphase-promoting complex subunit 11 RING-H2 finger	RING-H2 finger protein ATL32 (Precursor) GN=ATL32 OS=Arabidopsis thaliana (Mouse-ear cress) PE=2 SV=3	O	Posttranslational modification, protein turnover, chaperones	RING-H2 finger protein ATL5H [Zea mays]
Seita.1G016900	Seita.1G016900	0.253532	7	0	0	0	0	0	0	0	0	0	0	--	--	--	--	--	Molecular Function: zinc ion binding (GO:0008270);;	--	--	[O]	Posttranslational modification, protein turnover, chaperones	Ring finger domain;; Zinc finger, C3HC4 type (RING finger)	RING-H2 finger protein ATL3 GN=ATL3 OS=Arabidopsis thaliana (Mouse-ear cress) PE=2 SV=1	O	Posttranslational modification, protein turnover, chaperones	PREDICTED: E3 ubiquitin-protein ligase EL5-like [Setaria italica]
Seita.1G017000	Seita.1G017000	0	0	0	0	0.070732	2	0	0	0	0	0	0	--	--	--	[U]	Intracellular trafficking, secretion, and vesicular transport	Cellular Component: cell part (GO:0044464);;	K10956|5.18651e-32|cmo:103493234|protein transport protein Sec61 subunit alpha-like; K10956 protein transport protein SEC61 subunit alpha (A)	Protein export (ko03060);; Protein processing in endoplasmic reticulum (ko04141);; Phagosome (ko04145)	[UO]	Intracellular trafficking, secretion, and vesicular transport;; Posttranslational modification, protein turnover, chaperones	Plug domain of Sec61p;; SecY translocase	Protein transport protein Sec61 subunit alpha OS=Pyrenomonas salina PE=2 SV=1	U	Intracellular trafficking, secretion, and vesicular transport	PREDICTED: protein transport protein Sec61 subunit alpha-like [Eucalyptus grandis]
Seita.1G017100	Seita.1G017100	0	0	0	0	0	0	0	0	0	0	0	0	--	--	--	--	--	Cellular Component: mitochondrion (GO:0005739);; Molecular Function: zinc ion binding (GO:0008270);; Cellular Component: cytoplasmic membrane-bounded vesicle (GO:0016023);;	--	--	[O]	Posttranslational modification, protein turnover, chaperones	Ring finger domain;; RING-H2 zinc finger;; Zinc finger, C3HC4 type (RING finger);; Zinc finger, C3HC4 type (RING finger)	RING-H2 finger protein ATL17 GN=ATL17 OS=Arabidopsis thaliana (Mouse-ear cress) PE=2 SV=2	O	Posttranslational modification, protein turnover, chaperones	PREDICTED: putative RING-H2 finger protein ATL35-like [Setaria italica]
Seita.1G017200	Seita.1G017200	0.569823	16	0.26143	10	0.061948	2	0	0	0	0	0.07019	2	--	--	--	[GC]	Carbohydrate transport and metabolism;; Energy production and conversion	Biological Process: salicylic acid metabolic process (GO:0009696);; Biological Process: shoot system morphogenesis (GO:0010016);; Biological Process: benzoate metabolic process (GO:0018874);; Biological Process: glucosinolate biosynthetic process (GO:0019761);; Biological Process: cellular response to water deprivation (GO:0042631);; Biological Process: defense response to bacterium (GO:0042742);…	K13691|2.1162e-98|sbi:SORBI_01g021110|SORBIDRAFT_01g021110, Sb01g021110; hypothetical protein; K13691 pathogen-inducible salicylic acid glucosyltransferase [EC:2.4.1.-] (A)	--	[GC]	Carbohydrate transport and metabolism;; Energy production and conversion	UDP-glucoronosyl and UDP-glucosyl transferase	UDP-glycosyltransferase 74E1 GN=UGT74E1 OS=Arabidopsis thaliana (Mouse-ear cress) PE=3 SV=1	1019		hypothetical protein SORBIDRAFT_01g021110 [Sorghum bicolor]
Seita.1G017300	Seita.1G017300	0	0	0	0	0	0	0	0	0	0	0	0	--	--	--	--	--	Molecular Function: zinc ion binding (GO:0008270);;	--	--	[O]	Posttranslational modification, protein turnover, chaperones	Ring finger domain	RING-H2 finger protein ATL7 GN=ATL7 OS=Arabidopsis thaliana (Mouse-ear cress) PE=2 SV=1	O	Posttranslational modification, protein turnover, chaperones	PREDICTED: E3 ubiquitin-protein ligase EL5-like [Setaria italica]
Seita.1G017400	Seita.1G017400	0	0	0	0	0	0	0	0	0	0	0	0	--	--	--	--	--	Cellular Component: membrane (GO:0016020);; Cellular Component: cytoplasmic membrane-bounded vesicle (GO:0016023);; Molecular Function: metal ion binding (GO:0046872);;	--	--	[O]	Posttranslational modification, protein turnover, chaperones	Ring finger domain;; RING-H2 zinc finger;; Zinc finger, C3HC4 type (RING finger);; Anaphase-promoting complex subunit 11 RING-H2 finger	NEP1-interacting protein-like 1 GN=ATL27 OS=Arabidopsis thaliana (Mouse-ear cress) PE=2 SV=1	O	Posttranslational modification, protein turnover, chaperones	PREDICTED: RING-H2 finger protein ATL2-like [Setaria italica]
Seita.1G017500	Seita.1G017500	0.357225	12	0.045102	2	0	0	0.030014	2	0.100356	5	0	0	--	--	--	--	--	Cellular Component: mitochondrion (GO:0005739);; Molecular Function: zinc ion binding (GO:0008270);; Cellular Component: membrane (GO:0016020);; Cellular Component: cytoplasmic membrane-bounded vesicle (GO:0016023);;	--	--	[O]	Posttranslational modification, protein turnover, chaperones	Ring finger domain;; RING-H2 zinc finger;; Zinc finger, C3HC4 type (RING finger);; Zinc finger, C3HC4 type (RING finger)	RING-H2 finger protein ATL17 GN=ATL17 OS=Arabidopsis thaliana (Mouse-ear cress) PE=2 SV=2	O	Posttranslational modification, protein turnover, chaperones	PREDICTED: RING-H2 finger protein ATL43-like [Setaria italica]
Seita.1G017600	Seita.1G017600	5.11524	427	0.887794	102	1.12939	111	1.64152	118	1.72499	179	1.56262	123	0.943545	0.553294	normal	[C]	Energy production and conversion	Cellular Component: cytoplasmic membrane-bounded vesicle (GO:0016023);; Molecular Function: oxidoreductase activity (GO:0016491);; Biological Process: oxidation-reduction process (GO:0055114);;	--	--	[C]	Energy production and conversion	Aldo/keto reductase family	Probable voltage-gated potassium channel subunit beta OS=Oryza sativa subsp. japonica (Rice) PE=1 SV=2	C	Energy production and conversion	PREDICTED: aldo-keto reductase-like [Setaria italica]
Seita.1G017700	Seita.1G017700	0	0	0	0	0	0	0.130753	4	0.359999	11	0.191808	5	--	--	--	[KL]	Transcription;; Replication, recombination and repair	--	--	--	[O]	Posttranslational modification, protein turnover, chaperones	Ring finger domain;; Zinc finger, C3HC4 type (RING finger)	RING-H2 finger protein ATL32 (Precursor) GN=ATL32 OS=Arabidopsis thaliana (Mouse-ear cress) PE=2 SV=3	O	Posttranslational modification, protein turnover, chaperones	PREDICTED: E3 ubiquitin-protein ligase ATL4-like [Setaria italica]
Seita.1G017800	Seita.1G017800	0	0	0	0	0	0	0	0	0	0	0	0	--	--	--	--	--	--	--	--	--	--	--	--	S	Function unknown	PREDICTED: uncharacterized protein LOC101759517 [Setaria italica]
Seita.1G017900	Seita.1G017900	1.09007	46	0.143812	8	0.085848	4	0.547451	23	0.419897	21	0.967575	42	--	--	--	[KL]	Transcription;; Replication, recombination and repair	Molecular Function: metal ion binding (GO:0046872);;	--	--	[O]	Posttranslational modification, protein turnover, chaperones	Ring finger domain;; RING-H2 zinc finger;; Zinc finger, C3HC4 type (RING finger);; Zinc finger, C3HC4 type (RING finger)	E3 ubiquitin-protein ligase Os04g0590900 OS=Oryza sativa subsp. japonica (Rice) PE=2 SV=2	O	Posttranslational modification, protein turnover, chaperones	PREDICTED: RING-H2 finger protein ATL43-like [Setaria italica]
Seita.1G018000	Seita.1G018000	0	0	0	0	0	0	0	0	0	0	0	0	--	--	--	--	--	Molecular Function: zinc ion binding (GO:0008270);;	--	--	[O]	Posttranslational modification, protein turnover, chaperones	Ring finger domain;; RING-H2 zinc finger;; Zinc finger, C3HC4 type (RING finger)	RING-H2 finger protein ATL32 (Precursor) GN=ATL32 OS=Arabidopsis thaliana (Mouse-ear cress) PE=2 SV=3	O	Posttranslational modification, protein turnover, chaperones	PREDICTED: RING-H2 finger protein ATL34-like [Setaria italica]
Seita.1G018100	Seita.1G018100	0	0	0	0	0	0	0	0	0	0	0	0	--	--	--	--	--	Molecular Function: zinc ion binding (GO:0008270);; Cellular Component: cytoplasmic membrane-bounded vesicle (GO:0016023);;	--	--	[O]	Posttranslational modification, protein turnover, chaperones	Ring finger domain;; RING-H2 zinc finger;; Zinc finger, C3HC4 type (RING finger)	RING-H2 finger protein ATL3 GN=ATL3 OS=Arabidopsis thaliana (Mouse-ear cress) PE=2 SV=1	O	Posttranslational modification, protein turnover, chaperones	PREDICTED: E3 ubiquitin-protein ligase EL5-like [Setaria italica]
Seita.1G018200	Seita.1G018200	0	0	0	0	0	0	0.016105	2	0	0	0.01567	2	--	--	--	--	--	Cellular Component: membrane (GO:0016020);; Cellular Component: cytoplasmic membrane-bounded vesicle (GO:0016023);;	--	--	--	--	Protein of unknown function (DUF2921)	--	R	General function prediction only	PREDICTED: uncharacterized protein LOC101761535 [Setaria italica]
Seita.1G018300	Seita.1G018300	0	0	0	0	0	0	0	0	0	0	0	0	--	--	--	--	--	--	--	--	[O]	Posttranslational modification, protein turnover, chaperones	Ring finger domain;; RING-H2 zinc finger;; Zinc finger, C3HC4 type (RING finger);; Zinc finger, C3HC4 type (RING finger);; Zinc finger, C3HC4 type (RING finger)	RING-H2 finger protein ATL72 GN=ATL72 OS=Arabidopsis thaliana (Mouse-ear cress) PE=2 SV=1	O	Posttranslational modification, protein turnover, chaperones	PREDICTED: E3 ubiquitin-protein ligase EL5-like [Setaria italica]
Seita.1G018400	Seita.1G018400	0	0	0	0	0	0	0	0	0	0	0	0	--	--	--	--	--	Cellular Component: intracellular membrane-bounded organelle (GO:0043231);; Cellular Component: cytoplasmic part (GO:0044444);;	--	--	--	--	Protein of unknown function (DUF2921)	--	R	General function prediction only	PREDICTED: uncharacterized protein LOC101761535 [Setaria italica]
Seita.1G018500	Seita.1G018500	0	0	0	0	0	0	0	0	0	0	0	0	--	--	--	--	--	--	K10523|3.92086e-141|sita:101783773|BTB/POZ and MATH domain-containing protein 1-like; K10523 speckle-type POZ protein (A)	--	[DR]	Cell cycle control, cell division, chromosome partitioning;; General function prediction only	BTB/POZ domain	BTB/POZ and MATH domain-containing protein 1 GN=BPM1 OS=Arabidopsis thaliana (Mouse-ear cress) PE=1 SV=1	D	Cell cycle control, cell division, chromosome partitioning	PREDICTED: BTB/POZ and MATH domain-containing protein 1-like [Setaria italica]
Seita.1G018600	Seita.1G018600	0	0	0	0	0	0	0	0	0	0	0	0	--	--	--	--	--	Cellular Component: cytoplasmic membrane-bounded vesicle (GO:0016023);;	--	--	--	--	Protein of unknown function (DUF2921)	--	R	General function prediction only	PREDICTED: uncharacterized protein LOC101761535 [Setaria italica]
Seita.1G018700	Seita.1G018700	0	0	0	0	0	0	0	0	0	0	0	0	--	--	--	[KL]	Transcription;; Replication, recombination and repair	Molecular Function: zinc ion binding (GO:0008270);; Cellular Component: cytoplasmic membrane-bounded vesicle (GO:0016023);;	--	--	[O]	Posttranslational modification, protein turnover, chaperones	Ring finger domain;; RING-H2 zinc finger;; Zinc finger, C3HC4 type (RING finger)	RING-H2 finger protein ATL32 (Precursor) GN=ATL32 OS=Arabidopsis thaliana (Mouse-ear cress) PE=2 SV=3	O	Posttranslational modification, protein turnover, chaperones	PREDICTED: E3 ubiquitin-protein ligase EL5-like [Setaria italica]
Seita.1G018800	Seita.1G018800	0	0	0	0	0	0	0.077041	3	0	0	0	0	--	--	--	--	--	Molecular Function: zinc ion binding (GO:0008270);;	--	--	[O]	Posttranslational modification, protein turnover, chaperones	Ring finger domain;; RING-H2 zinc finger;; Zinc finger, C3HC4 type (RING finger);; Zinc finger, C3HC4 type (RING finger)	RING-H2 finger protein ATL3 GN=ATL3 OS=Arabidopsis thaliana (Mouse-ear cress) PE=2 SV=1	O	Posttranslational modification, protein turnover, chaperones	PREDICTED: RING-H2 finger protein ATL3-like [Setaria italica]
Seita.1G018900	Seita.1G018900	0	0	0	0	0	0	0	0	0	0	0	0	--	--	--	--	--	--	--	--	--	--	--	--	--	--	--
Seita.1G019000	Seita.1G019000	0.427752	12	0.05443	2	0	0	0.07124	2	0.178848	6	0.13885	5	--	--	--	--	--	--	--	--	--	--	--	--	--	--	--
Seita.1G019100	Seita.1G019100	0.673085	63	0.251681	31	0.293199	31	0.062621	6	0.175399	20	0.070556	7	--	--	--	--	--	Biological Process: metal ion transport (GO:0030001);; Molecular Function: metal ion binding (GO:0046872);;	--	--	[P]	Inorganic ion transport and metabolism	Heavy-metal-associated domain	Heavy metal-associated isoprenylated plant protein 26 (Precursor) GN=F20M13.140 OS=Arabidopsis thaliana (Mouse-ear cress) PE=1 SV=1	P	Inorganic ion transport and metabolism	PREDICTED: neurogenic protein mastermind-like [Setaria italica]
Seita.1G019200	Seita.1G019200	1.67665	53	0.329301	14	0.549136	20	1.79029	56	1.18549	45	1.20967	40	0.808845	-0.751712	normal	[K]	Transcription	Biological Process: RNA splicing, via endonucleolytic cleavage and ligation (GO:0000394);; Molecular Function: translation initiation factor activity (GO:0003743);; Cellular Component: transcription factor TFIIA complex (GO:0005672);; Biological Process: regulation of transcription, DNA-templated (GO:0006355);; Biological Process: transcription initiation from RNA polymerase II promoter (GO:00063…	K03123|4.51998e-75|sita:101780710|transcription initiation factor IIA subunit 2-like; K03123 transcription initiation factor TFIIA small subunit (A)	Basal transcription factors (ko03022)	[K]	Transcription	Transcription initiation factor IIA, gamma subunit;; Transcription initiation factor IIA, gamma subunit, helical domain	Transcription initiation factor IIA subunit 2 GN=OSJNBa0068N01.8 OS=Oryza sativa subsp. japonica (Rice) PE=3 SV=1	K	Transcription	PREDICTED: transcription initiation factor IIA subunit 2-like [Setaria italica]
Seita.1G019300	Seita.1G019300	15.4642	1300	18.7465	2004	21.1412	1982	14.0557	1167	12.9093	1268	13.9198	1210	0.80822	0.556612	normal	[LKJ]	Replication, recombination and repair;; Transcription;; Translation, ribosomal structure and biogenesis	Molecular Function: RNA binding (GO:0003723);; Molecular Function: ATP binding (GO:0005524);; Molecular Function: ATP-dependent helicase activity (GO:0008026);; Cellular Component: chloroplast (GO:0009507);;	--	--	[J]	Translation, ribosomal structure and biogenesis	DEAD/DEAH box helicase;; Helicase conserved C-terminal domain	DEAD-box ATP-dependent RNA helicase 58, chloroplastic (Precursor) OS=Oryza sativa subsp. japonica (Rice) PE=2 SV=2	A	RNA processing and modification	PREDICTED: DEAD-box ATP-dependent RNA helicase 58, chloroplastic-like [Setaria italica]
Seita.1G019400	Seita.1G019400	0.253576	20	0.824667	86	0.887413	79	0.467903	37	0.77221	73	0.414133	34	0.981967	0.436846	normal	[Q]	Secondary metabolites biosynthesis, transport and catabolism	Molecular Function: monooxygenase activity (GO:0004497);; Molecular Function: iron ion binding (GO:0005506);; Molecular Function: electron carrier activity (GO:0009055);; Molecular Function: oxidoreductase activity, acting on paired donors, with incorporation or reduction of molecular oxygen (GO:0016705);; Molecular Function: heme binding (GO:0020037);; Biological Process: oxidation-reduction pro…	--	--	[Q]	Secondary metabolites biosynthesis, transport and catabolism	Cytochrome P450	Cytochrome P450 93A2 GN=CYP93A2 OS=Glycine max (Soybean) PE=2 SV=1	Q	Secondary metabolites biosynthesis, transport and catabolism	PREDICTED: cytochrome P450 93A2-like [Setaria italica]
Seita.1G019500	Seita.1G019500	7.58008	675	9.42842	1105	10.8248	1072	10.9887	982	9.25628	989	13.1843	1194	0.996351	-0.135385	normal	--	--	Cellular Component: plant-type vacuole (GO:0000325);; Molecular Function: calcium ion binding (GO:0005509);; Cellular Component: vacuolar membrane (GO:0005774);; Cellular Component: plasma membrane (GO:0005886);; Cellular Component: integral component of membrane (GO:0016021);; Biological Process: transmembrane transport (GO:0055085);;	--	--	--	--	Sodium/calcium exchanger protein	--	P	Inorganic ion transport and metabolism	PREDICTED: uncharacterized protein LOC101782315 [Setaria italica]
Seita.1G019600	Seita.1G019600	0.672799	31	1.36031	82	0.985954	51	0.257231	12	0.21867	12	0.334529	16	--	--	--	--	--	Molecular Function: sequence-specific DNA binding transcription factor activity (GO:0003700);; Cellular Component: nucleus (GO:0005634);; Biological Process: regulation of transcription, DNA-templated (GO:0006355);; Molecular Function: sequence-specific DNA binding (GO:0043565);;	--	--	--	--	bZIP transcription factor;; Basic region leucine zipper;; bZIP Maf transcription factor	Basic leucine zipper 19 GN=OSJNBa0090H18.24 OS=Oryza sativa subsp. japonica (Rice) PE=2 SV=1	K	Transcription	PREDICTED: transcription factor RF2a-like [Setaria italica]
Seita.1G019700	Seita.1G019700	5.68248	1393	2.11341	663	1.77787	453	3.64358	649	2.98018	900	2.48147	544	0.981764	0.223206	normal	--	--	--	K11000|0|sita:101783139|putative callose synthase 8-like; K11000 callose synthase [EC:2.4.1.-] (A)	--	[M]	Cell wall/membrane/envelope biogenesis	1,3-beta-glucan synthase component;; 1,3-beta-glucan synthase subunit FKS1, domain-1;; Vta1 like	Putative callose synthase 8 GN=MIE1.7 OS=Arabidopsis thaliana (Mouse-ear cress) PE=2 SV=2	M	Cell wall/membrane/envelope biogenesis	PREDICTED: putative callose synthase 8-like isoform X1 [Setaria italica]
Seita.1G019800	Seita.1G019800	0.06	4	0.090982	8	0.078484	6	0	0	0.049145	4	0	0	--	--	--	--	--	--	--	--	--	--	--	--	R	General function prediction only	PREDICTED: uncharacterized protein LOC101783796 [Setaria italica]
Seita.1G019900	Seita.1G019900	29.2975	973	23.8692	1045	24.2627	908	29.9517	998	32.4209	1293	28.9908	1003	0.993602	-0.164634	normal	[O]	Posttranslational modification, protein turnover, chaperones	Biological Process: gluconeogenesis (GO:0006094);; Biological Process: glycolytic process (GO:0006096);; Biological Process: protein folding (GO:0006457);; Biological Process: response to salt stress (GO:0009651);; Cellular Component: cytoplasmic membrane-bounded vesicle (GO:0016023);; Cellular Component: prefoldin complex (GO:0016272);; Biological Process: cortical microtubule organization (GO:0…	K04798|8.41644e-74|sbi:SORBI_04g008790|SORBIDRAFT_04g008790, Sb04g008790; hypothetical protein; K04798 prefoldin beta subunit (A)	--	[O]	Posttranslational modification, protein turnover, chaperones	Prefoldin subunit	--	O	Posttranslational modification, protein turnover, chaperones	PREDICTED: prefoldin subunit 6-like isoform X2 [Setaria italica]
Seita.1G020000	Seita.1G020000	0.062406	1	0.172491	4	0	0	0.18606	3	0	0	0	0	--	--	--	--	--	--	--	--	--	--	--	--	--	--	--
Seita.1G020100	Seita.1G020100	0.674164	138	1.68146	451	1.78855	410	0.751404	154	0.540298	132	0.703057	149	0.4415	1.23078	normal	--	--	Molecular Function: voltage-gated potassium channel activity (GO:0005249);; Cellular Component: plasma membrane (GO:0005886);; Biological Process: circadian rhythm (GO:0007623);; Biological Process: response to high light intensity (GO:0009644);; Biological Process: stomatal movement (GO:0010118);; Cellular Component: integral component of membrane (GO:0016021);; Biological Process: regulation of…	--	--	[PT]	Inorganic ion transport and metabolism;; Signal transduction mechanisms	Domain of unknown function (DUF3354);; Ion transport protein;; Cyclic nucleotide-binding domain;; Ion channel	Potassium channel KAT1 OS=Oryza sativa subsp. japonica (Rice) PE=2 SV=1	P	Inorganic ion transport and metabolism	PREDICTED: potassium channel KAT1-like [Setaria italica]
Seita.1G020200	Seita.1G020200	0.475322	20	5.89822	289	4.46719	182	1.17428	41	1.21775	54	0.904835	35	0.527868	1.97285	normal	--	--	--	--	--	--	--	--	--	--	--	--
Seita.1G020300	Seita.1G020300	1.94715	79	1.0552	45	1.0479	41	2.34547	84	2.20425	91	1.41364	56	0.948896	-0.507484	normal	--	--	--	--	--	--	--	Human Cytomegalovirus UL139 protein	--	S	Function unknown	PREDICTED: uncharacterized protein LOC101785269 [Setaria italica]
Seita.1G020400	Seita.1G020400	7.37309	527	3.56114	338	4.28017	373	6.85848	504	6.68338	603	4.31592	335	0.993235	-0.221099	normal	--	--	Molecular Function: zinc ion binding (GO:0008270);; Molecular Function: ligase activity (GO:0016874);;	--	--	[R]	General function prediction only	--	--	R	General function prediction only	PREDICTED: uncharacterized protein LOC101785672 isoform X1 [Setaria italica]
Seita.1G020500	Seita.1G020500	5.81911	841	7.17102	1338	7.59291	1224	7.20352	1034	7.68721	1324	8.43773	1246	1	-0.0621289	normal	--	--	Molecular Function: ubiquitin thiolesterase activity (GO:0004221);; Molecular Function: ubiquitin-specific protease activity (GO:0004843);; Cellular Component: nucleus (GO:0005634);; Biological Process: ubiquitin-dependent protein catabolic process (GO:0006511);; Molecular Function: zinc ion binding (GO:0008270);; Biological Process: cell proliferation (GO:0008283);; Biological Process: flower de…	K11855|0|sita:101786362|ubiquitin carboxyl-terminal hydrolase 15-like; K11855 ubiquitin carboxyl-terminal hydrolase 36/42 [EC:3.4.19.12] (A)	--	[O]	Posttranslational modification, protein turnover, chaperones	Ubiquitin carboxyl-terminal hydrolase;; Ubiquitin carboxyl-terminal hydrolase;; MYND finger	Ubiquitin carboxyl-terminal hydrolase 15 GN=UBP15 OS=Arabidopsis thaliana (Mouse-ear cress) PE=2 SV=2	O	Posttranslational modification, protein turnover, chaperones	PREDICTED: ubiquitin carboxyl-terminal hydrolase 15-like isoform X1 [Setaria italica]
Seita.1G020600	Seita.1G020600	11.5929	686	17.0959	1333	21.3893	1425	26.2695	1560	37.8701	2689	33.1081	2041	0.37091	-0.82165	normal	[R]	General function prediction only	Molecular Function: nucleotide binding (GO:0000166);; Molecular Function: nucleic acid binding (GO:0003676);;	--	--	[R]	General function prediction only	RNA recognition motif (a.k.a. RRM, RBD, or RNP domain);; RNA recognition motif. (a.k.a. RRM, RBD, or RNP domain);; RNA recognition motif. (a.k.a. RRM, RBD, or RNP domain);; Ataxin-2 C-terminal region	Polyadenylate-binding protein-interacting protein 11 GN=CID11 OS=Arabidopsis thaliana (Mouse-ear cress) PE=2 SV=1	R	General function prediction only	PREDICTED: nucleolin 2-like [Setaria italica]
Seita.1G020700	Seita.1G020700	450.837	40201	190.243	23711	216.2	22904	195.969	18647	43.7638	6718	167.583	17324	0.566959	0.963513	normal	[C]	Energy production and conversion	Cellular Component: cytoplasm (GO:0005737);; Biological Process: tricarboxylic acid cycle (GO:0006099);; Molecular Function: phosphoenolpyruvate carboxylase activity (GO:0008964);; Biological Process: carbon fixation (GO:0015977);; Biological Process: photosynthesis (GO:0015979);;	K01595|0|sita:101752877|PPC1; phosphoenolpyruvate carboxylase 1 (EC:4.1.1.31); K01595 phosphoenolpyruvate carboxylase [EC:4.1.1.31] (A)	Pyruvate metabolism (ko00620);; Carbon fixation in photosynthetic organisms (ko00710);; Carbon metabolism (ko01200)	--	--	Phosphoenolpyruvate carboxylase	Phosphoenolpyruvate carboxylase 1 GN=PEPC OS=Sorghum bicolor (Sorghum) PE=2 SV=1	C	Energy production and conversion	phosphoenolpyruvate carboxylase 1 [Setaria italica]
Seita.1G020800	Seita.1G020800	6.40335	231	3.2345	154	3.27077	133	0	0	0	0	0	0	5.54163e-14	Inf	up	--	--	--	--	--	--	--	--	--	--	--	--
Seita.1G020900	Seita.1G020900	19.9533	1422	9.33558	877	8.1248	653	12.0021	859	9.55574	818	12.8535	955	0.996092	0.121739	normal	[R]	General function prediction only	Molecular Function: peroxisome matrix targeting signal-2 binding (GO:0005053);; Biological Process: fatty acid beta-oxidation (GO:0006635);; Biological Process: protein import into peroxisome matrix (GO:0016558);; Cellular Component: Cul4-RING E3 ubiquitin ligase complex (GO:0080008);;	K13341|0|sita:101753285|peroxisome biogenesis protein 7-like; K13341 peroxin-7 (A)	Peroxisome (ko04146)	[U]	Intracellular trafficking, secretion, and vesicular transport	WD domain, G-beta repeat	Peroxisome biogenesis protein 7 GN=PEX7 OS=Arabidopsis thaliana (Mouse-ear cress) PE=1 SV=2	U	Intracellular trafficking, secretion, and vesicular transport	PREDICTED: peroxisome biogenesis protein 7-like [Setaria italica]
Seita.1G021000	Seita.1G021000	0	0	0	0	0	0	0.065478	4	0	0	0.015881	1	--	--	--	--	--	Biological Process: xenobiotic metabolic process (GO:0006805);; Molecular Function: UDP-glucosyltransferase activity (GO:0035251);;	--	--	[GC]	Carbohydrate transport and metabolism;; Energy production and conversion	UDP-glucoronosyl and UDP-glucosyl transferase	Hydroquinone glucosyltransferase GN=AS OS=Rauvolfia serpentina (Serpentine wood) PE=1 SV=1	2101		hypothetical protein SORBIDRAFT_04g008700 [Sorghum bicolor]
Seita.1G021100	Seita.1G021100	0	0	0	0	0	0	0	0	0	0	0	0	--	--	--	--	--	Biological Process: xenobiotic metabolic process (GO:0006805);; Molecular Function: UDP-glucosyltransferase activity (GO:0035251);;	--	--	[GC]	Carbohydrate transport and metabolism;; Energy production and conversion	UDP-glucoronosyl and UDP-glucosyl transferase	Hydroquinone glucosyltransferase GN=AS OS=Rauvolfia serpentina (Serpentine wood) PE=1 SV=1	2411		hypothetical protein SORBIDRAFT_04g008700 [Sorghum bicolor]
Seita.1G021200	Seita.1G021200	0.311495	6	0.772774	20	1.57303	34	1.67636	33	1.93827	45	2.36106	47	--	--	--	--	--	--	--	--	--	--	--	--	--	--	--
Seita.1G021300	Seita.1G021300	1.3876	101	0.454317	44	0.423503	35	0.460721	34	0.321303	29	0.395882	31	--	--	--	--	--	Biological Process: xenobiotic metabolic process (GO:0006805);; Molecular Function: UDP-glucosyltransferase activity (GO:0035251);;	K08237|0|sita:101754106|hydroquinone glucosyltransferase-like; K08237 hydroquinone glucosyltransferase [EC:2.4.1.218] (A)	--	[GC]	Carbohydrate transport and metabolism;; Energy production and conversion	UDP-glucoronosyl and UDP-glucosyl transferase	Hydroquinone glucosyltransferase GN=AS OS=Rauvolfia serpentina (Serpentine wood) PE=1 SV=1	2186		PREDICTED: hydroquinone glucosyltransferase-like [Setaria italica]
Seita.1G021400	Seita.1G021400	10.4007	1177	9.26271	1370	8.75378	1113	11.8398	1315	12.2899	1644	11.9675	1406	0.978771	-0.250802	normal	[RTKL]	General function prediction only;; Signal transduction mechanisms;; Transcription;; Replication, recombination and repair	Molecular Function: protein serine/threonine kinase activity (GO:0004674);; Molecular Function: ATP binding (GO:0005524);; Biological Process: protein phosphorylation (GO:0006468);;	--	--	[T]	Signal transduction mechanisms	Protein tyrosine kinase;; Protein kinase domain;; Ethylene-responsive protein kinase Le-CTR1	Serine/threonine-protein kinase EDR1 GN=F22O13.20 OS=Arabidopsis thaliana (Mouse-ear cress) PE=1 SV=1	T	Signal transduction mechanisms	PREDICTED: serine/threonine-protein kinase EDR1-like isoform X1 [Setaria italica]
Seita.1G021500	Seita.1G021500	0.93135	85	2.24787	270	2.19583	226	2.46186	225	2.74212	300	2.76429	263	0.95164	-0.399439	normal	--	--	Molecular Function: binding (GO:0005488);;	--	--	--	--	Myb-like DNA-binding domain	Putative Myb family transcription factor At1g14600 GN=At1g14600 OS=Arabidopsis thaliana (Mouse-ear cress) PE=2 SV=2	R	General function prediction only	PREDICTED: uncharacterized protein LOC101755438 [Setaria italica]
Seita.1G021600	Seita.1G021600	0.39562	22	0.306865	22	0.327017	20	2.51339	136	2.12196	137	3.90814	219	0.00125395	-2.95882	down	--	--	--	--	--	--	--	F-box domain	--	R	General function prediction only	PREDICTED: uncharacterized protein LOC101766412 [Setaria italica]
Seita.1G021700	Seita.1G021700	0	0	0	0	0	0	0.06575	1	0.066293	1	0.177878	2	--	--	--	--	--	--	--	--	--	--	--	--	--	--	PREDICTED: uncharacterized protein LOC101786273 [Setaria italica]
Seita.1G021800	Seita.1G021800	0	0	0	0	0	0	0	0	0	0	0	0	--	--	--	--	--	--	--	--	--	--	--	--	R	General function prediction only	PREDICTED: uncharacterized protein LOC101777813 [Setaria italica]
Seita.1G021900	Seita.1G021900	16.5539	1637	12.9365	1686	13.1942	1470	17.9045	1777	18.586	2207	26.585	2739	0.84866	-0.496146	normal	--	--	Molecular Function: protein serine/threonine kinase activity (GO:0004674);; Molecular Function: ATP binding (GO:0005524);; Biological Process: protein phosphorylation (GO:0006468);; Biological Process: transmembrane receptor protein tyrosine kinase signaling pathway (GO:0007169);; Biological Process: systemic acquired resistance (GO:0009627);; Biological Process: embryo development ending in seed…	--	--	--	--	Protein tyrosine kinase;; Protein kinase domain;; Leucine rich repeat;; Leucine Rich repeats (2 copies);; Leucine Rich Repeat	Probable LRR receptor-like serine/threonine-protein kinase At2g24230 (Precursor) GN=At2g24230 OS=Arabidopsis thaliana (Mouse-ear cress) PE=2 SV=1	T	Signal transduction mechanisms	PREDICTED: probable LRR receptor-like serine/threonine-protein kinase At2g24230-like [Setaria italica]
Seita.1G022000	Seita.1G022000	0	0	0	0	0	0	0	0	0	0	0	0	--	--	--	--	--	Molecular Function: DNA binding (GO:0003677);; Biological Process: regulation of transcription, DNA-templated (GO:0006355);;	--	--	--	--	Dof domain, zinc finger	Dof zinc finger protein PBF GN=PBF OS=Zea mays (Maize) PE=1 SV=1	K	Transcription	PREDICTED: dof zinc finger protein PBF-like [Setaria italica]
Seita.1G022100	Seita.1G022100	0	0	0	0	0	0	0.064464	4	0	0	0	0	--	--	--	--	--	Cellular Component: cytosol (GO:0005829);; Cellular Component: chloroplast stroma (GO:0009570);;	--	--	--	--	--	--	S	Function unknown	PREDICTED: uncharacterized protein LOC101767640 [Setaria italica]
Seita.1G022200	Seita.1G022200	0	0	0	0	0	0	0	0	0	0	0	0	--	--	--	--	--	Molecular Function: peroxidase activity (GO:0004601);; Biological Process: response to oxidative stress (GO:0006979);; Cellular Component: cytoplasmic membrane-bounded vesicle (GO:0016023);; Molecular Function: heme binding (GO:0020037);; Molecular Function: metal ion binding (GO:0046872);; Biological Process: oxidation-reduction process (GO:0055114);;	K00430|0|sita:101756254|peroxidase 70-like; K00430 peroxidase [EC:1.11.1.7] (A)	Phenylalanine metabolism (ko00360);; Phenylpropanoid biosynthesis (ko00940)	--	--	Peroxidase	Peroxidase 70 (Precursor) GN=PER70 OS=Zea mays (Maize) PE=1 SV=1	R	General function prediction only	PREDICTED: peroxidase 70-like [Setaria italica]
Seita.1G022300	Seita.1G022300	0	0	0	0	0	0	0	0	0	0	0	0	--	--	--	--	--	Molecular Function: peroxidase activity (GO:0004601);; Biological Process: response to oxidative stress (GO:0006979);; Cellular Component: cytoplasmic membrane-bounded vesicle (GO:0016023);; Molecular Function: heme binding (GO:0020037);; Molecular Function: metal ion binding (GO:0046872);; Biological Process: oxidation-reduction process (GO:0055114);;	K00430|0|sita:101756652|peroxidase 4-like; K00430 peroxidase [EC:1.11.1.7] (A)	Phenylalanine metabolism (ko00360);; Phenylpropanoid biosynthesis (ko00940)	--	--	Peroxidase	Peroxidase 4 {ECO:0000250|UniProtKB:Q42578} (Precursor) OS=Vitis vinifera (Grape) PE=1 SV=1	R	General function prediction only	PREDICTED: peroxidase 4-like [Setaria italica]
Seita.1G022400	Seita.1G022400	0	0	0	0	0	0	0	0	0	0	0	0	--	--	--	[P]	Inorganic ion transport and metabolism	--	K00430|0|sita:101768840|cationic peroxidase 1-like; K00430 peroxidase [EC:1.11.1.7] (A)	Phenylalanine metabolism (ko00360);; Phenylpropanoid biosynthesis (ko00940)	--	--	Peroxidase	Cationic peroxidase 1 (Precursor) GN=PNC1 OS=Arachis hypogaea (Peanut) PE=1 SV=2	R	General function prediction only	PREDICTED: cationic peroxidase 1-like [Setaria italica]
Seita.1G022500	Seita.1G022500	0.098106	6	0.073129	6	0.551057	38	0.09776	6	0.027239	2	3.51402	224	--	--	--	--	--	Molecular Function: peroxidase activity (GO:0004601);; Biological Process: response to oxidative stress (GO:0006979);; Cellular Component: cytoplasmic membrane-bounded vesicle (GO:0016023);; Molecular Function: heme binding (GO:0020037);; Molecular Function: metal ion binding (GO:0046872);; Biological Process: oxidation-reduction process (GO:0055114);;	K00430|0|sita:101757067|peroxidase 70-like; K00430 peroxidase [EC:1.11.1.7] (A)	Phenylalanine metabolism (ko00360);; Phenylpropanoid biosynthesis (ko00940)	--	--	Peroxidase	Peroxidase 70 (Precursor) GN=PER70 OS=Zea mays (Maize) PE=1 SV=1	R	General function prediction only	PREDICTED: peroxidase 70-like [Setaria italica]
Seita.1G022600	Seita.1G022600	0.060976	1	0	0	0	0	0	0	0	0	0	0	--	--	--	--	--	--	--	--	--	--	--	--	--	--	--
Seita.1G022700	Seita.1G022700	4.23303	140	0.931443	41	0.65377	25	0.220819	8	1.04233	42	0.266268	10	--	--	--	--	--	--	--	--	--	--	--	--	--	--	--
Seita.1G022800	Seita.1G022800	0.036767	2	0.017796	2	0.017498	2	0.098984	6	0.084577	6	0	0	--	--	--	[E]	Amino acid transport and metabolism	Biological Process: polysaccharide biosynthetic process (GO:0000271);; Cellular Component: cytoplasm (GO:0005737);; Biological Process: pattern specification process (GO:0007389);; Biological Process: regulation of cell size (GO:0008361);; Biological Process: multidimensional cell growth (GO:0009825);; Biological Process: auxin polar transport (GO:0009926);; Biological Process: cell tip growth (G…	--	--	[E]	Amino acid transport and metabolism	Spermine/spermidine synthase	Thermospermine synthase ACAULIS5 GN=T20D1.50 OS=Arabidopsis thaliana (Mouse-ear cress) PE=1 SV=1	E	Amino acid transport and metabolism	PREDICTED: thermospermine synthase ACAULIS5-like [Setaria italica]
Seita.1G022900	Seita.1G022900	0	0	0	0	0	0	0	0	0	0	0	0	--	--	--	--	--	Molecular Function: peroxidase activity (GO:0004601);; Biological Process: response to oxidative stress (GO:0006979);; Cellular Component: cytoplasmic membrane-bounded vesicle (GO:0016023);; Molecular Function: heme binding (GO:0020037);; Molecular Function: metal ion binding (GO:0046872);; Biological Process: oxidation-reduction process (GO:0055114);;	K00430|1.23515e-168|sita:101757857|peroxidase 52-like; K00430 peroxidase [EC:1.11.1.7] (A)	Phenylalanine metabolism (ko00360);; Phenylpropanoid biosynthesis (ko00940)	--	--	Peroxidase	Peroxidase 52 (Precursor) GN=K18I23.14 OS=Arabidopsis thaliana (Mouse-ear cress) PE=2 SV=1	R	General function prediction only	PREDICTED: peroxidase 52-like [Setaria italica]
Seita.1G023000	Seita.1G023000	0.403316	25	0.036833	4	0.292569	21	0.705549	44	1.25781	94	0.886799	58	0.0258968	-1.9473	normal	--	--	Molecular Function: peroxidase activity (GO:0004601);; Cellular Component: mitochondrion (GO:0005739);; Biological Process: response to oxidative stress (GO:0006979);; Molecular Function: heme binding (GO:0020037);; Molecular Function: metal ion binding (GO:0046872);; Biological Process: oxidation-reduction process (GO:0055114);;	K00430|0|sita:101758277|peroxidase 52-like; K00430 peroxidase [EC:1.11.1.7] (A)	Phenylalanine metabolism (ko00360);; Phenylpropanoid biosynthesis (ko00940)	--	--	Peroxidase	Peroxidase 52 (Precursor) GN=K18I23.14 OS=Arabidopsis thaliana (Mouse-ear cress) PE=2 SV=1	R	General function prediction only	PREDICTED: peroxidase 52-like [Setaria italica]
Seita.1G023100	Seita.1G023100	0.204536	15	0.219802	22	0.102372	9	0.192279	14	0.05837	6	0.270323	21	--	--	--	--	--	Molecular Function: peroxidase activity (GO:0004601);; Biological Process: response to oxidative stress (GO:0006979);; Molecular Function: heme binding (GO:0020037);; Molecular Function: metal ion binding (GO:0046872);; Biological Process: oxidation-reduction process (GO:0055114);;	K00430|0|sita:101758680|peroxidase 52-like; K00430 peroxidase [EC:1.11.1.7] (A)	Phenylalanine metabolism (ko00360);; Phenylpropanoid biosynthesis (ko00940)	--	--	Peroxidase	Peroxidase 52 (Precursor) GN=K18I23.14 OS=Arabidopsis thaliana (Mouse-ear cress) PE=2 SV=1	R	General function prediction only	PREDICTED: peroxidase 52-like [Setaria italica]
Seita.1G023200	Seita.1G023200	0	0	0	0	0	0	0	0	0	0	0	0	--	--	--	--	--	Cellular Component: membrane (GO:0016020);; Cellular Component: cytoplasmic membrane-bounded vesicle (GO:0016023);;	--	--	--	--	--	--	R	General function prediction only	hypothetical protein F775_03161 [Aegilops tauschii]
Seita.1G023300	Seita.1G023300	27.7532	2455	35.7637	4168	38.382	3824	36.1419	3208	38.3905	4076	41.085	3786	1	-0.060119	normal	[RTKL]	General function prediction only;; Signal transduction mechanisms;; Transcription;; Replication, recombination and repair	Molecular Function: protein serine/threonine kinase activity (GO:0004674);; Molecular Function: ATP binding (GO:0005524);; Cellular Component: cytosol (GO:0005829);; Cellular Component: plasma membrane (GO:0005886);; Biological Process: protein phosphorylation (GO:0006468);; Biological Process: detection of brassinosteroid stimulus (GO:0009729);; Biological Process: response to auxin (GO:0009733)…	K14502|0|sita:101759495|shaggy-related protein kinase eta-like; K14502 protein brassinosteroid insensitive 2 [EC:2.7.11.1] (A)	Plant hormone signal transduction (ko04075)	[G]	Carbohydrate transport and metabolism	Protein kinase domain;; Protein tyrosine kinase	Shaggy-related protein kinase eta GN=F28A21.120 OS=Arabidopsis thaliana (Mouse-ear cress) PE=1 SV=2	T	Signal transduction mechanisms	PREDICTED: shaggy-related protein kinase eta-like [Setaria italica]
Seita.1G023400	Seita.1G023400	4.10205	677	3.03825	660	3.17769	590	4.30197	712	3.61852	717	3.36148	578	1	-0.0615342	normal	[RTKL]	General function prediction only;; Signal transduction mechanisms;; Transcription;; Replication, recombination and repair	Molecular Function: protein serine/threonine kinase activity (GO:0004674);; Molecular Function: ATP binding (GO:0005524);; Biological Process: protein phosphorylation (GO:0006468);; Biological Process: transmembrane receptor protein tyrosine kinase signaling pathway (GO:0007169);; Biological Process: embryo sac egg cell differentiation (GO:0009560);; Cellular Component: integral component of memb…	--	--	--	--	Protein kinase domain;; Protein tyrosine kinase;; Leucine Rich repeats (2 copies);; Leucine rich repeat;; Leucine Rich Repeat;; Leucine rich repeat N-terminal domain;; Leucine Rich repeat	Probable LRR receptor-like serine/threonine-protein kinase At5g45780 (Precursor) GN=At5g45780 OS=Arabidopsis thaliana (Mouse-ear cress) PE=2 SV=1	T	Signal transduction mechanisms	PREDICTED: probable LRR receptor-like serine/threonine-protein kinase At5g45780-like [Setaria italica]
Seita.1G023500	Seita.1G023500	13.0968	1025	12.9609	1361	13.8735	1237	13.251	1042	16.1565	1541	18.4305	1507	0.993602	-0.160399	normal	[E]	Amino acid transport and metabolism	Molecular Function: L-aspartate:2-oxoglutarate aminotransferase activity (GO:0004069);; Molecular Function: copper ion binding (GO:0005507);; Cellular Component: mitochondrion (GO:0005739);; Biological Process: cellular amino acid metabolic process (GO:0006520);; Biological Process: pyrimidine ribonucleotide biosynthetic process (GO:0009220);; Molecular Function: pyridoxal phosphate binding (GO:0…	K14455|0|sita:101760319|aspartate aminotransferase, mitochondrial-like; K14455 aspartate aminotransferase, mitochondrial [EC:2.6.1.1] (A)	Alanine, aspartate and glutamate metabolism (ko00250);; Cysteine and methionine metabolism (ko00270);; Arginine and proline metabolism (ko00330);; Tyrosine metabolism (ko00350);; Phenylalanine metabolism (ko00360);; Phenylalanine, tyrosine and tryptophan biosynthesis (ko00400);; Carbon fixation in photosynthetic organisms (ko00710);; Isoquinoline alkaloid biosynthesis (ko00950);; Tropane, piperid…	[E]	Amino acid transport and metabolism	Aminotransferase class I and II	Aspartate aminotransferase, mitochondrial (Precursor) GN=ASP1 OS=Arabidopsis thaliana (Mouse-ear cress) PE=1 SV=1	E	Amino acid transport and metabolism	PREDICTED: aspartate aminotransferase, mitochondrial-like [Setaria italica]
Seita.1G023600	Seita.1G023600	6.72581	477	4.04139	378	4.07344	326	3.70799	264	2.55693	218	3.71424	275	0.836527	0.613748	normal	[C]	Energy production and conversion	Cellular Component: cell wall (GO:0005618);; Cellular Component: plasma membrane (GO:0005886);; Molecular Function: UDP-N-acetylmuramate dehydrogenase activity (GO:0008762);; Biological Process: embryo development ending in seed dormancy (GO:0009793);; Biological Process: polar nucleus fusion (GO:0010197);; Cellular Component: apoplast (GO:0048046);; Molecular Function: flavin adenine dinucleotid…	--	--	--	--	FAD binding domain;; Berberine and berberine like	Cannabidiolic acid synthase-like 2 (Precursor) GN=CBDAS3 OS=Cannabis sativa (Hemp) PE=2 SV=1	R	General function prediction only	PREDICTED: cannabidiolic acid synthase-like [Setaria italica]
Seita.1G023700	Seita.1G023700	0	0	0.063331	2	0	0	0	0	0	0	0	0	--	--	--	--	--	Cellular Component: intracellular membrane-bounded organelle (GO:0043231);; Cellular Component: cytoplasmic part (GO:0044444);;	--	--	--	--	Protein of unknown function (DUF3615)	--	S	Function unknown	PREDICTED: uncharacterized protein LOC101770463 [Setaria italica]
Seita.1G023800	Seita.1G023800	71.8927	3384	41.1943	2556	48.1177	2551	54.1915	2560	42.4139	2397	42.8581	2102	0.979484	0.253735	normal	[J]	Translation, ribosomal structure and biogenesis	Molecular Function: structural constituent of ribosome (GO:0003735);; Cellular Component: nucleolus (GO:0005730);; Cellular Component: vacuole (GO:0005773);; Cellular Component: plasma membrane (GO:0005886);; Biological Process: translation (GO:0006412);; Cellular Component: chloroplast envelope (GO:0009941);; Cellular Component: cytosolic large ribosomal subunit (GO:0022625);; Biological Process…	K02866|2.18907e-165|sita:101761124|60S ribosomal protein L10-1-like; K02866 large subunit ribosomal protein L10e (A)	Ribosome (ko03010)	[J]	Translation, ribosomal structure and biogenesis	Ribosomal protein L16p/L10e	60S ribosomal protein L10-1 GN=OsJ_032053 OS=Oryza sativa subsp. japonica (Rice) PE=2 SV=1	J	Translation, ribosomal structure and biogenesis	PREDICTED: 60S ribosomal protein L10-1-like [Setaria italica]
Seita.1G023900	Seita.1G023900	14.8877	790	13.8983	972	14.6787	878	17.9721	957	15.2772	974	18.9486	1048	0.993602	-0.172055	normal	--	--	Molecular Function: structural molecule activity (GO:0005198);; Cellular Component: Arp2/3 protein complex (GO:0005885);; Biological Process: toxin catabolic process (GO:0009407);; Biological Process: Arp2/3 complex-mediated actin nucleation (GO:0034314);;	K05756|8.10671e-109|sita:101761510|actin-related protein 2/3 complex subunit 3-like; K05756 actin related protein 2/3 complex, subunit 3 (A)	--	[Z]	Cytoskeleton	ARP2/3 complex ARPC3 (21 kDa) subunit	Actin-related protein 2/3 complex subunit 3 GN=ARPC3 OS=Arabidopsis thaliana (Mouse-ear cress) PE=1 SV=1	Z	Cytoskeleton	PREDICTED: actin-related protein 2/3 complex subunit 3-like [Setaria italica]
Seita.1G024000	Seita.1G024000	0.900155	41	0.991819	60	0.69352	36	0.468405	22	0.620155	34	0.353847	17	--	--	--	--	--	Cellular Component: plastid (GO:0009536);;	--	--	--	--	--	--	S	Function unknown	PREDICTED: uncharacterized protein LOC101761910 [Setaria italica]
Seita.1G024100	Seita.1G024100	27.2758	2646	110.477	14050	110.353	12013	75.6513	7309	72.0116	8327	92.2047	9291	0.997287	0.246924	normal	[MG]	Cell wall/membrane/envelope biogenesis;; Carbohydrate transport and metabolism	Molecular Function: nucleotide binding (GO:0000166);; Cellular Component: vacuole (GO:0005773);; Cellular Component: chloroplast stroma (GO:0009570);; Biological Process: stomatal complex morphogenesis (GO:0010103);; Biological Process: mRNA modification (GO:0016556);;	--	--	[G]	Carbohydrate transport and metabolism	Complex I intermediate-associated protein 30 (CIA30);; NADH(P)-binding;; NmrA-like family;; NAD dependent epimerase/dehydratase family;; short chain dehydrogenase;; Male sterility protein	Probable complex I intermediate-associated protein 30 GN=At1g17350 OS=Arabidopsis thaliana (Mouse-ear cress) PE=1 SV=2	G	Carbohydrate transport and metabolism	PREDICTED: uncharacterized protein LOC101762330 isoform X3 [Setaria italica]
Seita.1G024200	Seita.1G024200	0.195951	19	0.332167	42	0.240297	26	0.221601	22	0.216178	25	0.190556	20	--	--	--	[RTKL]	General function prediction only;; Signal transduction mechanisms;; Transcription;; Replication, recombination and repair	Molecular Function: protein serine/threonine kinase activity (GO:0004674);; Molecular Function: ATP binding (GO:0005524);; Biological Process: protein phosphorylation (GO:0006468);; Cellular Component: membrane (GO:0016020);; Cellular Component: cytoplasmic membrane-bounded vesicle (GO:0016023);;	--	--	--	--	Protein kinase domain;; Protein tyrosine kinase;; D-mannose binding lectin;; PAN-like domain	G-type lectin S-receptor-like serine/threonine-protein kinase SD2-5 (Precursor) GN=SD25 OS=Arabidopsis thaliana (Mouse-ear cress) PE=1 SV=1	T	Signal transduction mechanisms	PREDICTED: G-type lectin S-receptor-like serine/threonine-protein kinase SD2-5-like [Setaria italica]
Seita.1G024300	Seita.1G024300	4.27847	358	51.0245	5625	46.0187	4336	31.9174	2680	26.6723	2679	35.5718	3100	0.994392	0.333651	normal	--	--	Cellular Component: ubiquitin ligase complex (GO:0000151);; Molecular Function: ubiquitin-protein transferase activity (GO:0004842);; Cellular Component: plastid (GO:0009536);; Biological Process: plant-type hypersensitive response (GO:0009626);; Biological Process: defense response to fungus, incompatible interaction (GO:0009817);; Biological Process: protein ubiquitination (GO:0016567);;	--	--	[S]	Function unknown	U-box domain;; Armadillo/beta-catenin-like repeat;; Armadillo-like	U-box domain-containing protein 4 OS=Oryza sativa subsp. japonica (Rice) PE=2 SV=1	S	Function unknown	PREDICTED: U-box domain-containing protein 4-like [Setaria italica]
Seita.1G024400	Seita.1G024400	1.37417	116	0.488064	54	0.518083	49	0.598782	51	0.652931	66	0.545839	48	0.972173	0.376056	normal	--	--	Biological Process: RNA splicing, via endonucleolytic cleavage and ligation (GO:0000394);; Biological Process: methionine biosynthetic process (GO:0009086);; Biological Process: virus induced gene silencing (GO:0009616);; Biological Process: vegetative phase change (GO:0010050);;	--	--	--	--	NHL repeat	--	R	General function prediction only	PREDICTED: uncharacterized protein LOC101764086 [Setaria italica]
Seita.1G024500	Seita.1G024500	0	0	0	0	0	0	0	0	0	0	0	0	--	--	--	--	--	Molecular Function: DNA binding (GO:0003677);; Molecular Function: sequence-specific DNA binding transcription factor activity (GO:0003700);; Molecular Function: protein binding (GO:0005515);; Cellular Component: nucleus (GO:0005634);; Cellular Component: cytosol (GO:0005829);; Biological Process: regulation of transcription, DNA-templated (GO:0006355);; Biological Process: brassinosteroid mediat…	K14503|5.4621e-20|cic:CICLE_v10001978mg|hypothetical protein; K14503 brassinosteroid resistant 1/2 (A)	Plant hormone signal transduction (ko04075)	--	--	Plant protein of unknown function (DUF822)	Protein BRASSINAZOLE-RESISTANT 2 GN=F18O14_4 OS=Arabidopsis thaliana (Mouse-ear cress) PE=1 SV=1	S	Function unknown	hypothetical protein AALP_AA2G192600 [Arabis alpina]
Seita.1G024600	Seita.1G024600	7.96769	625	7.20017	744	7.31636	646	10.065	792	8.00732	754	8.78753	718	0.994584	-0.167987	normal	[S]	Function unknown	Molecular Function: metal ion binding (GO:0046872);;	--	--	[S]	Function unknown	Family of unknown function (DUF500);; FYVE zinc finger	1-phosphatidylinositol-3-phosphate 5-kinase FAB1B GN=FAB1B OS=Arabidopsis thaliana (Mouse-ear cress) PE=2 SV=1	R	General function prediction only	PREDICTED: uncharacterized protein LOC101764494 [Setaria italica]
Seita.1G024700	Seita.1G024700	48.6041	3055	31.2843	2582	31.5717	2185	44.0535	2678	42.3926	3129	32.6252	2243	1	-0.0483682	normal	--	--	Molecular Function: RNA binding (GO:0003723);; Cellular Component: nucleus (GO:0005634);; Cellular Component: cytoplasm (GO:0005737);; Biological Process: mRNA processing (GO:0006397);; Biological Process: glucuronoxylan metabolic process (GO:0010413);; Biological Process: xylan biosynthetic process (GO:0045492);;	K12839|0|sita:101764907|survival of motor neuron-related-splicing factor 30-like; K12839 survival of motor neuron-related-splicing factor 30 (A)	Spliceosome (ko03040)	[A]	RNA processing and modification	Survival motor neuron protein (SMN)	--	A	RNA processing and modification	PREDICTED: survival of motor neuron-related-splicing factor 30-like isoform X1 [Setaria italica]
Seita.1G024800	Seita.1G024800	0	0	0	0	0	0	0	0	0	0	0	0	--	--	--	--	--	--	--	--	--	--	--	--	--	--	--
Seita.1G024900	Seita.1G024900	0	0	0	0	0	0	0	0	0	0	0	0	--	--	--	--	--	--	--	--	--	--	GRF zinc finger	--	--	--	PREDICTED: uncharacterized protein LOC101785524 [Setaria italica]
Seita.1G025000	Seita.1G025000	0	0	0	0	0	0	0	0	0	0	0	0	--	--	--	--	--	--	--	--	--	--	--	--	--	--	--
Seita.1G025100	Seita.1G025100	5.74903	303	1.22973	86	3.18269	189	5.15814	273	6.86728	434	17.2186	944	0.51901	-1.55292	normal	[G]	Carbohydrate transport and metabolism	Molecular Function: transporter activity (GO:0005215);; Biological Process: transport (GO:0006810);; Cellular Component: integral component of membrane (GO:0016021);;	K09874|0|sita:101766951|aquaporin NIP1-1-like; K09874 aquaporin NIP (A)	--	[G]	Carbohydrate transport and metabolism	Major intrinsic protein	Aquaporin NIP1-1 GN=NIP1-1 OS=Zea mays (Maize) PE=2 SV=1	G	Carbohydrate transport and metabolism	PREDICTED: aquaporin NIP1-1-like [Setaria italica]
Seita.1G025200	Seita.1G025200	2.49381	156	0.365251	30	0.707811	50	0.208046	14	0.259479	20	0.289148	19	--	--	--	--	--	--	--	--	--	--	--	BURP domain-containing protein 14 (Precursor) OS=Oryza sativa subsp. japonica (Rice) PE=2 SV=2	R	General function prediction only	PREDICTED: BURP domain-containing protein 14-like [Setaria italica]
Seita.1G025300	Seita.1G025300	0.706131	27	0.191749	10	0.025158	2	0.128127	5	0.106732	5	0.192392	8	--	--	--	--	--	Cellular Component: mitochondrion (GO:0005739);; Cellular Component: membrane (GO:0016020);;	--	--	--	--	--	--	S	Function unknown	PREDICTED: uncharacterized protein LOC101759482 [Setaria italica]
Seita.1G025400	Seita.1G025400	2.01695	343	1.86838	418	1.75718	337	2.3398	399	1.83786	375	1.38871	246	1	0.110476	normal	[RTKL]	General function prediction only;; Signal transduction mechanisms;; Transcription;; Replication, recombination and repair	Molecular Function: protein serine/threonine kinase activity (GO:0004674);; Molecular Function: ATP binding (GO:0005524);; Biological Process: carbohydrate metabolic process (GO:0005975);; Biological Process: protein phosphorylation (GO:0006468);; Cellular Component: cytoplasmic membrane-bounded vesicle (GO:0016023);;	--	--	--	--	Di-glucose binding within endoplasmic reticulum;; Protein tyrosine kinase;; Protein kinase domain;; Leucine Rich repeats (2 copies);; Leucine rich repeat;; Leucine Rich Repeat;; Leucine Rich repeat;; Leucine rich repeat;; Carbohydrate-binding protein of the ER	Probable LRR receptor-like serine/threonine-protein kinase At1g53440 (Precursor) GN=At1g53440 OS=Arabidopsis thaliana (Mouse-ear cress) PE=2 SV=2	T	Signal transduction mechanisms	PREDICTED: probable LRR receptor-like serine/threonine-protein kinase At1g53440-like isoform X1 [Setaria italica]
Seita.1G025500	Seita.1G025500	2.38741	64	2.0925	73	1.08622	33	2.69233	72	2.02076	65	2.39154	66	0.993602	-0.290462	normal	--	--	--	--	--	--	--	gag-polypeptide of LTR copia-type	--	--	--	PREDICTED: uncharacterized protein LOC101767350 isoform X2 [Setaria italica]
Seita.1G025600	Seita.1G025600	15.9251	2210	4.92692	901	4.46615	699	10.6179	1479	8.83015	1472	9.90268	1432	0.992936	-0.260411	normal	[RTKL]	General function prediction only;; Signal transduction mechanisms;; Transcription;; Replication, recombination and repair	Molecular Function: protein serine/threonine kinase activity (GO:0004674);; Molecular Function: ATP binding (GO:0005524);; Biological Process: carbohydrate metabolic process (GO:0005975);; Biological Process: protein phosphorylation (GO:0006468);; Cellular Component: cytoplasmic membrane-bounded vesicle (GO:0016023);;	--	--	--	--	Di-glucose binding within endoplasmic reticulum;; Protein tyrosine kinase;; Protein kinase domain;; Leucine Rich repeats (2 copies);; Leucine rich repeat;; Leucine Rich Repeat;; Leucine Rich repeat;; Leucine rich repeat;; Carbohydrate-binding protein of the ER	Probable LRR receptor-like serine/threonine-protein kinase At1g53440 (Precursor) GN=At1g53440 OS=Arabidopsis thaliana (Mouse-ear cress) PE=2 SV=2	S	Function unknown	PREDICTED: probable LRR receptor-like serine/threonine-protein kinase At1g53440-like isoform X3 [Setaria italica]
Seita.1G025700	Seita.1G025700	0.807204	37	0.18579	12	0.234441	12	0.559785	26	0.500084	28	0.85517	41	--	--	--	--	--	--	--	--	--	--	--	--	--	--	--
Seita.1G025800	Seita.1G025800	23.8687	1609	74.9991	7006	89.0455	7118	60.3329	4153	61.5018	5498	53.6018	3908	0.995214	0.276444	normal	--	--	Molecular Function: sequence-specific DNA binding transcription factor activity (GO:0003700);; Cellular Component: nucleus (GO:0005634);; Biological Process: regulation of transcription, DNA-templated (GO:0006355);; Biological Process: response to heat (GO:0009408);; Molecular Function: sequence-specific DNA binding (GO:0043565);;	K09419|5.76611e-125|sita:101770723|heat stress transcription factor C-2a-like; K09419 heat shock transcription factor, other eukaryote (A)	--	[K]	Transcription	HSF-type DNA-binding	Heat stress transcription factor C-2a GN=OJ1705_E12.15 OS=Oryza sativa subsp. japonica (Rice) PE=2 SV=1	K	Transcription	PREDICTED: heat stress transcription factor C-2a-like [Setaria italica]
Seita.1G025900	Seita.1G025900	0	0	0.048781	2	0.036602	2	0	0	0.0166	1	0	0	--	--	--	[K]	Transcription	Molecular Function: sequence-specific DNA binding transcription factor activity (GO:0003700);; Cellular Component: nucleus (GO:0005634);; Biological Process: regulation of transcription, DNA-templated (GO:0006355);; Biological Process: response to heat (GO:0009408);; Molecular Function: sequence-specific DNA binding (GO:0043565);;	K09419|1.77584e-18|sita:101770723|heat stress transcription factor C-2a-like; K09419 heat shock transcription factor, other eukaryote (A)	--	[K]	Transcription	HSF-type DNA-binding	Heat stress transcription factor C-2a GN=OJ1705_E12.15 OS=Oryza sativa subsp. japonica (Rice) PE=2 SV=1	K	Transcription	PREDICTED: heat stress transcription factor C-2a-like [Setaria italica]
Seita.1G026000	Seita.1G026000	0	0	0	0	0	0	0	0	0	0	0	0	--	--	--	--	--	--	K16223|1.13066e-133|sita:101772876|protein HEADING DATE 3B-like; K16223 protein FLOWERING LOCUS T (A)	Circadian rhythm - plant (ko04712)	[R]	General function prediction only	Phosphatidylethanolamine-binding protein	Protein FLOWERING LOCUS T GN=FT OS=Arabidopsis thaliana (Mouse-ear cress) PE=1 SV=2	R	General function prediction only	PREDICTED: protein HEADING DATE 3B-like [Setaria italica]
Seita.1G026100	Seita.1G026100	45.7695	3326	37.0697	3550	38.9706	3190	53.4519	3898	43.068	3758	56.3559	4267	0.981967	-0.250792	normal	[C]	Energy production and conversion	Molecular Function: citrate (Si)-synthase activity (GO:0004108);; Cellular Component: peroxisome (GO:0005777);; Biological Process: tricarboxylic acid cycle (GO:0006099);; Biological Process: fatty acid beta-oxidation (GO:0006635);; Cellular Component: plastid (GO:0009536);; Biological Process: cellular carbohydrate metabolic process (GO:0044262);;	K01647|0|sita:101771119|citrate synthase 3, peroxisomal-like; K01647 citrate synthase [EC:2.3.3.1] (A)	Citrate cycle (TCA cycle) (ko00020);; Glyoxylate and dicarboxylate metabolism (ko00630);; Carbon metabolism (ko01200);; 2-Oxocarboxylic acid metabolism (ko01210);; Biosynthesis of amino acids (ko01230)	[C]	Energy production and conversion	Citrate synthase	Citrate synthase 3, peroxisomal (Precursor) GN=CSY3 OS=Arabidopsis thaliana (Mouse-ear cress) PE=2 SV=1	C	Energy production and conversion	PREDICTED: citrate synthase 3, peroxisomal-like [Setaria italica]
Seita.1G026200	Seita.1G026200	9.31465	1323	9.07103	1697	8.99623	1439	10.4552	1490	8.51034	1451	9.30314	1376	1	0.0492993	normal	--	--	--	K13172|0|sita:101771516|ABC transporter F family member 4-like; K13172 serine/arginine repetitive matrix protein 2 (A)	--	[A]	RNA processing and modification	cwf21 domain	--	A	RNA processing and modification	PREDICTED: ABC transporter F family member 4-like [Setaria italica]
Seita.1G026300	Seita.1G026300	0.240466	10	0	0	0.140809	7	0.099083	4	0.079329	4	0.047721	2	--	--	--	[M]	Cell wall/membrane/envelope biogenesis	Molecular Function: dTDP-4-dehydrorhamnose reductase activity (GO:0008831);; Biological Process: mucilage biosynthetic process (GO:0010192);; Biological Process: seed coat development (GO:0010214);; Biological Process: UDP-rhamnose biosynthetic process (GO:0010253);; Molecular Function: UDP-L-rhamnose synthase activity (GO:0010280);; Biological Process: auxin efflux (GO:0010315);; Biological Proc…	K12450|0|obr:102703367|probable rhamnose biosynthetic enzyme 3-like; K12450 UDP-glucose 4,6-dehydratase [EC:4.2.1.76] (A)	Amino sugar and nucleotide sugar metabolism (ko00520)	[G]	Carbohydrate transport and metabolism	NAD dependent epimerase/dehydratase family;; Male sterility protein;; 3-beta hydroxysteroid dehydrogenase/isomerase family;; RmlD substrate binding domain;; Polysaccharide biosynthesis protein	UDP-4-keto-6-deoxy-D-glucose 3,5-epimerase/UDP-4-keto-L-rhamnose 4-keto-reductase {ECO:0000305|PubMed:17190829} GN=At1g78570 OS=Arabidopsis thaliana (Mouse-ear cress) PE=1 SV=1	G	Carbohydrate transport and metabolism	PREDICTED: probable rhamnose biosynthetic enzyme 3-like [Oryza brachyantha]
Seita.1G026400	Seita.1G026400	0.052732	1	0.04796	2	0.32023	6	0.163052	3	0.064685	2	0.031239	1	--	--	--	[M]	Cell wall/membrane/envelope biogenesis	Molecular Function: nucleotide binding (GO:0000166);; Cellular Component: cytosol (GO:0005829);; Molecular Function: dTDP-glucose 4,6-dehydratase activity (GO:0008460);; Molecular Function: dTDP-4-dehydrorhamnose reductase activity (GO:0008831);; Cellular Component: plasmodesma (GO:0009506);; Biological Process: mucilage biosynthetic process (GO:0010192);; Biological Process: seed coat developmen…	K12450|6.2135e-24|ath:AT1G53500|MUM4; putative NDP-L-rhamnose synthase; K12450 UDP-glucose 4,6-dehydratase [EC:4.2.1.76] (A)	Amino sugar and nucleotide sugar metabolism (ko00520)	[G]	Carbohydrate transport and metabolism	NAD dependent epimerase/dehydratase family	UDP-4-keto-6-deoxy-D-glucose 3,5-epimerase/UDP-4-keto-L-rhamnose 4-keto-reductase {ECO:0000303|PubMed:17190829} GN=At1g53500 OS=Arabidopsis thaliana (Mouse-ear cress) PE=1 SV=1	G	Carbohydrate transport and metabolism	BnaA05g14410D [Brassica napus]
Seita.1G026500	Seita.1G026500	0.199743	18	7.27282	859	5.24382	530	3.06417	277	4.53972	489	5.05195	473	0.999357	0.238499	normal	[M]	Cell wall/membrane/envelope biogenesis	Molecular Function: dTDP-4-dehydrorhamnose reductase activity (GO:0008831);; Biological Process: mucilage biosynthetic process (GO:0010192);; Biological Process: seed coat development (GO:0010214);; Biological Process: UDP-rhamnose biosynthetic process (GO:0010253);; Molecular Function: UDP-L-rhamnose synthase activity (GO:0010280);; Biological Process: auxin efflux (GO:0010315);; Biological Proc…	K12450|0|obr:102703367|probable rhamnose biosynthetic enzyme 3-like; K12450 UDP-glucose 4,6-dehydratase [EC:4.2.1.76] (A)	Amino sugar and nucleotide sugar metabolism (ko00520)	[G]	Carbohydrate transport and metabolism	NAD dependent epimerase/dehydratase family;; 3-beta hydroxysteroid dehydrogenase/isomerase family;; Male sterility protein;; Polysaccharide biosynthesis protein;; RmlD substrate binding domain	UDP-4-keto-6-deoxy-D-glucose 3,5-epimerase/UDP-4-keto-L-rhamnose 4-keto-reductase {ECO:0000305|PubMed:17190829} GN=At1g78570 OS=Arabidopsis thaliana (Mouse-ear cress) PE=1 SV=1	G	Carbohydrate transport and metabolism	PREDICTED: probable rhamnose biosynthetic enzyme 3-like [Oryza brachyantha]
Seita.1G026600	Seita.1G026600	0.010199	1	0.006672	1	0	0	0.016998	1	0.021972	2	0.033526	2	--	--	--	--	--	Cellular Component: cytoplasmic membrane-bounded vesicle (GO:0016023);;	--	--	--	--	--	Protodermal factor 1 (Precursor) GN=PDF1 OS=Arabidopsis thaliana (Mouse-ear cress) PE=2 SV=1	R	General function prediction only	PREDICTED: protodermal factor 1-like [Setaria italica]
Seita.1G026700	Seita.1G026700	0.245455	4	0.077152	2	0	0	0.03302	1	0.064784	2	0.107984	2	--	--	--	--	--	--	--	--	--	--	--	--	--	--	--
Seita.1G026800	Seita.1G026800	0.105604	2	0	0	0.094095	2	0	0	0	0	0	0	--	--	--	--	--	--	--	--	--	--	Stigma-specific protein, Stig1	--	S	Function unknown	PREDICTED: keratin-associated protein 5-1-like [Setaria italica]
Seita.1G026900	Seita.1G026900	0.074646	7	0	0	0.021464	2	0	0	0	0	0.023883	3	--	--	--	--	--	Molecular Function: DNA binding (GO:0003677);; Molecular Function: sequence-specific DNA binding transcription factor activity (GO:0003700);; Biological Process: regulation of transcription, DNA-templated (GO:0006355);; Molecular Function: protein dimerization activity (GO:0046983);;	--	--	--	--	Helix-loop-helix DNA-binding domain	--	K	Transcription	PREDICTED: uncharacterized protein LOC101774908 [Setaria italica]
Seita.1G027000	Seita.1G027000	0.386846	16	0.43895	24	0.450056	21	0	0	0.081064	5	1.23574	53	--	--	--	--	--	Molecular Function: DNA binding (GO:0003677);; Molecular Function: sequence-specific DNA binding transcription factor activity (GO:0003700);; Cellular Component: nucleus (GO:0005634);; Biological Process: regulation of transcription, DNA-templated (GO:0006355);;	K09286|5.83672e-102|sita:101773683|dehydration-responsive element-binding protein 3-like; K09286 EREBP-like factor (A)	--	--	--	AP2 domain	Dehydration-responsive element-binding protein 3 GN=F15N18.180 OS=Arabidopsis thaliana (Mouse-ear cress) PE=2 SV=1	S	Function unknown	PREDICTED: dehydration-responsive element-binding protein 3-like [Setaria italica]
Seita.1G027100	Seita.1G027100	0.796728	40	0.091022	6	0.107211	6	0.040111	3	0.033529	3	0.076243	4	--	--	--	--	--	Molecular Function: DNA binding (GO:0003677);; Molecular Function: sequence-specific DNA binding transcription factor activity (GO:0003700);; Cellular Component: nucleus (GO:0005634);; Biological Process: regulation of transcription, DNA-templated (GO:0006355);;	K09286|4.6317e-111|sita:101774092|dehydration-responsive element-binding protein 3-like; K09286 EREBP-like factor (A)	--	--	--	AP2 domain	Dehydration-responsive element-binding protein 3 GN=F15N18.180 OS=Arabidopsis thaliana (Mouse-ear cress) PE=2 SV=1	K	Transcription	PREDICTED: dehydration-responsive element-binding protein 3-like [Setaria italica]
Seita.1G027200	Seita.1G027200	0.284495	8	0	0	0.065606	2	0	0	0.064116	2	0	0	--	--	--	--	--	Molecular Function: DNA binding (GO:0003677);; Molecular Function: sequence-specific DNA binding transcription factor activity (GO:0003700);; Cellular Component: nucleus (GO:0005634);; Biological Process: regulation of transcription, DNA-templated (GO:0006355);;	K09286|1.10781e-48|sita:101773683|dehydration-responsive element-binding protein 3-like; K09286 EREBP-like factor (A)	--	--	--	AP2 domain	Ethylene-responsive transcription factor ERF034 OS=Arabidopsis thaliana (Mouse-ear cress) PE=2 SV=2	S	Function unknown	PREDICTED: dehydration-responsive element-binding protein 3-like [Setaria italica]
Seita.1G027300	Seita.1G027300	0.085194	3	0	0	0	0	0	0	0	0	0	0	--	--	--	--	--	Cellular Component: mitochondrion (GO:0005739);; Cellular Component: cytoplasmic membrane-bounded vesicle (GO:0016023);;	--	--	--	--	Plastocyanin-like domain	Early nodulin-like protein 1 (Precursor) GN=At2g25060 OS=Arabidopsis thaliana (Mouse-ear cress) PE=1 SV=2	R	General function prediction only	PREDICTED: early nodulin-like protein 2-like [Setaria italica]
Seita.1G027400	Seita.1G027400	8.86617	556	6.85416	566	6.51622	460	13.4621	846	15.4201	1159	13.9367	909	0.407167	-0.880089	normal	[S]	Function unknown	--	K17550|0|sita:101774895|protein phosphatase 1 regulatory subunit pprA-like; K17550 protein phosphatase 1 regulatory subunit 7 (A)	--	[T]	Signal transduction mechanisms	Leucine Rich repeats (2 copies);; Leucine rich repeat;; Leucine Rich Repeat;; Leucine Rich repeat;; Leucine rich repeat;; Leucine-rich repeat	Plant intracellular Ras-group-related LRR protein 3 GN=OSJNBa0044K18.1 OS=Oryza sativa subsp. japonica (Rice) PE=2 SV=3	T	Signal transduction mechanisms	PREDICTED: protein phosphatase 1 regulatory subunit pprA-like [Setaria italica]
Seita.1G027500	Seita.1G027500	10.7153	321	4.49287	179	5.93684	203	5.64763	170	5.14703	187	4.11365	129	0.923617	0.519124	normal	--	--	Cellular Component: mitochondrion (GO:0005739);; Cellular Component: plastid (GO:0009536);; Biological Process: defense response to bacterium (GO:0042742);; Biological Process: root development (GO:0048364);; Biological Process: defense response to fungus (GO:0050832);; Biological Process: cell wall repair (GO:0071433);;	--	--	--	--	--	--	S	Function unknown	PREDICTED: uncharacterized protein LOC101775306 isoform X1 [Setaria italica]
Seita.1G027600	Seita.1G027600	0.0845	2	0.38129	12	0.337972	9	0.153761	4	0.267418	8	0.080837	2	--	--	--	--	--	Cellular Component: cytoplasmic membrane-bounded vesicle (GO:0016023);;	--	--	--	--	Protein of unknown function (DUF1677)	--	S	Function unknown	PREDICTED: uncharacterized protein LOC101775971 [Setaria italica]
Seita.1G027700	Seita.1G027700	3.33627	227	1.85541	167	1.91244	147	1.19856	82	0.462989	38	0.392937	28	0.0818732	1.83568	normal	--	--	--	--	--	--	--	Cotton fibre expressed protein	--	S	Function unknown	PREDICTED: uncharacterized protein LOC101776376 [Setaria italica]
Seita.1G027800	Seita.1G027800	0	0	0	0	0	0	0	0	0	0	0	0	--	--	--	--	--	--	--	--	--	--	--	--	--	--	--
Seita.1G027900	Seita.1G027900	0.300073	48	0.07506	16	0.120084	22	0.219089	35	0.165448	32	0.019286	4	--	--	--	[Z]	Cytoskeleton	Molecular Function: microtubule motor activity (GO:0003777);; Molecular Function: ATP binding (GO:0005524);; Cellular Component: mitochondrion (GO:0005739);; Cellular Component: kinesin complex (GO:0005871);; Cellular Component: microtubule (GO:0005874);; Biological Process: microtubule-based movement (GO:0007018);; Molecular Function: microtubule binding (GO:0008017);; Cellular Component: plasti…	K10406|0|sita:101776780|kinesin-like protein 1-like; K10406 kinesin family member C2/C3 (A)	--	[Z]	Cytoskeleton	Kinesin motor domain	Kinesin KP1 GN=KP1 OS=Arabidopsis thaliana (Mouse-ear cress) PE=1 SV=2	Z	Cytoskeleton	PREDICTED: LOW QUALITY PROTEIN: kinesin-like protein 1-like [Setaria italica]
Seita.1G028000	Seita.1G028000	18.3048	2183	1.98032	311	2.30155	310	4.99928	600	5.00065	718	3.63315	452	0.97742	0.579559	normal	[GEPR]	Carbohydrate transport and metabolism;; Amino acid transport and metabolism;; Inorganic ion transport and metabolism;; General function prediction only	Molecular Function: sugar:proton symporter activity (GO:0005351);; Cellular Component: plasma membrane (GO:0005886);; Biological Process: carbohydrate transport (GO:0008643);; Biological Process: response to nematode (GO:0009624);; Cellular Component: plant-type vacuole membrane (GO:0009705);; Cellular Component: integral component of membrane (GO:0016021);; Biological Process: transmembrane tran…	--	--	[R]	General function prediction only	Sugar (and other) transporter;; Major Facilitator Superfamily	Monosaccharide-sensing protein 2 GN=MSSP2 OS=Arabidopsis thaliana (Mouse-ear cress) PE=1 SV=2	R	General function prediction only	PREDICTED: monosaccharide-sensing protein 2-like [Setaria italica]
Seita.1G028100	Seita.1G028100	0.051297	3	0.280614	15	0.522896	24	1.20018	49	1.002	49	0.588961	25	--	--	--	--	--	Cellular Component: cytoplasmic membrane-bounded vesicle (GO:0016023);;	--	--	--	--	--	--	R	General function prediction only	hypothetical protein ZEAMMB73_869322 [Zea mays]
Seita.1G028200	Seita.1G028200	0	0	0.188243	6	0.364055	10	0.49495	13	0.343398	10	0.017481	1	--	--	--	--	--	--	--	--	--	--	--	--	R	General function prediction only	hypothetical protein TRIUR3_10135 [Triticum urartu]
Seita.1G028300	Seita.1G028300	138.942	4550	117.043	5051	115.419	4257	116.071	3815	93.7842	3687	76.7917	2620	0.897875	0.454799	normal	[J]	Translation, ribosomal structure and biogenesis	Molecular Function: nucleotide binding (GO:0000166);; Molecular Function: structural constituent of ribosome (GO:0003735);; Cellular Component: cell wall (GO:0005618);; Cellular Component: nucleolus (GO:0005730);; Cellular Component: plasma membrane (GO:0005886);; Biological Process: translation (GO:0006412);; Cellular Component: chloroplast (GO:0009507);; Cellular Component: cytosolic small ribo…	K02974|9.74056e-87|sita:101777605|40S ribosomal protein S24-1-like; K02974 small subunit ribosomal protein S24e (A)	Ribosome (ko03010)	[J]	Translation, ribosomal structure and biogenesis	Ribosomal protein S24e	40S ribosomal protein S24-2 GN=RPS24B OS=Arabidopsis thaliana (Mouse-ear cress) PE=2 SV=2	J	Translation, ribosomal structure and biogenesis	PREDICTED: 40S ribosomal protein S24-1-like [Setaria italica]
Seita.1G028400	Seita.1G028400	3.66098	235	3.1956	271	3.3141	240	16.039	1033	12.0082	925	13.8642	927	0.00262641	-1.95381	down	--	--	Cellular Component: nucleus (GO:0005634);; Biological Process: regulation of transcription, DNA-templated (GO:0006355);; Biological Process: regulation of translation (GO:0006417);; Biological Process: auxin-activated signaling pathway (GO:0009734);; Molecular Function: protein dimerization activity (GO:0046983);;	K14484|1.45103e-175|sita:101778027|auxin-responsive protein IAA7-like; K14484 auxin-responsive protein IAA (A)	Plant hormone signal transduction (ko04075)	--	--	AUX/IAA family	Auxin-responsive protein IAA7 OS=Oryza sativa subsp. japonica (Rice) PE=2 SV=1	K	Transcription	PREDICTED: auxin-responsive protein IAA7-like isoform X1 [Setaria italica]
Seita.1G028500	Seita.1G028500	0.024718	1	0	0	0	0	0.203422	7	0.170374	7	0.183273	7	--	--	--	--	--	--	--	--	--	--	--	--	--	--	--
Seita.1G028600	Seita.1G028600	0.18069	3	0.107397	3	0.464927	8	4.66353	67	3.90417	67	4.29697	64	1.11068e-06	-3.76305	down	--	--	--	--	--	--	--	--	--	--	--	--
Seita.1G028700	Seita.1G028700	82.6431	12084	39.0431	7477	43.4224	7135	32.3359	4748	32.2911	5660	48.1066	7055	0.813833	0.58295	normal	[RTKL]	General function prediction only;; Signal transduction mechanisms;; Transcription;; Replication, recombination and repair	Molecular Function: protein serine/threonine kinase activity (GO:0004674);; Molecular Function: ATP binding (GO:0005524);; Cellular Component: plasma membrane (GO:0005886);; Biological Process: protein phosphorylation (GO:0006468);; Cellular Component: integral component of membrane (GO:0016021);; Cellular Component: cytoplasmic membrane-bounded vesicle (GO:0016023);;	--	--	--	--	Leucine Rich repeats (2 copies);; Protein kinase domain;; Protein tyrosine kinase;; Leucine rich repeat;; Leucine Rich Repeat;; Leucine Rich repeat;; Leucine rich repeat N-terminal domain;; Leucine rich repeat	Receptor-like protein kinase HSL1 (Precursor) GN=HSL1 OS=Arabidopsis thaliana (Mouse-ear cress) PE=2 SV=1	T	Signal transduction mechanisms	PREDICTED: receptor-like protein kinase HSL1-like [Setaria italica]
Seita.1G028800	Seita.1G028800	14.553	784	9.07359	645	0	0	0	0	1.24206	81	8.66832	487	0.871581	1.20044	normal	--	--	Molecular Function: nucleotide binding (GO:0000166);; Molecular Function: protein kinase activity (GO:0004672);; Cellular Component: membrane (GO:0016020);; Cellular Component: cytoplasmic membrane-bounded vesicle (GO:0016023);; Biological Process: phosphorylation (GO:0016310);;	--	--	--	--	Leucine Rich repeats (2 copies);; Leucine rich repeat;; Leucine Rich Repeat;; Leucine Rich repeat;; Leucine rich repeat	Receptor-like protein kinase 5 (Precursor) GN=F21O9.180 OS=Arabidopsis thaliana (Mouse-ear cress) PE=1 SV=1	T	Signal transduction mechanisms	PREDICTED: receptor-like protein kinase HSL1-like [Setaria italica]
Seita.1G028900	Seita.1G028900	29.0583	902	4.38606	180	5.04134	177	14.2665	445	16.0809	600	16.3975	531	0.988378	-0.399657	normal	--	--	--	--	--	--	--	Domain of unknown function (DUF4228)	--	S	Function unknown	PREDICTED: uncharacterized protein LOC101779099 [Setaria italica]
Seita.1G029000	Seita.1G029000	4.98688	801	3.12395	656	2.75404	495	2.09353	331	2.46652	475	3.45568	578	0.884288	0.472333	normal	[A]	RNA processing and modification	Molecular Function: RNA binding (GO:0003723);; Molecular Function: polynucleotide adenylyltransferase activity (GO:0004652);; Cellular Component: nucleus (GO:0005634);; Biological Process: RNA polyadenylation (GO:0043631);;	K14376|0|sita:101779504|poly(A) polymerase-like; K14376 poly(A) polymerase [EC:2.7.7.19] (A)	mRNA surveillance pathway (ko03015)	[A]	RNA processing and modification	Poly(A) polymerase central domain;; Poly(A) polymerase predicted RNA binding domain;; Nucleotidyltransferase domain	Nuclear poly(A) polymerase 4 {ECO:0000303|PubMed:18479511} OS=Arabidopsis thaliana (Mouse-ear cress) PE=1 SV=1	A	RNA processing and modification	PREDICTED: poly(A) polymerase-like isoform X1 [Setaria italica]
Seita.1G029100	Seita.1G029100	35.4604	1392	33.8553	1713	34.0462	1477	60.3518	2318	72.1561	3277	59.5134	2378	0.469484	-0.783843	normal	--	--	Cellular Component: mitochondrion (GO:0005739);; Biological Process: response to ethylene (GO:0009723);;	--	--	--	--	Early nodulin 93 ENOD93 protein	Early nodulin-93 OS=Glycine max (Soybean) PE=2 SV=1	S	Function unknown	PREDICTED: early nodulin-93-like [Setaria italica]
Seita.1G029200	Seita.1G029200	0	0	0	0	0.038097	2	0	0	0	0	0	0	--	--	--	--	--	Biological Process: biosynthetic process (GO:0009058);; Molecular Function: transferase activity, transferring acyl groups other than amino-acyl groups (GO:0016747);;	--	--	--	--	Chalcone and stilbene synthases, N-terminal domain;; Chalcone and stilbene synthases, C-terminal domain;; 3-Oxoacyl-[acyl-carrier-protein (ACP)] synthase III;; 3-Oxoacyl-[acyl-carrier-protein (ACP)] synthase III C terminal;; FAE1/Type III polyketide synthase-like protein	Phenylpropanoylacetyl-CoA synthase GN=DCS OS=Curcuma longa (Turmeric) PE=1 SV=1	S	Function unknown	PREDICTED: bisdemethoxycurcumin synthase-like [Setaria italica]
Seita.1G029300	Seita.1G029300	0	0	0	0	0	0	0	0	0	0	0	0	--	--	--	--	--	--	--	--	--	--	--	Protein SAWADEE HOMEODOMAIN HOMOLOG 2 GN=SHH2 OS=Arabidopsis thaliana (Mouse-ear cress) PE=2 SV=1	R	General function prediction only	PREDICTED: uncharacterized protein LOC101778573 [Setaria italica]
Seita.1G029400	Seita.1G029400	1.22112	32	0.147413	6	0.198096	6	0.348246	10	0.162362	6	0.063669	2	--	--	--	--	--	Molecular Function: zinc ion binding (GO:0008270);; Cellular Component: cytoplasmic membrane-bounded vesicle (GO:0016023);;	--	--	[O]	Posttranslational modification, protein turnover, chaperones	Ring finger domain;; RING-H2 zinc finger;; Anaphase-promoting complex subunit 11 RING-H2 finger;; Zinc finger, C3HC4 type (RING finger)	NEP1-interacting protein 1 GN=F4B14.110 OS=Arabidopsis thaliana (Mouse-ear cress) PE=1 SV=2	O	Posttranslational modification, protein turnover, chaperones	PREDICTED: uncharacterized protein LOC101779390 [Setaria italica]
Seita.1G029500	Seita.1G029500	1.96528	57	0.209546	8	0.305697	10	0.308683	9	0.115107	5	0.009285	1	--	--	--	--	--	Molecular Function: zinc ion binding (GO:0008270);; Cellular Component: cytoplasmic membrane-bounded vesicle (GO:0016023);;	--	--	[O]	Posttranslational modification, protein turnover, chaperones	Ring finger domain;; Anaphase-promoting complex subunit 11 RING-H2 finger;; Zinc finger, C3HC4 type (RING finger)	RING-H2 finger protein ATL32 (Precursor) GN=ATL32 OS=Arabidopsis thaliana (Mouse-ear cress) PE=2 SV=3	O	Posttranslational modification, protein turnover, chaperones	PREDICTED: uncharacterized protein LOC101779390 [Setaria italica]
Seita.1G029600	Seita.1G029600	0.818494	22	1.3521	47	1.32587	40	0	0	0.062229	2	0.145849	5	--	--	--	--	--	--	--	--	--	--	Protein of unknown function (DUF_B2219)	--	--	--	--
Seita.1G029700	Seita.1G029700	0	0	0	0	0	0	0.031179	1	0	0	0	0	--	--	--	--	--	--	--	--	--	--	--	--	R	General function prediction only	PREDICTED: uncharacterized protein LOC101758143 [Setaria italica]
Seita.1G029800	Seita.1G029800	0	0	0	0	0	0	0.011505	1	0	0	0	0	--	--	--	--	--	--	--	--	--	--	--	--	R	General function prediction only	PREDICTED: uncharacterized protein LOC101758143 [Setaria italica]
Seita.1G029900	Seita.1G029900	0	0	0	0	0	0	0	0	0	0	0	0	--	--	--	--	--	--	--	--	--	--	--	--	R	General function prediction only	PREDICTED: uncharacterized protein LOC101757731 [Setaria italica]
Seita.1G030000	Seita.1G030000	0	0	0	0	0	0	0	0	0	0	0	0	--	--	--	--	--	--	--	--	--	--	--	--	R	General function prediction only	PREDICTED: uncharacterized protein LOC101758143 [Setaria italica]
Seita.1G030100	Seita.1G030100	0	0	0	0	0	0	0	0	0	0	0	0	--	--	--	--	--	Molecular Function: peptidase activity (GO:0008233);;	--	--	[O]	Posttranslational modification, protein turnover, chaperones	Papain family cysteine protease;; Cathepsin propeptide inhibitor domain (I29);; Peptidase C1-like family	Senescence-specific cysteine protease SAG12 {ECO:0000305} (Precursor) OS=Arabidopsis thaliana (Mouse-ear cress) PE=1 SV=1	O	Posttranslational modification, protein turnover, chaperones	PREDICTED: xylem cysteine proteinase 2-like [Setaria italica]
Seita.1G030200	Seita.1G030200	4.65442	212	1.21423	73	0.484088	25	0.897038	41	0.692977	38	0.515105	25	0.700115	1.49009	normal	--	--	--	--	--	[K]	Transcription	--	--	K	Transcription	PREDICTED: uncharacterized protein LOC102699564 [Oryza brachyantha]
Seita.1G030300	Seita.1G030300	5.20512	423	3.12017	334	3.04285	278	2.73151	223	2.33966	228	2.68483	227	0.864927	0.589217	normal	--	--	Molecular Function: metalloendopeptidase activity (GO:0004222);; Biological Process: rRNA processing (GO:0006364);; Cellular Component: chloroplast (GO:0009507);; Molecular Function: metal ion binding (GO:0046872);;	--	--	--	--	Uncharacterized protein family UPF0054;; haloacid dehalogenase-like hydrolase	--	R	General function prediction only	PREDICTED: uncharacterized protein LOC101755978 isoform X1 [Setaria italica]
Seita.1G030400	Seita.1G030400	1.95397	336	0.473751	108	0.555094	108	0.391848	68	0.283944	59	0.485125	87	0.464795	1.29628	normal	--	--	Cellular Component: mitochondrion (GO:0005739);; Biological Process: RNA splicing (GO:0008380);; Biological Process: response to abscisic acid (GO:0009737);;	--	--	[R]	General function prediction only	PPR repeat family;; PPR repeat;; PPR repeat;; Pentatricopeptide repeat domain;; Evolutionarily conserved signalling intermediate in Toll pathway;; Tetratricopeptide repeat;; Rab-GTPase-TBC domain	Pentatricopeptide repeat-containing protein At1g51965, mitochondrial (Precursor) GN=At1g51965 OS=Arabidopsis thaliana (Mouse-ear cress) PE=2 SV=1	R	General function prediction only	PREDICTED: pentatricopeptide repeat-containing protein At1g51965, mitochondrial-like isoform X1 [Setaria italica]
Seita.1G030500	Seita.1G030500	1.4015	88	0.502995	42	2.28544	190	3.3998	214	1.10522	83	2.43415	159	0.95611	-0.482488	normal	--	--	Biological Process: abscisic acid-activated signaling pathway (GO:0009738);;	K14496|9.91752e-123|sita:101754623|abscisic acid receptor PYL2-like; K14496 abscisic acid receptor PYR/PYL family (A)	Plant hormone signal transduction (ko04075)	--	--	Polyketide cyclase / dehydrase and lipid transport;; Pathogenesis-related protein Bet v I family;; Polyketide cyclase / dehydrase and lipid transport	Abscisic acid receptor PYL2 GN=T19L18.15 OS=Arabidopsis thaliana (Mouse-ear cress) PE=1 SV=1	R	General function prediction only	PREDICTED: abscisic acid receptor PYL2-like isoform X1 [Setaria italica]
Seita.1G030600	Seita.1G030600	0.447198	56	0.142858	24	0.137133	15	0.265841	32	0.212641	32	0.17267	20	--	--	--	--	--	Molecular Function: sequence-specific DNA binding transcription factor activity (GO:0003700);; Cellular Component: nucleus (GO:0005634);; Biological Process: regulation of transcription, DNA-templated (GO:0006355);; Molecular Function: sequence-specific DNA binding (GO:0043565);;	--	--	[K]	Transcription	Homeobox KN domain;; Associated with HOX;; Homeobox domain	Homeobox protein ATH1 GN=ATH1 OS=Arabidopsis thaliana (Mouse-ear cress) PE=1 SV=1	K	Transcription	PREDICTED: homeobox protein ATH1-like isoform X1 [Setaria italica]
Seita.1G030700	Seita.1G030700	0	0	0	0	0	0	0.008505	1	0	0	0.036866	1	--	--	--	--	--	--	--	--	--	--	--	--	--	--	--
Seita.1G030800	Seita.1G030800	0.162632	5	0	0	0	0	0.037209	2	0.087045	3	0.005257	1	--	--	--	--	--	--	--	--	--	--	--	--	--	--	--
Seita.1G030900	Seita.1G030900	6.61188	634	9.92306	1253	9.76608	1054	12.3653	1189	13.8001	1588	12.3254	1231	0.878518	-0.416982	normal	--	--	Molecular Function: transporter activity (GO:0005215);; Cellular Component: mitochondrial inner membrane (GO:0005743);; Biological Process: mitochondrial transport (GO:0006839);; Cellular Component: plastid (GO:0009536);; Cellular Component: integral component of membrane (GO:0016021);; Biological Process: transmembrane transport (GO:0055085);;	K15084|0|sita:101786747|mitochondrial substrate carrier family protein B-like; K15084 solute carrier family 25 (mitochondrial carrier protein), member 16 (A)	--	[C]	Energy production and conversion	Mitochondrial carrier protein	Mitochondrial adenine nucleotide transporter ADNT1 OS=Arabidopsis thaliana (Mouse-ear cress) PE=2 SV=1	C	Energy production and conversion	PREDICTED: mitochondrial substrate carrier family protein B-like [Setaria italica]
Seita.1G031000	Seita.1G031000	21.2651	1002	26.064	1598	23.9413	1246	20.0969	967	21.3557	1222	19.629	971	0.97183	0.299616	normal	--	--	--	--	--	[S]	Function unknown	Protein of unknown function (DUF1168)	--	S	Function unknown	PREDICTED: PRKR-interacting protein 1-like isoform X1 [Setaria italica]
Seita.1G031100	Seita.1G031100	23.6047	1189	7.15183	475	5.09857	290	13.8622	701	12.504	756	11.1296	584	1	-0.125025	normal	--	--	Biological Process: dephosphorylation (GO:0016311);; Molecular Function: phosphatase activity (GO:0016791);;	K13248|0|sita:101785402|inorganic pyrophosphatase 1-like; K13248 pyridoxal phosphate phosphatase PHOSPHO2 [EC:3.1.3.74] (A)	Vitamin B6 metabolism (ko00750)	[R]	General function prediction only	Putative Phosphatase;; haloacid dehalogenase-like hydrolase;; Haloacid dehalogenase-like hydrolase	Inorganic pyrophosphatase 1 GN=PS2 OS=Arabidopsis thaliana (Mouse-ear cress) PE=1 SV=1	R	General function prediction only	PREDICTED: inorganic pyrophosphatase 1-like [Setaria italica]
Seita.1G031200	Seita.1G031200	0	0	0	0	0	0	0	0	0	0	0	0	--	--	--	--	--	--	--	--	--	--	No apical meristem-associated C-terminal domain	Glutathione S-transferase T3 GN=K1O13.1 OS=Arabidopsis thaliana (Mouse-ear cress) PE=2 SV=1	S	Function unknown	PREDICTED: glutathione S-transferase T3-like [Setaria italica]
Seita.1G031300	Seita.1G031300	18.1765	750	9.4791	515	10.904	507	14.9526	619	14.064	696	14.0759	605	0.999228	-0.130232	normal	--	--	Cellular Component: peroxisomal membrane (GO:0005778);; Cellular Component: integral component of membrane (GO:0016021);;	K13347|5.475e-122|sita:101785002|peroxisomal membrane protein PMP22-like; K13347 peroxisomal membrane protein 2 (A)	Peroxisome (ko04146)	[R]	General function prediction only	Mpv17 / PMP22 family	Peroxisomal membrane protein PMP22 GN=PMP22 OS=Arabidopsis thaliana (Mouse-ear cress) PE=1 SV=1	R	General function prediction only	PREDICTED: peroxisomal membrane protein PMP22-like [Setaria italica]
Seita.1G031400	Seita.1G031400	1.92908	127	0.762212	66	0.846541	63	0.768975	51	0.693131	55	0.539839	37	0.76832	0.813705	normal	--	--	Cellular Component: plastid (GO:0009536);;	--	--	--	--	Petal formation-expressed	Probable F-box protein At4g22030 GN=At4g22030 OS=Arabidopsis thaliana (Mouse-ear cress) PE=4 SV=1	R	General function prediction only	PREDICTED: probable F-box protein At4g22030-like [Setaria italica]
Seita.1G031500	Seita.1G031500	3.29281	194	3.31943	258	3.43091	228	2.98406	177	3.68654	261	2.61057	161	0.999228	0.207642	normal	--	--	Cellular Component: plastid (GO:0009536);;	--	--	--	--	Petal formation-expressed	Probable F-box protein At4g22030 GN=At4g22030 OS=Arabidopsis thaliana (Mouse-ear cress) PE=4 SV=1	R	General function prediction only	PREDICTED: probable F-box protein At4g22030-like [Setaria italica]
Seita.1G031600	Seita.1G031600	6.71916	653	1.80062	231	2.293	251	2.20984	216	2.75468	322	2.6078	264	0.916045	0.462488	normal	--	--	Biological Process: auxin transport (GO:0060918);;	--	--	[S]	Function unknown	Ndr family;; Alpha/beta hydrolase family;; alpha/beta hydrolase fold	Pollen-specific protein SF21 GN=SF21 OS=Helianthus annuus (Common sunflower) PE=2 SV=1	R	General function prediction only	PREDICTED: pollen-specific protein SF21-like isoform X2 [Setaria italica]
Seita.1G031700	Seita.1G031700	27.1112	1827	24.4526	2172	24.1439	1833	40.2657	2724	34.3884	2783	31.797	2233	0.905764	-0.404789	normal	[E]	Amino acid transport and metabolism	Molecular Function: aminopeptidase activity (GO:0004177);; Cellular Component: plastid (GO:0009536);; Biological Process: cellular process (GO:0009987);; Molecular Function: manganese ion binding (GO:0030145);;	K14213|0|sita:101783546|xaa-Pro dipeptidase-like; K14213 Xaa-Pro dipeptidase [EC:3.4.13.9] (A)	--	[R]	General function prediction only	Metallopeptidase family M24;; Aminopeptidase P, N-terminal domain	--	R	General function prediction only	PREDICTED: xaa-Pro dipeptidase-like [Setaria italica]
Seita.1G031800	Seita.1G031800	44.591	5026	15.766	2353	15.3654	2062	21.35	2645	20.6365	3113	21.0394	2664	0.996351	0.125301	normal	--	--	Molecular Function: RNA binding (GO:0003723);; Cellular Component: cytosol (GO:0005829);; Biological Process: protein import into nucleus (GO:0006606);;	K13210|0|sita:101782852|far upstream element-binding protein 2-like; K13210 far upstream element-binding protein (A)	--	[A]	RNA processing and modification	KH domain;; KH domain;; KH domain;; KH domain	--	A	RNA processing and modification	PREDICTED: far upstream element-binding protein 2-like isoform X2 [Setaria italica]
Seita.1G031900	Seita.1G031900	30.6793	2831	23.4939	2862	24.5099	2548	27.8529	2586	24.4571	2718	23.9823	2317	0.999228	0.111208	normal	[T]	Signal transduction mechanisms	Cellular Component: protein phosphatase type 2A complex (GO:0000159);; Biological Process: signal transduction (GO:0007165);; Molecular Function: protein phosphatase type 2A regulator activity (GO:0008601);;	K04354|0|sita:101782451|serine/threonine protein phosphatase 2A 55 kDa regulatory subunit B beta isoform-like; K04354 serine/threonine-protein phosphatase 2A regulatory subunit B (A)	mRNA surveillance pathway (ko03015)	[T]	Signal transduction mechanisms	WD domain, G-beta repeat	Serine/threonine protein phosphatase 2A 55 kDa regulatory subunit B beta isoform OS=Oryza sativa subsp. japonica (Rice) PE=2 SV=1	T	Signal transduction mechanisms	PREDICTED: serine/threonine protein phosphatase 2A 55 kDa regulatory subunit B beta isoform-like [Setaria italica]
Seita.1G032000	Seita.1G032000	165.982	10934	20.4297	1774	26.3057	1952	32.7241	2164	31.9822	2530	30.967	2126	0.89353	1.02175	normal	[T]	Signal transduction mechanisms	Molecular Function: phosphoprotein phosphatase activity (GO:0004721);; Biological Process: metabolic process (GO:0008152);; Molecular Function: metal ion binding (GO:0046872);;	--	--	[T]	Signal transduction mechanisms	Protein phosphatase 2C;; Protein phosphatase 2C	Probable protein phosphatase 2C 12 OS=Oryza sativa subsp. japonica (Rice) PE=2 SV=1	T	Signal transduction mechanisms	PREDICTED: probable protein phosphatase 2C 12-like [Setaria italica]
Seita.1G032100	Seita.1G032100	0	0	0	0	0	0	0	0	0	0	0	0	--	--	--	[C]	Energy production and conversion	--	K05575|6.02853e-15|mtr:MTR_4g006120|NADH dehydrogenase subunit; K05575 NAD(P)H-quinone oxidoreductase subunit 4 [EC:1.6.5.3] (A)	Oxidative phosphorylation (ko00190)	--	--	--	Photosystem I iron-sulfur center {ECO:0000255|HAMAP-Rule:MF_01303} OS=Sorghum bicolor (Sorghum) PE=3 SV=1	R	General function prediction only	NADH dehydrogenase subunit [Medicago truncatula]
Seita.1G032200	Seita.1G032200	0	0	0	0	0	0	0	0	0	0	0	0	--	--	--	--	--	--	--	--	--	--	--	--	S	Function unknown	PREDICTED: uncharacterized protein LOC101764697 [Setaria italica]
Seita.1G032300	Seita.1G032300	4.72587	321	4.05979	363	6.00401	450	0.525427	23	144.216	11740	0.83858	35	0.871581	-3.23511	normal	--	--	--	--	--	--	--	Domain of unknown function (DUF3511)	--	S	Function unknown	PREDICTED: uncharacterized protein LOC101758554 [Setaria italica]
Seita.1G032400	Seita.1G032400	17.5812	1113	11.8021	985	12.5504	895	13.8481	880	13.7053	1042	13.0945	864	0.999357	0.0995343	normal	[A]	RNA processing and modification	Molecular Function: ATP binding (GO:0005524);; Cellular Component: nucleus (GO:0005634);; Biological Process: mRNA processing (GO:0006397);; Biological Process: flower development (GO:0009908);; Biological Process: vegetative to reproductive phase transition of meristem (GO:0010228);; Biological Process: phyllome development (GO:0048827);;	K14399|0|sita:101758957|protein CLP1 homolog; K14399 polyribonucleotide 5'-hydroxyl-kinase [EC:2.7.1.78] (A)	mRNA surveillance pathway (ko03015)	[A]	RNA processing and modification	Pre-mRNA cleavage complex II protein Clp1;; Molybdopterin guanine dinucleotide synthesis protein B	Protein CLP1 homolog {ECO:0000255|HAMAP-Rule:MF_03035} GN=CLPS3 OS=Arabidopsis thaliana (Mouse-ear cress) PE=1 SV=1	A	RNA processing and modification	PREDICTED: protein CLP1 homolog [Setaria italica]
Seita.1G032500	Seita.1G032500	26.8442	1524	27.9851	2094	28.7598	1839	37.399	2130	35.8733	2445	37.6295	2225	0.954247	-0.305986	normal	[T]	Signal transduction mechanisms	Molecular Function: phosphoprotein phosphatase activity (GO:0004721);; Cellular Component: nucleus (GO:0005634);; Cellular Component: cytoplasm (GO:0005737);; Cellular Component: plasma membrane (GO:0005886);; Molecular Function: metal ion binding (GO:0046872);; Biological Process: regulation of auxin polar transport (GO:2000012);;	K04382|0|sita:101759356|serine/threonine-protein phosphatase PP2A-1 catalytic subunit-like; K04382 serine/threonine-protein phosphatase 2A catalytic subunit [EC:3.1.3.16] (A)	mRNA surveillance pathway (ko03015)	[T]	Signal transduction mechanisms	Calcineurin-like phosphoesterase	Serine/threonine-protein phosphatase PP2A-1 catalytic subunit OS=Oryza sativa subsp. japonica (Rice) PE=2 SV=1	T	Signal transduction mechanisms	PREDICTED: serine/threonine-protein phosphatase PP2A-1 catalytic subunit-like [Setaria italica]
Seita.1G032600	Seita.1G032600	8.73138	584	2.17779	192	2.54149	192	3.08742	208	2.8855	232	2.4103	168	0.856001	0.621469	normal	[J]	Translation, ribosomal structure and biogenesis	Cellular Component: plastid (GO:0009536);;	K15264|0|sita:101760175|putative methyltransferase NSUN5-like; K15264 putative methyltransferase [EC:2.1.1.-] (A)	--	[D]	Cell cycle control, cell division, chromosome partitioning	NOL1/NOP2/sun family;; Ribosomal RNA adenine dimethylase;; ubiE/COQ5 methyltransferase family	--	D	Cell cycle control, cell division, chromosome partitioning	PREDICTED: putative methyltransferase NSUN5-like [Setaria italica]
Seita.1G032700	Seita.1G032700	0.095992	2	0.146907	4	0.061981	2	0.039936	1	0.210529	6	0	0	--	--	--	[O]	Posttranslational modification, protein turnover, chaperones	Biological Process: protein folding (GO:0006457);; Biological Process: hyperosmotic response (GO:0006972);; Biological Process: response to heat (GO:0009408);; Biological Process: response to high light intensity (GO:0009644);; Biological Process: response to hydrogen peroxide (GO:0042542);; Molecular Function: unfolded protein binding (GO:0051082);;	K13993|6.08063e-96|sita:101759760|19.0 kDa class II heat shock protein-like; K13993 HSP20 family protein (A)	Protein processing in endoplasmic reticulum (ko04141)	[O]	Posttranslational modification, protein turnover, chaperones	Hsp20/alpha crystallin family	19.0 kDa class II heat shock protein OS=Oryza sativa subsp. japonica (Rice) PE=3 SV=1	O	Posttranslational modification, protein turnover, chaperones	PREDICTED: 19.0 kDa class II heat shock protein-like [Setaria italica]
Seita.1G032800	Seita.1G032800	26.7634	2934	14.2389	2057	15.4302	1905	22.8765	2516	16.7376	2203	23.4874	2682	0.999228	-0.130638	normal	[E]	Amino acid transport and metabolism	Molecular Function: aminopeptidase activity (GO:0004177);; Cellular Component: cytosol (GO:0005829);; Cellular Component: plasma membrane (GO:0005886);; Biological Process: gluconeogenesis (GO:0006094);; Biological Process: cytoskeleton organization (GO:0007010);; Molecular Function: metallopeptidase activity (GO:0008237);; Molecular Function: zinc ion binding (GO:0008270);; Biological Process: a…	K08776|0|sita:101760579|puromycin-sensitive aminopeptidase-like; K08776 puromycin-sensitive aminopeptidase [EC:3.4.11.-] (A)	--	[EO]	Amino acid transport and metabolism;; Posttranslational modification, protein turnover, chaperones	Peptidase family M1;; ERAP1-like C-terminal domain;; Peptidase MA superfamily	Aminopeptidase M1-A OS=Oryza sativa subsp. japonica (Rice) PE=2 SV=1	4553		PREDICTED: puromycin-sensitive aminopeptidase-like [Setaria italica]
Seita.1G032900	Seita.1G032900	0	0	0	0	0	0	0	0	0	0	0	0	--	--	--	[RTKL]	General function prediction only;; Signal transduction mechanisms;; Transcription;; Replication, recombination and repair	Molecular Function: protein serine/threonine kinase activity (GO:0004674);; Molecular Function: ATP binding (GO:0005524);; Biological Process: protein phosphorylation (GO:0006468);; Biological Process: response to stress (GO:0006950);;	--	--	[T]	Signal transduction mechanisms	Protein kinase domain;; Protein tyrosine kinase;; Universal stress protein family	Serine/threonine-protein kinase OS=Arabidopsis thaliana (Mouse-ear cress) PE=1 SV=2	T	Signal transduction mechanisms	PREDICTED: U-box domain-containing protein 52-like [Setaria italica]
Seita.1G033000	Seita.1G033000	0.020934	2	3.72688	457	2.624	275	0.842121	79	1.0144	114	0.624001	61	0.761968	1.59794	normal	[RTKL]	General function prediction only;; Signal transduction mechanisms;; Transcription;; Replication, recombination and repair	Cellular Component: ubiquitin ligase complex (GO:0000151);; Molecular Function: protein serine/threonine kinase activity (GO:0004674);; Molecular Function: ubiquitin-protein transferase activity (GO:0004842);; Molecular Function: ATP binding (GO:0005524);; Biological Process: protein phosphorylation (GO:0006468);; Biological Process: response to stress (GO:0006950);; Cellular Component: plastid (…	--	--	--	--	Protein kinase domain;; Protein tyrosine kinase;; U-box domain	Serine/threonine-protein kinase GN=PUB34 OS=Arabidopsis thaliana (Mouse-ear cress) PE=3 SV=1	T	Signal transduction mechanisms	PREDICTED: U-box domain-containing protein 34-like isoform X2 [Setaria italica]
Seita.1G033100	Seita.1G033100	0	0	0	0	0	0	0	0	0	0	0	0	--	--	--	--	--	Molecular Function: monooxygenase activity (GO:0004497);; Molecular Function: iron ion binding (GO:0005506);; Cellular Component: mitochondrion (GO:0005739);; Molecular Function: electron carrier activity (GO:0009055);; Cellular Component: chloroplast thylakoid membrane (GO:0009535);; Biological Process: response to wounding (GO:0009611);; Biological Process: response to fungus (GO:0009620);; Bio…	K01723|0|sita:101782604|allene oxide synthase 4-like; K01723 hydroperoxide dehydratase [EC:4.2.1.92] (A)	alpha-Linolenic acid metabolism (ko00592)	--	--	Cytochrome P450	Allene oxide synthase 4 OS=Oryza sativa subsp. japonica (Rice) PE=2 SV=1	Q	Secondary metabolites biosynthesis, transport and catabolism	PREDICTED: allene oxide synthase 4-like [Setaria italica]
Seita.1G033200	Seita.1G033200	0	0	0	0	0	0	0	0	0	0	0	0	--	--	--	--	--	Molecular Function: monooxygenase activity (GO:0004497);; Molecular Function: iron ion binding (GO:0005506);; Cellular Component: mitochondrion (GO:0005739);; Molecular Function: electron carrier activity (GO:0009055);; Cellular Component: chloroplast thylakoid membrane (GO:0009535);; Biological Process: response to wounding (GO:0009611);; Biological Process: response to fungus (GO:0009620);; Bio…	K01723|0|sita:101762057|allene oxide synthase 4-like; K01723 hydroperoxide dehydratase [EC:4.2.1.92] (A)	alpha-Linolenic acid metabolism (ko00592)	--	--	Cytochrome P450	Allene oxide synthase 4 OS=Oryza sativa subsp. japonica (Rice) PE=2 SV=1	Q	Secondary metabolites biosynthesis, transport and catabolism	PREDICTED: allene oxide synthase 4-like [Setaria italica]
Seita.1G033300	Seita.1G033300	0	0	0	0	0	0	0	0	0	0	0	0	--	--	--	--	--	--	--	--	--	--	--	--	--	--	--
Seita.1G033400	Seita.1G033400	8.06155	611	4.99303	517	5.17353	442	6.04077	465	6.03777	547	4.59453	370	0.996092	0.179062	normal	--	--	Molecular Function: structural constituent of ribosome (GO:0003735);; Cellular Component: mitochondrion (GO:0005739);; Cellular Component: ribosome (GO:0005840);; Biological Process: translation (GO:0006412);;	--	--	[O]	Posttranslational modification, protein turnover, chaperones	Ribosomal L18p/L5e family	--	O	Posttranslational modification, protein turnover, chaperones	PREDICTED: uncharacterized protein LOC101762475 isoform X1 [Setaria italica]
Seita.1G033500	Seita.1G033500	0	0	0.029006	2	0.010777	1	0	0	0	0	0	0	--	--	--	--	--	--	--	--	[Z]	Cytoskeleton	Interferon-related developmental regulator (IFRD)	--	Z	Cytoskeleton	PREDICTED: uncharacterized protein LOC101783013 [Setaria italica]
Seita.1G033600	Seita.1G033600	2.32971	254	0.561562	84	0.321666	41	1.00934	111	0.574927	78	0.272362	32	0.926559	0.698604	normal	[G]	Carbohydrate transport and metabolism	Molecular Function: beta-galactosidase activity (GO:0004565);; Biological Process: carbohydrate metabolic process (GO:0005975);; Cellular Component: plant-type cell wall (GO:0009505);; Cellular Component: plastid (GO:0009536);; Cellular Component: cytoplasmic membrane-bounded vesicle (GO:0016023);; Cellular Component: apoplast (GO:0048046);;	--	--	[G]	Carbohydrate transport and metabolism	Glycosyl hydrolases family 35;; Beta-galactosidase jelly roll domain;; Beta-galactosidase	Beta-galactosidase 4 (Precursor) OS=Oryza sativa subsp. japonica (Rice) PE=2 SV=1	G	Carbohydrate transport and metabolism	PREDICTED: LOW QUALITY PROTEIN: beta-galactosidase 4-like [Setaria italica]
Seita.1G033700	Seita.1G033700	0.546378	16	0.012863	2	0.47777	15	0.217395	7	0.060574	3	0.139604	4	--	--	--	--	--	--	--	--	--	--	--	--	G	Carbohydrate transport and metabolism	PREDICTED: uncharacterized protein LOC101783417 [Setaria italica]
Seita.1G033800	Seita.1G033800	11.4243	1322	3.79973	580	2.94347	384	7.86112	913	6.22999	865	4.02648	486	1	-0.0378271	normal	--	--	Cellular Component: plasma membrane (GO:0005886);; Biological Process: meristem structural organization (GO:0009933);; Biological Process: radial pattern formation (GO:0009956);; Biological Process: root morphogenesis (GO:0010015);; Biological Process: leaf vascular tissue pattern formation (GO:0010305);; Cellular Component: integral component of membrane (GO:0016021);; Cellular Component: cytopl…	--	--	--	--	Tetraspanin family	Tetraspanin-2 GN=TET2 OS=Arabidopsis thaliana (Mouse-ear cress) PE=2 SV=1	R	General function prediction only	PREDICTED: tetraspanin-2-like [Setaria italica]
Seita.1G033900	Seita.1G033900	0.62189	8	0.43369	7	0.327756	5	0.474229	6	0.161113	3	0.202455	3	--	--	--	--	--	Cellular Component: plasma membrane (GO:0005886);; Biological Process: meristem structural organization (GO:0009933);; Biological Process: radial pattern formation (GO:0009956);; Biological Process: root morphogenesis (GO:0010015);; Biological Process: leaf vascular tissue pattern formation (GO:0010305);; Cellular Component: integral component of membrane (GO:0016021);; Cellular Component: cytopl…	--	--	--	--	Tetraspanin family	Tetraspanin-2 GN=TET2 OS=Arabidopsis thaliana (Mouse-ear cress) PE=2 SV=1	R	General function prediction only	PREDICTED: tetraspanin-2-like [Setaria italica]
Seita.1G034000	Seita.1G034000	20.4705	769	3.29891	167	2.88178	125	11.5527	430	11.0311	484	12.462	490	0.97183	-0.491984	normal	--	--	Cellular Component: plasma membrane (GO:0005886);; Cellular Component: integral component of membrane (GO:0016021);;	--	--	--	--	Domain of unknown function (DUF588)	CASP-like protein 2D1 GN=Sb04g007720 OS=Sorghum bicolor (Sorghum) PE=2 SV=1	S	Function unknown	PREDICTED: CASP-like protein Sb04g007720-like [Setaria italica]
Seita.1G034100	Seita.1G034100	0	0	0	0	0	0	0	0	0	0	0	0	--	--	--	[C]	Energy production and conversion	Cellular Component: extracellular space (GO:0005615);; Molecular Function: UDP-N-acetylmuramate dehydrogenase activity (GO:0008762);; Biological Process: cytokinin metabolic process (GO:0009690);; Cellular Component: cytoplasmic membrane-bounded vesicle (GO:0016023);; Molecular Function: cytokinin dehydrogenase activity (GO:0019139);; Molecular Function: flavin adenine dinucleotide binding (GO:00…	K00279|0|sita:101764621|cytokinin dehydrogenase 7-like; K00279 cytokinin dehydrogenase [EC:1.5.99.12] (A)	Zeatin biosynthesis (ko00908)	[C]	Energy production and conversion	Cytokinin dehydrogenase 1, FAD and cytokinin binding;; FAD binding domain	Cytokinin dehydrogenase 7 (Precursor) OS=Oryza sativa subsp. japonica (Rice) PE=3 SV=1	C	Energy production and conversion	PREDICTED: cytokinin dehydrogenase 7-like [Setaria italica]
Seita.1G034200	Seita.1G034200	4.82958	317	2.74274	237	2.87059	213	6.38228	415	7.20014	553	5.54555	376	0.653694	-0.815077	normal	--	--	--	--	--	[K]	Transcription	GATA zinc finger	GATA transcription factor 21 GN=MPI10.2 OS=Arabidopsis thaliana (Mouse-ear cress) PE=1 SV=2	K	Transcription	PREDICTED: putative GATA transcription factor 22-like [Setaria italica]
Seita.1G034300	Seita.1G034300	29.1281	1927	26.7743	2334	25.4053	1893	32.6056	2164	28.5282	2266	29.0698	2003	1	-0.0632154	normal	[O]	Posttranslational modification, protein turnover, chaperones	Molecular Function: translation elongation factor activity (GO:0003746);; Molecular Function: copper ion binding (GO:0005507);; Cellular Component: cell wall (GO:0005618);; Cellular Component: vacuole (GO:0005773);; Cellular Component: eukaryotic translation elongation factor 1 complex (GO:0005853);; Cellular Component: plasma membrane (GO:0005886);; Biological Process: translational elongation (…	K03233|0|sita:101765436|elongation factor 1-gamma 2-like; K03233 elongation factor 1-gamma (A)	--	[O]	Posttranslational modification, protein turnover, chaperones	Elongation factor 1 gamma, conserved domain;; Glutathione S-transferase, N-terminal domain;; Glutathione S-transferase, N-terminal domain;; Glutathione S-transferase, C-terminal domain;; Glutathione S-transferase, N-terminal domain;; Glutathione S-transferase, C-terminal domain;; Glutathione S-transferase, C-terminal domain	Elongation factor 1-gamma 2 OS=Oryza sativa subsp. japonica (Rice) PE=2 SV=2	J	Translation, ribosomal structure and biogenesis	PREDICTED: elongation factor 1-gamma 2-like [Setaria italica]
Seita.1G034400	Seita.1G034400	10.4467	1470	25.4058	4604	26.6154	4064	17.52	2380	18.9319	3099	25.5863	3596	0.999228	0.194765	normal	[RTKL]	General function prediction only;; Signal transduction mechanisms;; Transcription;; Replication, recombination and repair	Molecular Function: protein serine/threonine kinase activity (GO:0004674);; Molecular Function: protein serine/threonine/tyrosine kinase activity (GO:0004712);; Molecular Function: ATP binding (GO:0005524);; Cellular Component: plasma membrane (GO:0005886);; Biological Process: protein phosphorylation (GO:0006468);;	K04424|0|sita:101765843|serine/threonine-protein kinase EDR1-like; K04424 sterile alpha motif and leucine zipper containing kinase AZK [EC:2.7.11.25] (A)	--	[T]	Signal transduction mechanisms	Protein tyrosine kinase;; Ethylene-responsive protein kinase Le-CTR1;; Protein kinase domain;; Phosphotransferase enzyme family	Serine/threonine-protein kinase EDR1 GN=F22O13.20 OS=Arabidopsis thaliana (Mouse-ear cress) PE=1 SV=1	T	Signal transduction mechanisms	PREDICTED: serine/threonine-protein kinase EDR1-like [Setaria italica]
Seita.1G034500	Seita.1G034500	7.3064	318	4.87256	279	5.61977	274	5.67061	217	6.05574	316	4.32597	197	0.993602	0.265667	normal	[BQ]	Chromatin structure and dynamics;; Secondary metabolites biosynthesis, transport and catabolism	Molecular Function: histone deacetylase activity (GO:0004407);; Cellular Component: plastid (GO:0009536);; Biological Process: histone deacetylation (GO:0016575);;	K11418|1.97056e-122|sbi:SORBI_04g007780|SORBIDRAFT_04g007780, Sb04g007780; hypothetical protein; K11418 histone deacetylase 11 [EC:3.5.1.98] (A)	--	[B]	Chromatin structure and dynamics	Histone deacetylase domain	Histone deacetylase 2 GN=HDA2 OS=Arabidopsis thaliana (Mouse-ear cress) PE=2 SV=2	1114		hypothetical protein SORBIDRAFT_04g007780 [Sorghum bicolor]
Seita.1G034600	Seita.1G034600	1.12699	108	4.8753	563	5.22722	521	3.87656	343	3.67833	382	8.38666	754	0.992882	-0.279249	normal	--	--	Cellular Component: nucleus (GO:0005634);; Cellular Component: mitochondrion (GO:0005739);;	--	--	--	--	Helix-loop-helix DNA-binding domain	Putative transcription factor bHLH041 GN=MHM17.7 OS=Arabidopsis thaliana (Mouse-ear cress) PE=3 SV=1	S	Function unknown	PREDICTED: putative transcription factor bHLH041-like [Setaria italica]
Seita.1G034700	Seita.1G034700	9.05281	724	8.01176	844	7.79811	703	9.29349	746	8.85482	850	8.98151	748	1	-0.0434076	normal	[C]	Energy production and conversion	Molecular Function: ATP binding (GO:0005524);; Cellular Component: vacuolar membrane (GO:0005774);; Cellular Component: Golgi apparatus (GO:0005794);; Cellular Component: plasma membrane (GO:0005886);; Biological Process: gluconeogenesis (GO:0006094);; Biological Process: pentose-phosphate shunt (GO:0006098);; Biological Process: response to salt stress (GO:0009651);; Cellular Component: chloropl…	K02147|0|sita:101767078|V-type proton ATPase subunit B 2-like; K02147 V-type H+-transporting ATPase subunit B (A)	Oxidative phosphorylation (ko00190);; Phagosome (ko04145)	[C]	Energy production and conversion	ATP synthase alpha/beta family, nucleotide-binding domain;; ATP synthase alpha/beta chain, C terminal domain;; ATP synthase alpha/beta family, beta-barrel domain	V-type proton ATPase subunit B 2 OS=Hordeum vulgare (Barley) PE=2 SV=1	C	Energy production and conversion	PREDICTED: V-type proton ATPase subunit B 2-like isoform X1 [Setaria italica]
Seita.1G034800	Seita.1G034800	0	0	0	0	0	0	0	0	0	0	0	0	--	--	--	[LKJ]	Replication, recombination and repair;; Transcription;; Translation, ribosomal structure and biogenesis	Molecular Function: nucleic acid binding (GO:0003676);; Molecular Function: hydrolase activity (GO:0016787);;	K03257|0|sita:101784627|uncharacterized LOC101784627; K03257 translation initiation factor 4A (A)	RNA transport (ko03013)	[J]	Translation, ribosomal structure and biogenesis	Helicase conserved C-terminal domain	Putative eukaryotic initiation factor 4A-2 OS=Oryza sativa subsp. japonica (Rice) PE=3 SV=2	J	Translation, ribosomal structure and biogenesis	PREDICTED: uncharacterized protein LOC101784627 [Setaria italica]
Seita.1G034900	Seita.1G034900	0.164275	8	9.38536	603	12.3044	675	2.62651	129	2.11752	124	3.63665	185	0.726145	1.61665	normal	--	--	--	--	--	--	--	Cotton fibre expressed protein;; Domain of unknown function (DUF4408)	--	S	Function unknown	PREDICTED: uncharacterized protein LOC105047980 [Elaeis guineensis]
Seita.1G035000	Seita.1G035000	48.0657	3229	24.9805	2240	28.7642	2215	29.3533	2027	28.1613	2300	32.8013	2350	0.993235	0.185339	normal	[R]	General function prediction only	Molecular Function: nucleotide binding (GO:0000166);; Molecular Function: RNA binding (GO:0003723);; Cellular Component: ribonucleoprotein complex (GO:0030529);;	K12741|1.12807e-130|sita:101770183|heterogeneous nuclear ribonucleoprotein 1-like; K12741 heterogeneous nuclear ribonucleoprotein A1/A3 (A)	Spliceosome (ko03040)	[R]	General function prediction only	RNA recognition motif. (a.k.a. RRM, RBD, or RNP domain);; RNA recognition motif (a.k.a. RRM, RBD, or RNP domain);; RNA recognition motif. (a.k.a. RRM, RBD, or RNP domain)	Heterogeneous nuclear ribonucleoprotein 1 GN=RNP1 OS=Arabidopsis thaliana (Mouse-ear cress) PE=1 SV=1	A	RNA processing and modification	PREDICTED: heterogeneous nuclear ribonucleoprotein 1-like [Setaria italica]
Seita.1G035100	Seita.1G035100	9.5639	813	4.79759	538	4.76724	457	8.81786	752	7.04589	720	7.9434	704	0.979484	-0.297118	normal	--	--	Molecular Function: calcium ion binding (GO:0005509);; Cellular Component: plasma membrane (GO:0005886);; Cellular Component: intracellular membrane-bounded organelle (GO:0043231);; Cellular Component: cytoplasmic part (GO:0044444);; Biological Process: single-organism cellular process (GO:0044763);; Biological Process: regulation of biological process (GO:0050789);;	--	--	[TU]	Signal transduction mechanisms;; Intracellular trafficking, secretion, and vesicular transport	EF-hand domain pair;; EF hand;; EF-hand domain;; EF hand;; EF-hand domain pair;; Secreted protein acidic and rich in cysteine Ca binding region	Calmodulin-like protein 10 GN=CML10 OS=Arabidopsis thaliana (Mouse-ear cress) PE=2 SV=1	1589		PREDICTED: reticulocalbin-1-like isoform X1 [Setaria italica]
Seita.1G035200	Seita.1G035200	9.97188	1136	13.4663	1939	9.37272	1146	16.0309	1751	12.879	1726	21.6065	2438	0.848361	-0.499581	normal	[Q]	Secondary metabolites biosynthesis, transport and catabolism	Molecular Function: monooxygenase activity (GO:0004497);; Molecular Function: iron ion binding (GO:0005506);; Molecular Function: electron carrier activity (GO:0009055);; Molecular Function: oxidoreductase activity, acting on paired donors, with incorporation or reduction of molecular oxygen (GO:0016705);; Molecular Function: heme binding (GO:0020037);; Biological Process: oxidation-reduction pro…	--	--	[Q]	Secondary metabolites biosynthesis, transport and catabolism	Cytochrome P450	Cytochrome P450 711A1 OS=Arabidopsis thaliana (Mouse-ear cress) PE=2 SV=1	Q	Secondary metabolites biosynthesis, transport and catabolism	PREDICTED: cytochrome P450 711A1-like isoform X1 [Setaria italica]
Seita.1G035300	Seita.1G035300	4.29187	374	1.86712	215	2.09543	206	4.42079	387	3.89946	408	6.14041	557	0.698594	-0.80318	normal	[E]	Amino acid transport and metabolism	Molecular Function: cysteine synthase activity (GO:0004124);; Biological Process: cysteine biosynthetic process from serine (GO:0006535);;	K01738|0|sita:101767749|cysteine synthase-like; K01738 cysteine synthase A [EC:2.5.1.47] (A)	Cysteine and methionine metabolism (ko00270);; Sulfur metabolism (ko00920);; Carbon metabolism (ko01200);; Biosynthesis of amino acids (ko01230)	[E]	Amino acid transport and metabolism	Pyridoxal-phosphate dependent enzyme	Cysteine synthase OS=Spinacia oleracea (Spinach) PE=1 SV=1	E	Amino acid transport and metabolism	PREDICTED: cysteine synthase-like [Setaria italica]
Seita.1G035400	Seita.1G035400	39.3707	1317	4.34083	192	13.5425	510	26.3015	883	23.7216	952	78.8709	2747	0.789879	-1.26091	normal	--	--	Cellular Component: membrane (GO:0016020);;	--	--	--	--	--	--	S	Function unknown	PREDICTED: uncharacterized protein LOC101770571 [Setaria italica]
Seita.1G035500	Seita.1G035500	1.9623	56	0.053627	3	0.282346	10	0.170892	5	0.382437	13	0.608927	18	--	--	--	--	--	Cellular Component: membrane (GO:0016020);;	--	--	--	--	--	--	S	Function unknown	PREDICTED: uncharacterized protein LOC101770981 [Setaria italica]
Seita.1G035600	Seita.1G035600	0	0	0	0	0	0	0	0	0	0	0	0	--	--	--	--	--	--	--	--	--	--	--	--	Q	Secondary metabolites biosynthesis, transport and catabolism	PREDICTED: uncharacterized protein LOC101778942 [Setaria italica]
Seita.1G035700	Seita.1G035700	15.8841	5144	18.9259	6493	21.0532	6264	18.7487	4726	19.9713	6486	27.0309	8038	0.999357	-0.0967936	normal	--	--	Cellular Component: membrane (GO:0016020);;	--	--	--	--	--	--	S	Function unknown	PREDICTED: uncharacterized protein LOC101771377 isoform X1 [Setaria italica]
Seita.1G035800	Seita.1G035800	5.1929	196	1.50259	75	1.30566	56	2.87015	109	2.49973	114	4.39901	173	0.993602	-0.348885	normal	--	--	--	--	--	--	--	--	--	--	--	--
Seita.1G035900	Seita.1G035900	5.58815	183	5.59036	241	2.86933	106	6.45885	212	3.51491	138	7.44427	254	0.999228	-0.235359	normal	--	--	Cellular Component: membrane (GO:0016020);;	--	--	--	--	--	--	S	Function unknown	PREDICTED: uncharacterized protein LOC101772317 isoform X1 [Setaria italica]
Seita.1G036000	Seita.1G036000	28.2303	5158	7.48556	1692	9.87045	1926	12.06	2022	13.627	2653	21.8034	3889	1	-0.022684	normal	--	--	--	--	--	--	--	WRKY DNA -binding domain	Probable WRKY transcription factor 70 GN=WRKY70 OS=Arabidopsis thaliana (Mouse-ear cress) PE=2 SV=1	R	General function prediction only	PREDICTED: probable WRKY transcription factor 70-like [Setaria italica]
Seita.1G036100	Seita.1G036100	0.116143	4	0	0	0.04497	2	0	0	0	0	0.192765	7	--	--	--	--	--	Cellular Component: membrane (GO:0016020);;	--	--	--	--	--	--	S	Function unknown	PREDICTED: uncharacterized protein LOC101773541 [Setaria italica]
Seita.1G036200	Seita.1G036200	0.031813	3	0	0	0.027114	2	0.031701	3	0.102799	8	0.030434	2	--	--	--	--	--	Molecular Function: ATP binding (GO:0005524);; Cellular Component: nucleus (GO:0005634);; Cellular Component: vacuole (GO:0005773);; Cellular Component: plasma membrane (GO:0005886);; Biological Process: ATP catabolic process (GO:0006200);; Biological Process: ATP biosynthetic process (GO:0006754);; Biological Process: cation transport (GO:0006812);; Biological Process: hydrogen transport (GO:000…	K01535|9.40399e-49|sita:101753985|ATPase 8, plasma membrane-type-like; K01535 H+-transporting ATPase [EC:3.6.3.6] (A)	Oxidative phosphorylation (ko00190)	[P]	Inorganic ion transport and metabolism	--	Plasma membrane ATPase OS=Triticum aestivum (Wheat) PE=2 SV=1	P	Inorganic ion transport and metabolism	PREDICTED: ATPase 8, plasma membrane-type-like [Setaria italica]
Seita.1G036300	Seita.1G036300	0.021659	2	0	0	0	0	0	0	0	0	0	0	--	--	--	[RTKL]	General function prediction only;; Signal transduction mechanisms;; Transcription;; Replication, recombination and repair	Molecular Function: nucleotide binding (GO:0000166);; Molecular Function: protein kinase activity (GO:0004672);; Cellular Component: membrane (GO:0016020);; Cellular Component: cytoplasmic membrane-bounded vesicle (GO:0016023);;	--	--	--	--	Protein kinase domain;; Protein tyrosine kinase;; Leucine rich repeat;; Leucine Rich repeats (2 copies);; Leucine Rich Repeat	Probable LRR receptor-like serine/threonine-protein kinase At3g47570 (Precursor) GN=At3g47570 OS=Arabidopsis thaliana (Mouse-ear cress) PE=2 SV=1	T	Signal transduction mechanisms	putative protein kinase Xa21 [Oryza sativa Japonica Group]
Seita.1G036400	Seita.1G036400	2.00997	20	0.062147	1	1.21104	14	1.22183	12	1.56199	19	3.67037	38	--	--	--	--	--	--	--	--	--	--	--	--	--	--	--
Seita.1G036500	Seita.1G036500	1.13886	38	0.217851	10	0.795937	31	0.798172	27	1.22968	50	2.19746	77	0.655535	-0.972365	normal	--	--	--	--	--	--	--	--	--	--	--	--
Seita.1G036600	Seita.1G036600	0	0	0	0	0	0	0	0	0	0	0.026487	3	--	--	--	[RTKL]	General function prediction only;; Signal transduction mechanisms;; Transcription;; Replication, recombination and repair	Cellular Component: cytoplasmic membrane-bounded vesicle (GO:0016023);; Molecular Function: transferase activity, transferring phosphorus-containing groups (GO:0016772);;	--	--	--	--	Protein tyrosine kinase;; Protein kinase domain;; Leucine Rich repeats (2 copies);; Leucine rich repeat N-terminal domain;; Leucine rich repeat;; Leucine Rich Repeat;; Leucine Rich repeat	Probable LRR receptor-like serine/threonine-protein kinase At3g47570 (Precursor) GN=At3g47570 OS=Arabidopsis thaliana (Mouse-ear cress) PE=2 SV=1	T	Signal transduction mechanisms	putative protein kinase Xa21 [Oryza sativa Japonica Group]
Seita.1G036700	Seita.1G036700	6.47567	257	1.44473	76	2.09698	94	3.57813	143	3.53242	169	3.04496	126	1	-0.0810048	normal	--	--	Cellular Component: membrane (GO:0016020);;	--	--	--	--	--	--	S	Function unknown	PREDICTED: uncharacterized protein LOC101773541 [Setaria italica]
Seita.1G036800	Seita.1G036800	0	0	0	0	0	0	0	0	0	0	0	0	--	--	--	[RTKL]	General function prediction only;; Signal transduction mechanisms;; Transcription;; Replication, recombination and repair	Molecular Function: nucleotide binding (GO:0000166);; Molecular Function: protein kinase activity (GO:0004672);; Cellular Component: membrane (GO:0016020);; Cellular Component: cytoplasmic membrane-bounded vesicle (GO:0016023);;	--	--	--	--	Leucine Rich repeats (2 copies);; Leucine rich repeat;; Protein kinase domain;; Protein tyrosine kinase;; Leucine Rich Repeat;; Leucine rich repeat N-terminal domain;; Leucine Rich repeat;; Leucine rich repeat	Probable LRR receptor-like serine/threonine-protein kinase At3g47570 (Precursor) GN=At3g47570 OS=Arabidopsis thaliana (Mouse-ear cress) PE=2 SV=1	T	Signal transduction mechanisms	PREDICTED: putative receptor-like protein kinase At3g47110-like [Setaria italica]
Seita.1G036900	Seita.1G036900	0	0	0	0	0	0	0	0	0	0	0	0	--	--	--	--	--	Biological Process: phosphorelay signal transduction system (GO:0000160);; Molecular Function: signal transducer activity (GO:0004871);; Biological Process: cellular metabolic process (GO:0044237);;	K14509|0|zma:103654807|protein EIN4-like; K14509 ethylene receptor [EC:2.7.13.-] (A)	Plant hormone signal transduction (ko04075)	[T]	Signal transduction mechanisms	--	Protein EIN4 GN=EIN4 OS=Arabidopsis thaliana (Mouse-ear cress) PE=1 SV=1	T	Signal transduction mechanisms	PREDICTED: protein EIN4-like [Zea mays]
Seita.1G037000	Seita.1G037000	0.632826	106	0.146304	33	0.143762	27	0.313653	53	0.465517	93	0.342652	60	0.991389	-0.359954	normal	[RTKL]	General function prediction only;; Signal transduction mechanisms;; Transcription;; Replication, recombination and repair	Molecular Function: protein serine/threonine kinase activity (GO:0004674);; Molecular Function: ATP binding (GO:0005524);; Biological Process: protein phosphorylation (GO:0006468);; Cellular Component: integral component of membrane (GO:0016021);; Cellular Component: cytoplasmic membrane-bounded vesicle (GO:0016023);;	--	--	--	--	Leucine Rich repeats (2 copies);; Leucine rich repeat;; Protein tyrosine kinase;; Protein kinase domain;; Leucine Rich Repeat;; Leucine rich repeat N-terminal domain;; Leucine Rich repeat;; Leucine rich repeat	Probable LRR receptor-like serine/threonine-protein kinase At3g47570 (Precursor) GN=At3g47570 OS=Arabidopsis thaliana (Mouse-ear cress) PE=2 SV=1	T	Signal transduction mechanisms	PREDICTED: probable LRR receptor-like serine/threonine-protein kinase At3g47570-like [Setaria italica]
Seita.1G037100	Seita.1G037100	0	0	0	0	0	0	0	0	0	0	0	0	--	--	--	--	--	--	--	--	--	--	--	--	--	--	--
Seita.1G037200	Seita.1G037200	3.55456	199	1.62133	122	2.26689	164	2.5129	162	2.47127	180	2.60296	174	1	-0.0949795	normal	--	--	--	--	--	--	--	--	--	--	--	--
Seita.1G037300	Seita.1G037300	0.162539	23	0.083021	15	0.213414	33	0.15902	22	0.176773	30	0.158921	23	--	--	--	[RTKL]	General function prediction only;; Signal transduction mechanisms;; Transcription;; Replication, recombination and repair	Molecular Function: protein serine/threonine kinase activity (GO:0004674);; Molecular Function: ATP binding (GO:0005524);; Biological Process: protein phosphorylation (GO:0006468);; Cellular Component: integral component of membrane (GO:0016021);; Cellular Component: cytoplasmic membrane-bounded vesicle (GO:0016023);;	--	--	--	--	Protein tyrosine kinase;; Leucine rich repeat;; Protein kinase domain;; Leucine Rich repeats (2 copies);; Leucine Rich Repeat;; Leucine rich repeat N-terminal domain;; Leucine Rich repeat	Probable LRR receptor-like serine/threonine-protein kinase At3g47570 (Precursor) GN=At3g47570 OS=Arabidopsis thaliana (Mouse-ear cress) PE=2 SV=1	S	Function unknown	PREDICTED: probable LRR receptor-like serine/threonine-protein kinase At3g47570-like [Setaria italica]
Seita.1G037400	Seita.1G037400	6.12697	457	5.462	543	6.38856	482	9.16836	595	7.28849	587	8.82949	595	0.981967	-0.261353	normal	[F]	Nucleotide transport and metabolism	Molecular Function: calmodulin binding (GO:0005516);; Biological Process: tRNA modification (GO:0006400);; Biological Process: meristem structural organization (GO:0009933);; Cellular Component: cytoplasmic membrane-bounded vesicle (GO:0016023);; Molecular Function: purine nucleotide binding (GO:0017076);; Biological Process: leaf development (GO:0048366);; Biological Process: 5-carbamoylmethylur…	K15456|0|sita:101774349|protein KTI12 homolog; K15456 protein KTI12 (A)	--	[R]	General function prediction only	Chromatin associated protein KTI12;; AAA domain	--	R	General function prediction only	PREDICTED: protein KTI12 homolog [Setaria italica]
Seita.1G037500	Seita.1G037500	0.018181	1	0.273947	7	0.512899	11	0.003327	1	0.025961	1	0.21333	4	--	--	--	--	--	--	--	--	--	--	--	--	--	--	--
Seita.1G037600	Seita.1G037600	0	0	0	0	0	0	0	0	0	0	0	0	--	--	--	--	--	--	--	--	--	--	--	--	--	--	--
Seita.1G037700	Seita.1G037700	31.2829	2322	51.6563	5053	48.5081	4055	46.9856	3500	42.0354	3746	40.1921	3108	0.999228	0.166892	normal	[BQ]	Chromatin structure and dynamics;; Secondary metabolites biosynthesis, transport and catabolism	Cellular Component: nucleus (GO:0005634);; Biological Process: regulation of transcription, DNA-templated (GO:0006355);; Biological Process: DNA mediated transformation (GO:0009294);; Biological Process: jasmonic acid and ethylene-dependent systemic resistance (GO:0009861);; Biological Process: histone acetylation (GO:0016573);; Molecular Function: NAD-dependent histone deacetylase activity (H3-K…	K06067|0|zma:541931|hda101; histone deacetylase HDA101; K06067 histone deacetylase 1/2 [EC:3.5.1.98] (A)	--	[B]	Chromatin structure and dynamics	Histone deacetylase domain	Probable histone deacetylase 19 OS=Zea mays (Maize) PE=2 SV=1	B	Chromatin structure and dynamics	histone deacetylase HDA101 [Zea mays]
Seita.1G037800	Seita.1G037800	6.72727	949	11.3369	2129	11.6076	1830	6.473	1041	6.43135	1221	8.46168	1245	0.857242	0.510701	normal	--	--	Cellular Component: nucleus (GO:0005634);;	K17602|0|sita:101775160|uncharacterized LOC101775160; K17602 YLP motif-containing protein 1 (A)	--	[V]	Defense mechanisms	AAA domain	--	V	Defense mechanisms	PREDICTED: uncharacterized protein LOC101775160 [Setaria italica]
Seita.1G037900	Seita.1G037900	0.632689	19	4.72535	183	0.363219	12	0.430942	13	0.232877	9	2.73354	84	--	--	--	[GEPR]	Carbohydrate transport and metabolism;; Amino acid transport and metabolism;; Inorganic ion transport and metabolism;; General function prediction only	Cellular Component: vacuole (GO:0005773);; Cellular Component: integral component of plasma membrane (GO:0005887);; Biological Process: sucrose metabolic process (GO:0005985);; Molecular Function: sucrose:proton symporter activity (GO:0008506);; Biological Process: sucrose transport (GO:0015770);; Biological Process: carbohydrate transmembrane transport (GO:0034219);;	--	--	[G]	Carbohydrate transport and metabolism	--	Sucrose transport protein SUT2 GN=SUT2 OS=Oryza sativa subsp. indica (Rice) PE=2 SV=2	G	Carbohydrate transport and metabolism	PREDICTED: sucrose transport protein SUT2-like [Setaria italica]
Seita.1G038000	Seita.1G038000	0	0	0.242187	17	0.068897	4	0.059219	3	0.11602	8	0.076397	5	--	--	--	--	--	Cellular Component: cytoplasmic membrane-bounded vesicle (GO:0016023);; Molecular Function: pectate lyase activity (GO:0030570);;	K01728|0|sita:101775972|pectate lyase-like; K01728 pectate lyase [EC:4.2.2.2] (A)	Pentose and glucuronate interconversions (ko00040)	--	--	Pectate lyase;; Pectate lyase, N terminus;; Right handed beta helix region	Pectate lyase (Precursor) OS=Lilium longiflorum (Trumpet lily) PE=2 SV=1	R	General function prediction only	PREDICTED: pectate lyase-like [Setaria italica]
Seita.1G038100	Seita.1G038100	3.07831	195	0.323428	28	0.68562	39	0.710605	47	0.930121	73	0.740863	51	0.974894	0.546825	normal	[R]	General function prediction only	Biological Process: mRNA splicing, via spliceosome (GO:0000398);; Biological Process: production of siRNA involved in RNA interference (GO:0030422);; Biological Process: production of miRNAs involved in gene silencing by miRNA (GO:0035196);; Biological Process: tRNA 3'-end processing (GO:0042780);; Molecular Function: 3'-tRNA processing endoribonuclease activity (GO:0042781);; Biological Process:…	K00784|0|sita:101776377|nuclear ribonuclease Z-like; K00784 ribonuclease Z [EC:3.1.26.11] (A)	RNA transport (ko03013)	--	--	Beta-lactamase superfamily domain;; Metallo-beta-lactamase superfamily	Nuclear ribonuclease Z GN=NUZ OS=Arabidopsis thaliana (Mouse-ear cress) PE=2 SV=3	S	Function unknown	PREDICTED: nuclear ribonuclease Z-like [Setaria italica]
Seita.1G038200	Seita.1G038200	17.6751	2129	14.7906	2347	15.5691	2114	17.8145	2152	16.6578	2407	17.8288	2237	1	-0.0421222	normal	--	--	Molecular Function: GTPase activity (GO:0003924);; Molecular Function: GTP binding (GO:0005525);; Cellular Component: endoplasmic reticulum membrane (GO:0005789);; Cellular Component: plasma membrane (GO:0005886);; Biological Process: GTP catabolic process (GO:0006184);; Biological Process: ER to Golgi vesicle-mediated transport (GO:0006888);; Biological Process: plant-type cell wall biogenesis (…	--	--	[R]	General function prediction only	Root hair defective 3 GTP-binding protein (RHD3);; Guanylate-binding protein, N-terminal domain	Protein ROOT HAIR DEFECTIVE 3 {ECO:0000255|HAMAP-Rule:MF_03109} GN=B1112D09.4 OS=Oryza sativa subsp. japonica (Rice) PE=2 SV=1	R	General function prediction only	PREDICTED: protein ROOT HAIR DEFECTIVE 3-like [Setaria italica]
Seita.1G038300	Seita.1G038300	21.4359	869	5.53617	296	4.10041	188	0.093183	4	0.284828	14	0.420981	18	0.00654356	5.16494	up	--	--	--	--	--	--	--	--	--	--	--	PREDICTED: leucine-rich repeat extensin-like protein 3-like [Setaria italica]
Seita.1G038400	Seita.1G038400	4.84276	391	8.6131	535	7.78846	482	1.27714	103	65.4312	3583	9.64818	571	0.899367	-1.49284	normal	--	--	--	--	--	--	--	--	--	--	--	--
Seita.1G038500	Seita.1G038500	0	0	0.02906	3	0	0	0	0	0	0	0	0	--	--	--	[RTKL]	General function prediction only;; Signal transduction mechanisms;; Transcription;; Replication, recombination and repair	Molecular Function: protein serine/threonine kinase activity (GO:0004674);; Molecular Function: ATP binding (GO:0005524);; Biological Process: protein phosphorylation (GO:0006468);; Cellular Component: plastid (GO:0009536);; Cellular Component: integral component of membrane (GO:0016021);; Cellular Component: cytoplasmic membrane-bounded vesicle (GO:0016023);;	--	--	--	--	Protein kinase domain;; Protein tyrosine kinase;; Leucine rich repeat;; Leucine Rich repeats (2 copies);; Leucine Rich Repeat	Probable LRR receptor-like serine/threonine-protein kinase At3g47570 (Precursor) GN=At3g47570 OS=Arabidopsis thaliana (Mouse-ear cress) PE=2 SV=1	S	Function unknown	PREDICTED: probable LRR receptor-like serine/threonine-protein kinase At3g47570-like [Setaria italica]
Seita.1G038600	Seita.1G038600	0.936735	52	0.077545	6	0	0	0	0	0	0	0	0	--	--	--	--	--	--	--	--	--	--	--	--	--	--	--
Seita.1G038700	Seita.1G038700	0.013461	1	0.023697	3	0.393678	26	0.046456	3	0.051778	4	0.071531	4	--	--	--	--	--	--	--	--	--	--	--	--	--	--	--
Seita.1G038800	Seita.1G038800	0	0	0	0	0	0	0	0	0	0	0	0	--	--	--	--	--	--	--	--	--	--	--	--	--	--	--
Seita.1G038900	Seita.1G038900	2.55189	37	0.613084	12	0.587265	10	0.061507	1	0.217686	4	0.527031	8	--	--	--	--	--	--	--	--	--	--	--	--	--	--	--
Seita.1G039000	Seita.1G039000	0	0	0	0	0.034839	2	0	0	0	0	0	0	--	--	--	--	--	--	--	--	--	--	--	--	--	--	--
Seita.1G039100	Seita.1G039100	0	0	0	0	0	0	0	0	0	0	0	0	--	--	--	--	--	--	--	--	--	--	--	--	--	--	--
Seita.1G039200	Seita.1G039200	0.857105	79	1.16543	120	0.671307	60	0.393001	36	0.442756	43	0.143347	18	0.26581	1.42157	normal	[V]	Defense mechanisms	Molecular Function: nucleotide binding (GO:0000166);; Cellular Component: membrane (GO:0016020);; Molecular Function: nucleoside-triphosphatase activity (GO:0017111);;	--	--	[IR]	Lipid transport and metabolism;; General function prediction only	ABC transporter;; ABC-2 family transporter protein;; AAA domain	ABC transporter A family member 8 GN=T23J7.120 OS=Arabidopsis thaliana (Mouse-ear cress) PE=2 SV=3	Q	Secondary metabolites biosynthesis, transport and catabolism	PREDICTED: ABC transporter A family member 7-like [Setaria italica]
Seita.1G039300	Seita.1G039300	0	0	0	0	0	0	0	0	0	0	0	0	--	--	--	[V]	Defense mechanisms	Molecular Function: ATP binding (GO:0005524);; Biological Process: ATP catabolic process (GO:0006200);; Cellular Component: membrane (GO:0016020);; Molecular Function: ATPase activity (GO:0016887);;	--	--	[IR]	Lipid transport and metabolism;; General function prediction only	ABC transporter;; ABC-2 family transporter protein;; AAA domain	ABC transporter A family member 8 GN=T23J7.120 OS=Arabidopsis thaliana (Mouse-ear cress) PE=2 SV=3	Q	Secondary metabolites biosynthesis, transport and catabolism	PREDICTED: ABC transporter A family member 7-like [Setaria italica]
Seita.1G039400	Seita.1G039400	6.51814	687	5.79564	963	4.74374	692	6.8393	831	6.04383	920	9.51617	1210	0.947762	-0.345974	normal	[V]	Defense mechanisms	Molecular Function: ATP binding (GO:0005524);; Biological Process: ATP catabolic process (GO:0006200);; Cellular Component: membrane (GO:0016020);; Molecular Function: ATPase activity (GO:0016887);;	--	--	[IR]	Lipid transport and metabolism;; General function prediction only	ABC transporter;; AAA domain;; ABC-2 family transporter protein	ABC transporter A family member 8 GN=T23J7.120 OS=Arabidopsis thaliana (Mouse-ear cress) PE=2 SV=3	Q	Secondary metabolites biosynthesis, transport and catabolism	PREDICTED: ABC transporter A family member 10-like [Setaria italica]
Seita.1G039500	Seita.1G039500	0.035488	1	0.000569	1	0.000551	1	0.261529	8	0.001088	1	0.001249	1	--	--	--	--	--	Biological Process: root hair cell differentiation (GO:0048765);;	--	--	--	--	--	--	S	Function unknown	PREDICTED: uncharacterized protein LOC101759378 [Setaria italica]
Seita.1G039600	Seita.1G039600	2.57818	268	2.73728	361	2.39032	278	3.58352	389	3.12547	381	3.17461	346	0.981764	-0.298485	normal	--	--	Biological Process: metabolic process (GO:0008152);; Molecular Function: transferase activity, transferring hexosyl groups (GO:0016758);;	--	--	[GC]	Carbohydrate transport and metabolism;; Energy production and conversion	--	Sterol 3-beta-glucosyltransferase UGT80B1 GN=T10P12.7 OS=Arabidopsis thaliana (Mouse-ear cress) PE=2 SV=1	S	Function unknown	PREDICTED: sterol 3-beta-glucosyltransferase UGT80B1-like isoform X1 [Setaria italica]
Seita.1G039700	Seita.1G039700	0	0	0	0	0.030968	2	0.198879	10	0.049763	3	0.039018	2	--	--	--	--	--	Molecular Function: SNAP receptor activity (GO:0005484);; Cellular Component: plasma membrane (GO:0005886);; Biological Process: intracellular protein transport (GO:0006886);; Biological Process: pollen tube growth (GO:0009860);; Biological Process: vesicle-mediated transport (GO:0016192);; Cellular Component: transport vesicle (GO:0030133);;	K08486|9.50489e-136|sbi:SORBI_04g007360|SORBIDRAFT_04g007360, Sb04g007360; hypothetical protein; K08486 syntaxin 1B/2/3 (A)	SNARE interactions in vesicular transport (ko04130)	[U]	Intracellular trafficking, secretion, and vesicular transport	SNARE domain;; Syntaxin	Syntaxin-124 GN=SYP124 OS=Arabidopsis thaliana (Mouse-ear cress) PE=2 SV=1	U	Intracellular trafficking, secretion, and vesicular transport	hypothetical protein SORBIDRAFT_04g007360 [Sorghum bicolor]
Seita.1G039800	Seita.1G039800	0	0	0	0	0	0	0	0	0.034962	2	0	0	--	--	--	--	--	--	--	--	--	--	--	--	R	General function prediction only	PREDICTED: uncharacterized protein LOC101759784 [Setaria italica]
Seita.1G039900	Seita.1G039900	6.57898	135	2.48787	68	3.87225	90	2.37743	49	1.70144	42	1.43343	31	0.400493	1.24655	normal	--	--	Cellular Component: chloroplast (GO:0009507);;	--	--	--	--	Domain of unknown function (DUF4516)	--	S	Function unknown	PREDICTED: uncharacterized protein LOC101779756 [Setaria italica]
Seita.1G040000	Seita.1G040000	1.5569	53	0.178956	9	0.704388	27	2.78637	95	2.1972	90	3.45947	123	0.0938236	-1.83595	normal	--	--	--	--	--	--	--	--	--	S	Function unknown	PREDICTED: uncharacterized protein LOC101760602 [Setaria italica]
Seita.1G040100	Seita.1G040100	2.91838	112	0.429785	22	1.63075	71	4.09014	158	3.11488	144	4.34244	174	0.444059	-1.24384	normal	--	--	--	--	--	--	--	Protein of unknown function (DUF1070)	--	--	--	PREDICTED: uncharacterized protein LOC101780162 [Setaria italica]
Seita.1G040200	Seita.1G040200	18.8967	2546	17.6273	3131	17.2958	2622	20.3729	2755	18.5048	2996	24.0553	3379	0.999228	-0.13947	normal	[R]	General function prediction only	Molecular Function: structural molecule activity (GO:0005198);; Biological Process: intracellular protein transport (GO:0006886);; Biological Process: vesicle-mediated transport (GO:0016192);; Cellular Component: membrane coat (GO:0030117);; Cellular Component: COPI-coated vesicle membrane (GO:0030663);;	K17302|0|sita:101780561|coatomer subunit beta'-2-like; K17302 coatomer, subunit beta' (A)	--	[U]	Intracellular trafficking, secretion, and vesicular transport	Coatomer WD associated region;; WD domain, G-beta repeat	Coatomer subunit beta&apos;-2 GN=OJ1006_A02.24 OS=Oryza sativa subsp. japonica (Rice) PE=2 SV=1	U	Intracellular trafficking, secretion, and vesicular transport	PREDICTED: coatomer subunit beta&apos;-2-like isoform X1 [Setaria italica]
Seita.1G040300	Seita.1G040300	7.77979	862	6.5916	965	5.40583	679	6.8462	763	5.47791	731	8.21369	951	1	0.0154046	normal	[U]	Intracellular trafficking, secretion, and vesicular transport	Molecular Function: ARF GTPase activator activity (GO:0008060);; Molecular Function: zinc ion binding (GO:0008270);; Biological Process: regulation of ARF GTPase activity (GO:0032312);;	--	--	[T]	Signal transduction mechanisms	Putative GTPase activating protein for Arf	Probable ADP-ribosylation factor GTPase-activating protein AGD14 GN=At1g08680/At1g08690 OS=Arabidopsis thaliana (Mouse-ear cress) PE=1 SV=2	T	Signal transduction mechanisms	PREDICTED: probable ADP-ribosylation factor GTPase-activating protein AGD14-like [Setaria italica]
Seita.1G040400	Seita.1G040400	0.16361	7	0.10815	6	0.029136	2	0.0891	4	0.089798	5	0.291259	13	--	--	--	--	--	--	--	--	[R]	General function prediction only	Kelch motif;; Kelch motif;; Galactose oxidase, central domain;; Galactose oxidase, central domain;; Kelch motif;; F-box domain	F-box/kelch-repeat protein At1g80440 GN=At1g80440 OS=Arabidopsis thaliana (Mouse-ear cress) PE=2 SV=1	R	General function prediction only	PREDICTED: F-box/kelch-repeat protein At1g80440-like [Setaria italica]
Seita.1G040500	Seita.1G040500	18.4594	2655	15.9826	3042	14.2968	2325	21.6079	3128	19.1438	3317	20.4787	3072	0.981764	-0.252066	normal	--	--	Molecular Function: NAD+ ADP-ribosyltransferase activity (GO:0003950);;	--	--	--	--	RCD1-SRO-TAF4 (RST) plant domain;; Poly(ADP-ribose) polymerase catalytic domain	Probable inactive poly [ADP-ribose] polymerase SRO1 GN=T32F12.11 OS=Arabidopsis thaliana (Mouse-ear cress) PE=1 SV=2	S	Function unknown	PREDICTED: uncharacterized protein LOC101782173 isoform X4 [Setaria italica]
Seita.1G040600	Seita.1G040600	13.9873	2001	13.252	2498	12.2107	1968	13.6827	1964	11.6274	1997	14.5619	2170	1	0.0723798	normal	[K]	Transcription	Biological Process: transcription, DNA-templated (GO:0006351);;	--	--	[K]	Transcription	Transcription factor S-II (TFIIS), central domain;; SPOC domain	--	K	Transcription	PREDICTED: death-inducer obliterator 1-like isoform X1 [Setaria italica]
Seita.1G040700	Seita.1G040700	3.11767	158	1.34956	90	1.57736	90	2.07938	106	2.03428	124	2.69402	142	0.999404	-0.167739	normal	[S]	Function unknown	Cellular Component: chloroplast envelope (GO:0009941);;	--	--	--	--	Protein of unknown function (DUF819)	--	S	Function unknown	PREDICTED: uncharacterized protein LOC101784065 [Setaria italica]
Seita.1G040800	Seita.1G040800	6.70604	819	122.657	19235	129.937	17000	90.6818	11288	87.6431	12986	88.7813	11393	1	0.11937	normal	--	--	Molecular Function: DNA binding (GO:0003677);; Molecular Function: chromatin binding (GO:0003682);;	--	--	--	--	--	Telomere repeat-binding protein 5 GN=F22G5.8 OS=Arabidopsis thaliana (Mouse-ear cress) PE=1 SV=2	R	General function prediction only	PREDICTED: telomere repeat-binding protein 5-like [Setaria italica]
Seita.1G040900	Seita.1G040900	16.8559	584	0.299201	14	0.662207	26	0.057527	2	0	0	0.055413	2	--	--	--	--	--	--	--	--	--	--	Cysteine-rich TM module stress tolerance	--	--	--	PREDICTED: uncharacterized protein LOC101784881 [Setaria italica]
Seita.1G041000	Seita.1G041000	0.326899	70	0.486616	134	0.730202	173	0.717883	150	1.12893	284	2.9716	645	0.611851	-1.49176	normal	[V]	Defense mechanisms	Molecular Function: ATP binding (GO:0005524);; Cellular Component: plasma membrane (GO:0005886);; Biological Process: ATP catabolic process (GO:0006200);; Biological Process: drug transmembrane transport (GO:0006855);; Biological Process: defense response (GO:0006952);; Cellular Component: integral component of membrane (GO:0016021);; Molecular Function: ATPase activity (GO:0016887);;	--	--	[Q]	Secondary metabolites biosynthesis, transport and catabolism	ABC-2 type transporter;; ABC transporter;; Plant PDR ABC transporter associated;; ABC-transporter extracellular N-terminal;; AAA domain;; AAA domain;; ATPase family associated with various cellular activities (AAA);; Protein of unknown function, DUF258	Putative pleiotropic drug resistance protein 7 OS=Oryza sativa subsp. japonica (Rice) PE=3 SV=1	Q	Secondary metabolites biosynthesis, transport and catabolism	PREDICTED: putative pleiotropic drug resistance protein 7-like [Setaria italica]
Seita.1G041100	Seita.1G041100	0	0	0.002302	1	0.036549	1	0	0	0.052338	1	0.204112	4	--	--	--	--	--	--	--	--	--	--	--	--	--	--	--
Seita.1G041200	Seita.1G041200	46.1613	1988	21.8997	1271	20.1761	864	33.6517	1504	25.915	1413	22.8295	1021	1	0.0296732	normal	--	--	Molecular Function: nucleotide binding (GO:0000166);; Molecular Function: RNA binding (GO:0003723);;	--	--	--	--	--	--	S	Function unknown	PREDICTED: uncharacterized protein LOC101785674 isoform X3 [Setaria italica]
Seita.1G041300	Seita.1G041300	53.7089	4742	18.845	2193	20.5776	2047	31.8874	2825	24.0156	2546	28.7444	2644	0.996351	0.117874	normal	[C]	Energy production and conversion	Molecular Function: ATP:ADP antiporter activity (GO:0005471);; Molecular Function: ATP binding (GO:0005524);; Biological Process: transport (GO:0006810);; Cellular Component: chloroplast envelope (GO:0009941);; Cellular Component: integral component of membrane (GO:0016021);;	K03301|0|sita:101786874|plastidic ATP/ADP-transporter-like; K03301 ATP:ADP antiporter, AAA family (A)	--	--	--	TLC ATP/ADP transporter	Plastidic ATP/ADP-transporter OS=Solanum tuberosum (Potato) PE=2 SV=2	P	Inorganic ion transport and metabolism	PREDICTED: plastidic ATP/ADP-transporter-like [Setaria italica]
Seita.1G041400	Seita.1G041400	0.128635	17	0	0	0	0	0.015381	3	0.012857	3	0	0	--	--	--	[RTKL]	General function prediction only;; Signal transduction mechanisms;; Transcription;; Replication, recombination and repair	Molecular Function: protein serine/threonine kinase activity (GO:0004674);; Molecular Function: ATP binding (GO:0005524);; Cellular Component: mitochondrion (GO:0005739);; Biological Process: protein phosphorylation (GO:0006468);; Cellular Component: integral component of membrane (GO:0016021);; Cellular Component: cytoplasmic membrane-bounded vesicle (GO:0016023);;	--	--	--	--	Protein kinase domain;; Leucine rich repeat;; Protein tyrosine kinase;; Leucine Rich repeats (2 copies);; Leucine Rich Repeat;; Leucine rich repeat N-terminal domain	Probable LRR receptor-like serine/threonine-protein kinase At3g47570 (Precursor) GN=At3g47570 OS=Arabidopsis thaliana (Mouse-ear cress) PE=2 SV=1	T	Signal transduction mechanisms	PREDICTED: probable LRR receptor-like serine/threonine-protein kinase At3g47570-like [Setaria italica]
Seita.1G041500	Seita.1G041500	22.4474	1267	2.43639	182	2.28017	145	1.81359	103	2.30323	156	3.99869	235	0.848361	1.58158	normal	--	--	Biological Process: metabolic process (GO:0008152);; Molecular Function: transferase activity, transferring hexosyl groups (GO:0016758);;	K13496|0|sita:101752724|UDP-glycosyltransferase 73C6-like (A)	--	[GC]	Carbohydrate transport and metabolism;; Energy production and conversion	UDP-glucoronosyl and UDP-glucosyl transferase	UDP-glycosyltransferase 73C1 GN=F13K3.15 OS=Arabidopsis thaliana (Mouse-ear cress) PE=2 SV=1	2007		PREDICTED: UDP-glycosyltransferase 73C6-like [Setaria italica]
Seita.1G041600	Seita.1G041600	29.2819	1696	6.8936	526	7.4529	486	8.44064	491	6.50338	452	14.2659	861	0.932504	0.504746	normal	--	--	Biological Process: metabolic process (GO:0008152);; Molecular Function: transferase activity, transferring hexosyl groups (GO:0016758);;	--	--	[GC]	Carbohydrate transport and metabolism;; Energy production and conversion	UDP-glucoronosyl and UDP-glucosyl transferase	UDP-glycosyltransferase 73C1 GN=F13K3.15 OS=Arabidopsis thaliana (Mouse-ear cress) PE=2 SV=1	2321		PREDICTED: UDP-glycosyltransferase 73C1-like [Setaria italica]
Seita.1G041700	Seita.1G041700	12.9899	1095	47.5844	5286	45.185	4290	15.2189	1288	14.9525	1514	14.6496	1287	0.481622	1.42981	normal	--	--	Biological Process: metabolic process (GO:0008152);; Cellular Component: plastid (GO:0009536);; Molecular Function: transferase activity, transferring hexosyl groups (GO:0016758);;	--	--	[GC]	Carbohydrate transport and metabolism;; Energy production and conversion	UDP-glucoronosyl and UDP-glucosyl transferase	UDP-glycosyltransferase 73C3 GN=UGT73C3 OS=Arabidopsis thaliana (Mouse-ear cress) PE=2 SV=1	2486		PREDICTED: UDP-glycosyltransferase 73C3-like [Setaria italica]
Seita.1G041800	Seita.1G041800	1.38517	73	2.59441	180	2.32251	138	2.90224	153	2.77837	175	3.72141	204	0.957466	-0.42515	normal	--	--	--	--	--	--	--	--	--	R	General function prediction only	PREDICTED: uncharacterized protein LOC101769568 [Setaria italica]
Seita.1G041900	Seita.1G041900	29.5449	1657	25.6505	1896	28.1664	1779	28.2991	1593	25.1364	1692	25.0088	1461	0.995214	0.17477	normal	--	--	Biological Process: metabolic process (GO:0008152);; Cellular Component: plastid (GO:0009536);; Molecular Function: transferase activity, transferring hexosyl groups (GO:0016758);;	--	--	[GC]	Carbohydrate transport and metabolism;; Energy production and conversion	UDP-glucoronosyl and UDP-glucosyl transferase	UDP-glycosyltransferase 73C3 GN=UGT73C3 OS=Arabidopsis thaliana (Mouse-ear cress) PE=2 SV=1	2263		PREDICTED: UDP-glycosyltransferase 73C3-like [Setaria italica]
Seita.1G042000	Seita.1G042000	3.92838	226	14.9873	1135	14.4475	935	4.43596	256	3.97634	275	1.22198	74	0.286492	1.9886	normal	--	--	Biological Process: metabolic process (GO:0008152);; Cellular Component: plastid (GO:0009536);; Molecular Function: transferase activity, transferring hexosyl groups (GO:0016758);;	--	--	[GC]	Carbohydrate transport and metabolism;; Energy production and conversion	UDP-glucoronosyl and UDP-glucosyl transferase	UDP-glycosyltransferase 73C1 GN=F13K3.15 OS=Arabidopsis thaliana (Mouse-ear cress) PE=2 SV=1	2082		PREDICTED: UDP-glycosyltransferase 73C1-like [Setaria italica]
Seita.1G042100	Seita.1G042100	0.030807	2	0	0	0	0	0.030699	2	0.062441	5	0.029669	3	--	--	--	--	--	Cellular Component: mitochondrion (GO:0005739);;	--	--	--	--	--	--	S	Function unknown	PREDICTED: LOW QUALITY PROTEIN: putative F-box protein At1g58310-like [Setaria italica]
Seita.1G042200	Seita.1G042200	0	0	0	0	0.01881	2	0	0	0	0	0	0	--	--	--	--	--	Cellular Component: mitochondrion (GO:0005739);;	--	--	--	--	F-box domain	--	S	Function unknown	PREDICTED: uncharacterized protein LOC101754357 [Setaria italica]
Seita.1G042300	Seita.1G042300	0.329495	18	0.334948	24	0.25575	16	0.063081	4	0.083606	6	0.054971	3	--	--	--	--	--	Cellular Component: mitochondrion (GO:0005739);;	--	--	--	--	--	--	S	Function unknown	PREDICTED: LOW QUALITY PROTEIN: putative F-box protein At1g58310-like [Setaria italica]
Seita.1G042400	Seita.1G042400	14.4778	1389	13.5819	1717	20.4383	2209	14.8197	1427	12.059	1389	23.7789	2377	1	0.0442548	normal	--	--	Biological Process: fatty acid biosynthetic process (GO:0006633);; Biological Process: response to cold (GO:0009409);; Biological Process: response to light stimulus (GO:0009416);; Cellular Component: membrane (GO:0016020);; Molecular Function: transferase activity, transferring acyl groups other than amino-acyl groups (GO:0016747);;	K15397|0|sita:101754757|3-ketoacyl-CoA synthase 11-like; K15397 3-ketoacyl-CoA synthase [EC:2.3.1.199] (A)	Fatty acid elongation (ko00062)	--	--	FAE1/Type III polyketide synthase-like protein;; 3-Oxoacyl-[acyl-carrier-protein (ACP)] synthase III C terminal;; Chalcone and stilbene synthases, C-terminal domain;; Chalcone and stilbene synthases, N-terminal domain;; 3-Oxoacyl-[acyl-carrier-protein (ACP)] synthase III	3-ketoacyl-CoA synthase 11 GN=KCS11 OS=Arabidopsis thaliana (Mouse-ear cress) PE=2 SV=1	I	Lipid transport and metabolism	PREDICTED: 3-ketoacyl-CoA synthase 11-like [Setaria italica]
Seita.1G042500	Seita.1G042500	19.1817	1406	14.2985	1302	14.4403	1128	15.1173	1013	12.3798	1049	14.0762	980	0.951766	0.325062	normal	[R]	General function prediction only	Molecular Function: kinase activity (GO:0016301);; Biological Process: phosphorylation (GO:0016310);;	K13137|0|sita:101755164|serine-threonine kinase receptor-associated protein-like; K13137 serine-threonine kinase receptor-associated protein (A)	RNA transport (ko03013)	[I]	Lipid transport and metabolism	WD domain, G-beta repeat	Eukaryotic translation initiation factor 3 subunit I {ECO:0000255|HAMAP-Rule:MF_03008} GN=TIF3I1 OS=Arabidopsis thaliana (Mouse-ear cress) PE=2 SV=2	I	Lipid transport and metabolism	PREDICTED: serine-threonine kinase receptor-associated protein-like [Setaria italica]
Seita.1G042600	Seita.1G042600	52.5839	3606	54.7098	4944	56.9678	4400	70.2363	4833	62.0473	5108	64.8025	4630	0.995214	-0.159593	normal	[O]	Posttranslational modification, protein turnover, chaperones	Cellular Component: proteasome complex (GO:0000502);; Molecular Function: ATP binding (GO:0005524);; Cellular Component: cytoplasm (GO:0005737);; Biological Process: proteolysis (GO:0006508);; Molecular Function: peptidase activity (GO:0008233);; Molecular Function: nucleoside-triphosphatase activity (GO:0017111);; Biological Process: protein catabolic process (GO:0030163);;	K03066|0|zma:100273032|hypothetical protein; K03066 26S proteasome regulatory subunit T6 (A)	Proteasome (ko03050)	[O]	Posttranslational modification, protein turnover, chaperones	ATPase family associated with various cellular activities (AAA);; AAA domain (Cdc48 subfamily);; AAA domain (dynein-related subfamily);; Holliday junction DNA helicase ruvB N-terminus	26S protease regulatory subunit 8 homolog A GN=F28I16.140 OS=Arabidopsis thaliana (Mouse-ear cress) PE=1 SV=1	O	Posttranslational modification, protein turnover, chaperones	hypothetical protein [Zea mays]
Seita.1G042700	Seita.1G042700	0	0	0	0	0	0	0	0	0	0	0	0	--	--	--	--	--	Cellular Component: plant-type cell wall (GO:0009505);; Cellular Component: cytoplasmic membrane-bounded vesicle (GO:0016023);; Biological Process: response to karrikin (GO:0080167);;	--	--	--	--	Protein of unknown function (DUF642)	--	R	General function prediction only	PREDICTED: uncharacterized protein LOC101755979 [Setaria italica]
Seita.1G042800	Seita.1G042800	3.37715	277	0.479001	56	0.513854	47	1.12571	96	1.5933	161	1.15634	100	1	0.0226294	normal	[Q]	Secondary metabolites biosynthesis, transport and catabolism	Molecular Function: iron ion binding (GO:0005506);; Molecular Function: steroid hydroxylase activity (GO:0008395);; Molecular Function: electron carrier activity (GO:0009055);; Biological Process: response to light stimulus (GO:0009416);; Biological Process: response to brassinosteroid (GO:0009741);; Biological Process: brassinosteroid homeostasis (GO:0010268);; Cellular Component: integral compo…	K15639|0|sita:101756376|cytochrome P450 734A2-like; K15639 PHYB activation tagged suppressor 1 [EC:1.14.-.-] (A)	Brassinosteroid biosynthesis (ko00905)	[QI]	Secondary metabolites biosynthesis, transport and catabolism;; Lipid transport and metabolism	Cytochrome P450	Cytochrome P450 734A2 OS=Oryza sativa subsp. japonica (Rice) PE=2 SV=1	Q	Secondary metabolites biosynthesis, transport and catabolism	PREDICTED: cytochrome P450 734A2-like [Setaria italica]
Seita.1G042900	Seita.1G042900	0	0	0	0	0	0	0	0	0	0	0	0	--	--	--	--	--	--	--	--	--	--	GRF zinc finger	--	--	--	PREDICTED: uncharacterized protein LOC101785524 [Setaria italica]
Seita.1G043000	Seita.1G043000	0	0	0	0	0	0	0	0	0	0	0	0	--	--	--	--	--	--	--	--	--	--	--	--	--	--	--
Seita.1G043100	Seita.1G043100	0	0	0	0	0	0	0	0	0	0	0	0	--	--	--	--	--	--	--	--	--	--	--	--	R	General function prediction only	hypothetical protein SORBIDRAFT_03g029980 [Sorghum bicolor]
Seita.1G043200	Seita.1G043200	17.5657	1354	43.6718	4502	43.6767	3862	31.1325	2478	32.0153	3048	35.3103	2912	0.993602	0.242749	normal	[L]	Replication, recombination and repair	Molecular Function: nucleotide binding (GO:0000166);; Molecular Function: DNA binding (GO:0003677);; Molecular Function: DNA (6-4) photolyase activity (GO:0003914);; Biological Process: DNA repair (GO:0006281);; Biological Process: response to UV (GO:0009411);;	K02295|0|sita:101756787|(6-4)DNA photolyase-like; K02295 cryptochrome (A)	--	[LT]	Replication, recombination and repair;; Signal transduction mechanisms	FAD binding domain of DNA photolyase;; DNA photolyase	(6-4)DNA photolyase OS=Oryza sativa subsp. japonica (Rice) PE=3 SV=1	L	Replication, recombination and repair	PREDICTED: (6-4)DNA photolyase-like isoform X3 [Setaria italica]
Seita.1G043300	Seita.1G043300	55.6889	6657	48.5909	7676	46.0223	6231	47.6375	5777	42.1191	6053	37.4577	5149	0.981967	0.275844	normal	[O]	Posttranslational modification, protein turnover, chaperones	Molecular Function: isomerase activity (GO:0016853);; Biological Process: cellular protein metabolic process (GO:0044267);;	K09566|1.83475e-139|sita:101757732|serine/arginine repetitive matrix protein 2-like; K09566 peptidyl-prolyl isomerase G (cyclophilin G) [EC:5.2.1.8] (A)	--	[O]	Posttranslational modification, protein turnover, chaperones	Cyclophilin type peptidyl-prolyl cis-trans isomerase/CLD	Peptidyl-prolyl cis-trans isomerase CYP63 GN=MAA21.30 OS=Arabidopsis thaliana (Mouse-ear cress) PE=1 SV=1	O	Posttranslational modification, protein turnover, chaperones	PREDICTED: serine/arginine repetitive matrix protein 2-like isoform X1 [Setaria italica]
Seita.1G043400	Seita.1G043400	9.4722	631	3.39176	298	3.07284	231	2.8916	194	2.90484	232	4.26873	296	0.806332	0.629827	normal	--	--	Cellular Component: mitochondrion (GO:0005739);;	--	--	--	--	TPR repeat;; Tetratricopeptide repeat;; Tetratricopeptide repeat;; Tetratricopeptide repeat;; Tetratricopeptide repeat;; Tetratricopeptide repeat;; Tetratricopeptide repeat	--	R	General function prediction only	PREDICTED: uncharacterized protein LOC101758681 [Setaria italica]
Seita.1G043500	Seita.1G043500	58.9864	2224	137.243	6907	136.165	6037	110.354	4324	100.039	4615	87.2604	4259	0.993602	0.237156	normal	--	--	Molecular Function: zinc ion binding (GO:0008270);;	--	--	[R]	General function prediction only	Zn-finger in Ran binding protein and others	--	R	General function prediction only	PREDICTED: uncharacterized RNA-binding protein C17H9.04c-like isoform X1 [Setaria italica]
Seita.1G043600	Seita.1G043600	12.3287	1967	8.89932	1871	8.55786	1538	9.50201	1521	8.59231	1645	13.6897	2275	1	-0.0368337	normal	--	--	Cellular Component: mitochondrion (GO:0005739);; Biological Process: defense response (GO:0006952);; Cellular Component: cytoplasmic membrane-bounded vesicle (GO:0016023);; Molecular Function: ADP binding (GO:0043531);;	--	--	--	--	NB-ARC domain	Late blight resistance protein R1-A GN=R1A OS=Solanum demissum (Wild potato) PE=3 SV=1	S	Function unknown	PREDICTED: uncharacterized protein LOC101760035 [Setaria italica]
Seita.1G043700	Seita.1G043700	3.72206	100	1.72783	61	1.03446	32	2.16994	58	2.4643	79	3.8936	109	0.981967	-0.408154	normal	--	--	--	--	--	--	--	--	--	S	Function unknown	PREDICTED: uncharacterized protein At1g15400-like [Setaria italica]
Seita.1G043800	Seita.1G043800	5.55017	268	153.421	9995	142.725	7789	93.5417	4600	112.155	6581	104.032	5309	1	0.196917	normal	--	--	Molecular Function: double-stranded DNA binding (GO:0003690);; Molecular Function: sequence-specific DNA binding transcription factor activity (GO:0003700);; Cellular Component: nucleus (GO:0005634);; Biological Process: regulation of transcription, DNA-templated (GO:0006355);; Cellular Component: plastid (GO:0009536);; Biological Process: response to abscisic acid (GO:0009737);; Biological Proce…	K16241|5.40311e-73|sita:101760850|transcription factor HY5-like; K16241 transcription factor HY5 (A)	Circadian rhythm - plant (ko04712)	[K]	Transcription	bZIP transcription factor;; Basic region leucine zipper	Transcription factor HY5 GN=HY5 OS=Solanum lycopersicum (Tomato) PE=2 SV=1	K	Transcription	PREDICTED: transcription factor HY5-like [Setaria italica]
Seita.1G043900	Seita.1G043900	3.83431	216	1.16362	87	1.54391	98	6.76294	382	6.69676	452	7.68039	450	0.063934	-1.71756	normal	--	--	--	--	--	[R]	General function prediction only	Kelch motif;; Kelch motif;; Galactose oxidase, central domain;; Kelch motif;; Galactose oxidase, central domain;; F-box domain	F-box/kelch-repeat protein At1g55270 GN=At1g55270 OS=Arabidopsis thaliana (Mouse-ear cress) PE=2 SV=1	R	General function prediction only	PREDICTED: F-box/kelch-repeat protein At1g55270-like [Setaria italica]
Seita.1G044000	Seita.1G044000	9.54263	505	13.8423	965	14.5891	869	13.0658	694	11.3839	723	14.2382	785	1	0.106508	normal	--	--	Cellular Component: mitochondrion (GO:0005739);;	--	--	[MOT]	Cell wall/membrane/envelope biogenesis;; Posttranslational modification, protein turnover, chaperones;; Signal transduction mechanisms	Sel1 repeat	--	1328		PREDICTED: uncharacterized protein LOC101761646 [Setaria italica]
Seita.1G044100	Seita.1G044100	20.9537	632	9.15588	364	11.5129	392	14.8882	451	14.5928	529	10.8574	342	1	0.0585827	normal	--	--	Molecular Function: nucleic acid binding (GO:0003676);;	--	--	--	--	Alba	Uncharacterized protein At2g34160 GN=At2g34160 OS=Arabidopsis thaliana (Mouse-ear cress) PE=1 SV=1	S	Function unknown	PREDICTED: uncharacterized protein At2g34160-like [Setaria italica]
Seita.1G044200	Seita.1G044200	0	0	0.023544	2	0	0	0	0	0	0	0	0	--	--	--	--	--	Cellular Component: mitochondrial inner membrane (GO:0005743);; Biological Process: nucleotide transport (GO:0006862);; Biological Process: carbohydrate transport (GO:0008643);; Cellular Component: chloroplast inner membrane (GO:0009706);; Molecular Function: nucleotide transmembrane transporter activity (GO:0015215);; Cellular Component: integral component of membrane (GO:0016021);; Cellular Com…	--	--	[C]	Energy production and conversion	Mitochondrial carrier protein	Adenine nucleotide transporter BT1, chloroplastic/amyloplastic/mitochondrial (Precursor) GN=BT1 OS=Zea mays (Maize) PE=1 SV=1	C	Energy production and conversion	PREDICTED: adenine nucleotide transporter BT1, chloroplastic/amyloplastic/mitochondrial-like [Setaria italica]
Seita.1G044300	Seita.1G044300	7.00706	1534	5.58315	1602	5.26678	1292	6.28528	1377	5.44238	1425	5.40885	1229	0.999228	0.129631	normal	--	--	Cellular Component: nuclear pore (GO:0005643);; Cellular Component: chloroplast (GO:0009507);;	K14310|0|sbi:SORBI_04g007000|SORBIDRAFT_04g007000, Sb04g007000; hypothetical protein; K14310 nuclear pore complex protein Nup205 (A)	RNA transport (ko03013)	[S]	Function unknown	Protein of unknown function (DUF3414)	Nuclear pore complex protein NUP205 {ECO:0000303|PubMed:21189294} OS=Arabidopsis thaliana (Mouse-ear cress) PE=1 SV=1	S	Function unknown	hypothetical protein SORBIDRAFT_04g007000 [Sorghum bicolor]
Seita.1G044400	Seita.1G044400	0.100825	5	0.092677	6	0.162978	9	0.026879	2	0.122293	7	0.082499	5	--	--	--	--	--	--	--	--	--	--	--	--	--	--	PREDICTED: uncharacterized protein LOC101756320 [Setaria italica]
Seita.1G044500	Seita.1G044500	96.0463	4784	98.3987	6458	96.0784	5390	131.71	6583	515.438	30817	993.808	51562	0.33021	-2.41612	normal	--	--	Cellular Component: nucleus (GO:0005634);; Biological Process: cellular response to cold (GO:0070417);; Biological Process: positive regulation of cellular response to phosphate starvation (GO:0080040);;	--	--	[P]	Inorganic ion transport and metabolism	SPX domain	SPX domain-containing protein 1 GN=SPX1 OS=Oryza sativa subsp. indica (Rice) PE=3 SV=1	P	Inorganic ion transport and metabolism	PREDICTED: SPX domain-containing protein 1-like [Setaria italica]
Seita.1G044600	Seita.1G044600	2.14906	321	3.41281	576	2.87125	440	4.02048	562	4.83092	776	4.47373	607	0.849296	-0.519105	normal	[LKJ]	Replication, recombination and repair;; Transcription;; Translation, ribosomal structure and biogenesis	Molecular Function: RNA binding (GO:0003723);; Molecular Function: ATP binding (GO:0005524);; Molecular Function: ATP-dependent helicase activity (GO:0008026);; Molecular Function: metal ion binding (GO:0046872);;	--	--	[A]	RNA processing and modification	DEAD/DEAH box helicase;; Helicase conserved C-terminal domain;; HIT zinc finger	DEAD-box ATP-dependent RNA helicase 41 OS=Oryza sativa subsp. japonica (Rice) PE=2 SV=2	A	RNA processing and modification	PREDICTED: DEAD-box ATP-dependent RNA helicase 41-like isoform X1 [Setaria italica]
Seita.1G044700	Seita.1G044700	1.26921	50	0.87843	46	0.941898	42	1.21146	48	1.43377	68	0.907498	37	0.999228	-0.137246	normal	--	--	Molecular Function: sequence-specific DNA binding transcription factor activity (GO:0003700);; Cellular Component: nucleus (GO:0005634);; Cellular Component: mitochondrion (GO:0005739);; Biological Process: regulation of transcription, DNA-templated (GO:0006355);; Biological Process: response to water deprivation (GO:0009414);; Biological Process: cutin biosynthetic process (GO:0010143);; Biologi…	--	--	--	--	AP2 domain	Ethylene-responsive transcription factor WIN1 GN=F9L1.31 OS=Arabidopsis thaliana (Mouse-ear cress) PE=2 SV=1	K	Transcription	PREDICTED: ethylene-responsive transcription factor WIN1-like [Setaria italica]
Seita.1G044800	Seita.1G044800	0.354655	38	0.113325	16	0.158486	19	0.103129	12	0.193103	25	0.225109	25	--	--	--	--	--	Molecular Function: calcium ion binding (GO:0005509);; Cellular Component: integral component of membrane (GO:0016021);; Biological Process: transmembrane transport (GO:0055085);;	K14684|0|sita:101765167|calcium-binding mitochondrial carrier protein SCaMC-3-like; K14684 solute carrier family 25 (mitochondrial phosphate transporter), member 23/24/25/41 (A)	--	[F]	Nucleotide transport and metabolism	Mitochondrial carrier protein;; EF-hand domain pair;; EF hand;; EF-hand domain;; EF-hand domain pair;; EF hand	Mitochondrial adenine nucleotide transporter ADNT1 OS=Arabidopsis thaliana (Mouse-ear cress) PE=2 SV=1	C	Energy production and conversion	PREDICTED: calcium-binding mitochondrial carrier protein SCaMC-3-like isoform X1 [Setaria italica]
Seita.1G044900	Seita.1G044900	0.448498	21	0.067945	4	0.133631	7	0.056633	3	0.071352	4	0.035935	2	--	--	--	--	--	--	--	--	--	--	--	--	Q	Secondary metabolites biosynthesis, transport and catabolism	PREDICTED: ABC transporter C family member 14-like isoform X2 [Setaria italica]
Seita.1G045000	Seita.1G045000	24.027	1350	3.41423	253	3.33213	211	4.60204	260	5.67929	384	7.18185	421	0.952121	0.680096	normal	--	--	--	--	--	--	--	Protein phosphatase inhibitor	--	S	Function unknown	PREDICTED: uncharacterized protein LOC101765845 [Setaria italica]
Seita.1G045100	Seita.1G045100	61.7667	2549	49.9012	2703	54.6207	2406	42.33	1665	43.8516	2058	26.3841	1073	0.648172	0.689507	normal	--	--	--	--	--	--	--	Protein of unknown function (DUF4050)	--	R	General function prediction only	PREDICTED: uncharacterized protein LOC101766260 isoform X1 [Setaria italica]
Seita.1G045200	Seita.1G045200	1.96408	63	0.328301	14	0.348752	13	1.00426	32	0.836124	32	0.586858	20	--	--	--	[O]	Posttranslational modification, protein turnover, chaperones	Cellular Component: mitochondrion (GO:0005739);; Biological Process: protein folding (GO:0006457);; Biological Process: heat acclimation (GO:0010286);;	K13993|1.62239e-82|sita:101766952|23.6 kDa heat shock protein, mitochondrial-like; K13993 HSP20 family protein (A)	Protein processing in endoplasmic reticulum (ko04141)	[O]	Posttranslational modification, protein turnover, chaperones	Hsp20/alpha crystallin family	23.6 kDa heat shock protein, mitochondrial (Precursor) GN=P0419A09.16-1 OS=Oryza sativa subsp. japonica (Rice) PE=2 SV=1	O	Posttranslational modification, protein turnover, chaperones	PREDICTED: 23.6 kDa heat shock protein, mitochondrial-like [Setaria italica]
Seita.1G045300	Seita.1G045300	3.4081	268	2.18397	213	2.26151	195	2.3444	183	2.23665	216	2.22688	179	0.995214	0.217113	normal	--	--	Molecular Function: ATP:ADP antiporter activity (GO:0005471);; Cellular Component: mitochondrial inner membrane (GO:0005743);; Cellular Component: endoplasmic reticulum membrane (GO:0005789);; Cellular Component: integral component of membrane (GO:0016021);; Biological Process: seed development (GO:0048316);; Biological Process: root development (GO:0048364);; Biological Process: adenine nucleoti…	K05863|0|sita:101767352|ADP, ATP carrier protein ER-ANT1-like; K05863 solute carrier family 25 (mitochondrial adenine nucleotide translocator), member 4/5/6/31 (A)	--	[C]	Energy production and conversion	Mitochondrial carrier protein	ADP,ATP carrier protein ER-ANT1 GN=ER-ANT1 OS=Arabidopsis thaliana (Mouse-ear cress) PE=2 SV=2	C	Energy production and conversion	PREDICTED: ADP,ATP carrier protein ER-ANT1-like [Setaria italica]
Seita.1G045400	Seita.1G045400	0.810515	38	0.031728	2	0	0	0	0	0.053309	4	0	0	--	--	--	[QR]	Secondary metabolites biosynthesis, transport and catabolism;; General function prediction only	Molecular Function: O-methyltransferase activity (GO:0008171);; Molecular Function: protein dimerization activity (GO:0046983);;	--	--	[R]	General function prediction only	O-methyltransferase;; Dimerisation domain	Trans-resveratrol di-O-methyltransferase GN=ROMT OS=Vitis vinifera (Grape) PE=1 SV=2	R	General function prediction only	PREDICTED: trans-resveratrol di-O-methyltransferase-like [Setaria italica]
Seita.1G045500	Seita.1G045500	29.671	6558	22.8144	6649	21.7223	5413	25.4106	6322	20.6958	6812	22.4583	6166	1	-0.0587634	normal	--	--	Cellular Component: nucleus (GO:0005634);; Cellular Component: mitochondrion (GO:0005739);; Biological Process: response to ethylene (GO:0009723);; Cellular Component: SCF ubiquitin ligase complex (GO:0019005);;	K14515|0|sita:101768159|EIN3-binding F-box protein 1-like; K14515 EIN3-binding F-box protein (A)	Plant hormone signal transduction (ko04075)	[R]	General function prediction only	Leucine Rich repeat;; Leucine Rich repeats (2 copies);; Leucine Rich Repeat;; Leucine rich repeat;; Leucine rich repeat	EIN3-binding F-box protein 1 GN=F13B15.15 OS=Arabidopsis thaliana (Mouse-ear cress) PE=1 SV=1	R	General function prediction only	PREDICTED: EIN3-binding F-box protein 1-like [Setaria italica]
Seita.1G045600	Seita.1G045600	1.09492	38	0.680395	31	0.564247	22	0.680918	24	0.560949	24	0.24161	9	--	--	--	--	--	Molecular Function: O-methyltransferase activity (GO:0008171);; Molecular Function: protein dimerization activity (GO:0046983);;	--	--	[R]	General function prediction only	O-methyltransferase;; Dimerisation domain	Probable O-methyltransferase 2 GN=OMT2 OS=Sorghum bicolor (Sorghum) PE=2 SV=1	R	General function prediction only	PREDICTED: trans-resveratrol di-O-methyltransferase-like [Setaria italica]
Seita.1G045700	Seita.1G045700	2.0113	135	0.684943	61	0.549502	42	0.808459	55	1.24655	101	0.524102	37	0.992981	0.279356	normal	--	--	Cellular Component: plastid (GO:0009536);;	--	--	--	--	Targeting protein for Xklp2 (TPX2)	Protein WVD2-like 1 GN=WDL1 OS=Arabidopsis thaliana (Mouse-ear cress) PE=1 SV=1	S	Function unknown	hypothetical protein [Zea mays]
Seita.1G045800	Seita.1G045800	24.5496	3254	11.8872	2077	13.858	2069	18.6916	2487	16.498	2626	11.5183	1591	0.999228	0.130799	normal	--	--	Molecular Function: hydrolase activity, hydrolyzing O-glycosyl compounds (GO:0004553);; Cellular Component: mitochondrion (GO:0005739);; Biological Process: carbohydrate metabolic process (GO:0005975);;	--	--	--	--	Glycosyl hydrolases family 17	Glucan endo-1,3-beta-glucosidase 14 (Precursor) GN=At2g27500 OS=Arabidopsis thaliana (Mouse-ear cress) PE=1 SV=2	R	General function prediction only	PREDICTED: glucan endo-1,3-beta-glucosidase 14-like [Setaria italica]
Seita.1G045900	Seita.1G045900	9.06762	526	2.98897	229	2.79301	183	6.32789	369	5.20605	363	4.85526	294	0.999228	-0.179405	normal	--	--	Molecular Function: transporter activity (GO:0005215);; Cellular Component: intracellular (GO:0005622);; Biological Process: transport (GO:0006810);;	--	--	[I]	Lipid transport and metabolism	CRAL/TRIO domain;; CRAL/TRIO, N-terminal domain	Phosphatidylinositol/phosphatidylcholine transfer protein SFH2 GN=SFH2 OS=Arabidopsis thaliana (Mouse-ear cress) PE=2 SV=1	I	Lipid transport and metabolism	PREDICTED: protein real-time-like [Setaria italica]
Seita.1G046000	Seita.1G046000	43.2734	2823	52.008	4471	54.4576	4001	65.8985	4314	61.4973	4816	66.9331	4549	0.97742	-0.259565	normal	[O]	Posttranslational modification, protein turnover, chaperones	Molecular Function: protein binding (GO:0005515);; Molecular Function: ATP binding (GO:0005524);; Cellular Component: cell wall (GO:0005618);; Cellular Component: nucleolus (GO:0005730);; Cellular Component: cytoplasm (GO:0005737);; Cellular Component: plasma membrane (GO:0005886);; Biological Process: proteolysis (GO:0006508);; Molecular Function: peptidase activity (GO:0008233);; Cellular Compo…	K03064|0|sita:101770572|26S protease regulatory subunit S10B homolog B-like; K03064 26S proteasome regulatory subunit T4 (A)	Proteasome (ko03050)	[O]	Posttranslational modification, protein turnover, chaperones	ATPase family associated with various cellular activities (AAA);; AAA ATPase domain;; AAA domain (Cdc48 subfamily);; Holliday junction DNA helicase ruvB N-terminus;; AAA domain (dynein-related subfamily)	26S protease regulatory subunit S10B homolog B GN=RPT4B OS=Arabidopsis thaliana (Mouse-ear cress) PE=1 SV=1	O	Posttranslational modification, protein turnover, chaperones	PREDICTED: 26S protease regulatory subunit S10B homolog B-like [Setaria italica]
Seita.1G046100	Seita.1G046100	0.125457	18	0.037212	8	0.097456	16	0.148433	22	0.103874	18	0.135293	21	--	--	--	--	--	Biological Process: pollen maturation (GO:0010152);; Biological Process: calcium-mediated signaling (GO:0019722);; Biological Process: phosphatidylinositol-mediated signaling (GO:0048015);;	--	--	[S]	Function unknown	C2 domain;; GRAM domain	C2 and GRAM domain-containing protein At1g03370 GN=At1g03370 OS=Arabidopsis thaliana (Mouse-ear cress) PE=2 SV=4	R	General function prediction only	PREDICTED: C2 and GRAM domain-containing protein At1g03370-like [Setaria italica]
Seita.1G046200	Seita.1G046200	2.92221	203	0.545416	50	0.866685	68	0.283019	20	0.35859	30	0.247457	18	0.235756	2.19948	normal	--	--	--	--	--	[R]	General function prediction only	PPR repeat;; PPR repeat family;; Pentatricopeptide repeat domain	Pentatricopeptide repeat-containing protein At3g02490, mitochondrial (Precursor) GN=At3g02490 OS=Arabidopsis thaliana (Mouse-ear cress) PE=2 SV=1	S	Function unknown	PREDICTED: pentatricopeptide repeat-containing protein At3g02490, mitochondrial-like [Setaria italica]
Seita.1G046300	Seita.1G046300	9.03578	1117	4.86418	822	6.17134	879	2.54522	359	2.72393	460	3.20379	470	0.189743	1.12056	normal	--	--	--	--	--	--	--	F-box associated	F-box protein At5g65850 GN=At5g65850 OS=Arabidopsis thaliana (Mouse-ear cress) PE=2 SV=1	R	General function prediction only	PREDICTED: F-box protein At2g43440-like [Setaria italica]
Seita.1G046400	Seita.1G046400	7.89722	404	2.66579	179	2.9045	161	4.09614	209	4.08854	244	1.59444	89	0.951766	0.431873	normal	[O]	Posttranslational modification, protein turnover, chaperones	Biological Process: histone peptidyl-prolyl isomerization (GO:0000412);; Molecular Function: peptidyl-prolyl cis-trans isomerase activity (GO:0003755);; Molecular Function: FK506 binding (GO:0005528);; Cellular Component: nucleolus (GO:0005730);; Biological Process: protein folding (GO:0006457);; Cellular Component: chloroplast (GO:0009507);; Cellular Component: membrane (GO:0016020);;	--	--	[O]	Posttranslational modification, protein turnover, chaperones	FKBP-type peptidyl-prolyl cis-trans isomerase	Peptidyl-prolyl cis-trans isomerase FKBP16-1, chloroplastic (Precursor) GN=FKBP16-1 OS=Arabidopsis thaliana (Mouse-ear cress) PE=2 SV=1	O	Posttranslational modification, protein turnover, chaperones	PREDICTED: peptidyl-prolyl cis-trans isomerase FKBP16-1, chloroplastic-like [Setaria italica]
Seita.1G046500	Seita.1G046500	0.154393	9	0.013371	2	0.02855	2	0.017559	2	0.01371	1	0.033826	2	--	--	--	--	--	--	--	--	--	--	NB-ARC domain	--	S	Function unknown	hypothetical protein SORBIDRAFT_04g006770 [Sorghum bicolor]
Seita.1G046600	Seita.1G046600	8.13177	416	6.3808	430	6.89069	397	6.87558	353	6.6894	411	5.34007	285	0.992981	0.252782	normal	--	--	Molecular Function: structural constituent of ribosome (GO:0003735);; Cellular Component: mitochondrion (GO:0005739);; Biological Process: DNA-templated transcription, elongation (GO:0006354);; Biological Process: translation (GO:0006412);; Cellular Component: large ribosomal subunit (GO:0015934);;	K02935|4.78181e-63|sita:101772178|54S ribosomal protein L12, mitochondrial-like; K02935 large subunit ribosomal protein L7/L12 (A)	Ribosome (ko03010)	[J]	Translation, ribosomal structure and biogenesis	Ribosomal protein L7/L12 C-terminal domain	--	J	Translation, ribosomal structure and biogenesis	PREDICTED: 54S ribosomal protein L12, mitochondrial-like [Setaria italica]
Seita.1G046700	Seita.1G046700	0.055892	2	0	0	0	0	0	0	0	0	0	0	--	--	--	--	--	--	--	--	--	--	Plant protein of unknown function (DUF868)	--	S	Function unknown	PREDICTED: uncharacterized protein LOC101772581 [Setaria italica]
Seita.1G046800	Seita.1G046800	14.3609	1526	3.2983	463	4.05056	486	1.85187	201	2.27429	289	1.79848	201	0.278594	1.79562	normal	[O]	Posttranslational modification, protein turnover, chaperones	Molecular Function: serine-type endopeptidase activity (GO:0004252);; Cellular Component: cell wall (GO:0005618);; Biological Process: proteolysis (GO:0006508);; Cellular Component: cytoplasmic membrane-bounded vesicle (GO:0016023);; Molecular Function: identical protein binding (GO:0042802);; Biological Process: negative regulation of catalytic activity (GO:0043086);;	--	--	--	--	Subtilase family;; Peptidase inhibitor I9;; PA domain	Subtilisin-like protease SBT5.3 (Precursor) OS=Arabidopsis thaliana (Mouse-ear cress) PE=2 SV=1	O	Posttranslational modification, protein turnover, chaperones	PREDICTED: subtilisin-like protease-like isoform X1 [Setaria italica]
Seita.1G046900	Seita.1G046900	24.2477	1525	19.744	1635	20.3415	1441	30.9647	1950	27.9636	2114	32.0173	2100	0.895061	-0.424181	normal	--	--	Molecular Function: aspartic-type endopeptidase activity (GO:0004190);; Cellular Component: nucleus (GO:0005634);; Cellular Component: cytosol (GO:0005829);; Biological Process: protein glycosylation (GO:0006486);; Biological Process: proteolysis (GO:0006508);; Biological Process: response to cadmium ion (GO:0046686);;	K11885|0|sita:101773684|DNA damage-inducible protein 1-like; K11885 DNA damage-inducible protein 1 (A)	--	[L]	Replication, recombination and repair	Aspartyl protease;; Ubiquitin family;; Aspartyl protease;; Ubiquitin-2 like Rad60 SUMO-like;; UBA/TS-N domain;; Retroviral aspartyl protease;; Retroviral aspartyl protease	--	L	Replication, recombination and repair	PREDICTED: DNA damage-inducible protein 1-like isoform X1 [Setaria italica]
Seita.1G047000	Seita.1G047000	12.2811	567	2.76778	169	3.53378	184	5.60012	260	5.77902	320	3.73697	180	0.992981	0.232404	normal	--	--	--	--	--	--	--	--	--	--	--	PREDICTED: uncharacterized protein LOC101774350 [Setaria italica]
Seita.1G047100	Seita.1G047100	0.040126	6	0.010329	2	0.02318	4	0	0	0	0	0	0	--	--	--	--	--	Biological Process: regulation of DNA replication (GO:0006275);; Biological Process: chromatin silencing (GO:0006342);; Biological Process: regulation of G2/M transition of mitotic cell cycle (GO:0010389);; Biological Process: histone H3-K9 methylation (GO:0051567);;	--	--	--	--	--	--	S	Function unknown	PREDICTED: uncharacterized protein LOC103626829 isoform X2 [Zea mays]
Seita.1G047200	Seita.1G047200	0	0	0.019101	2	0.02072	2	0.066766	6	0.045836	5	0.093993	8	--	--	--	--	--	--	--	--	--	--	Ulp1 protease family, C-terminal catalytic domain	--	R	General function prediction only	PREDICTED: uncharacterized protein LOC101753995, partial [Setaria italica]
Seita.1G047300	Seita.1G047300	0	0	0	0	0	0	0	0	0	0	0	0	--	--	--	[L]	Replication, recombination and repair	Biological Process: telomere maintenance (GO:0000723);; Molecular Function: DNA helicase activity (GO:0003678);; Molecular Function: ATP binding (GO:0005524);; Biological Process: DNA repair (GO:0006281);; Biological Process: DNA duplex unwinding (GO:0032508);;	--	--	[D]	Cell cycle control, cell division, chromosome partitioning	PIF1-like helicase;; Helitron helicase-like domain at N-terminus;; AAA domain	--	D	Cell cycle control, cell division, chromosome partitioning	OSJNBb0066J23.21 [Oryza sativa Japonica Group]
Seita.1G047400	Seita.1G047400	2.48191	60	4.05805	128	3.11523	84	4.02931	97	4.93318	142	2.71324	68	0.999228	-0.142199	normal	[I]	Lipid transport and metabolism	Cellular Component: plasma membrane (GO:0005886);;	--	--	[I]	Lipid transport and metabolism	Putative lysophospholipase;; Alpha/beta hydrolase family;; Alpha/beta hydrolase family	Caffeoylshikimate esterase GN=CSE OS=Arabidopsis thaliana (Mouse-ear cress) PE=1 SV=1	I	Lipid transport and metabolism	PREDICTED: uncharacterized protein LOC101780690 [Setaria italica]
Seita.1G047500	Seita.1G047500	3.45582	385	2.13991	314	2.45603	308	2.30339	258	1.63815	219	1.88845	219	0.906058	0.518522	normal	--	--	Cellular Component: mitochondrion (GO:0005739);; Biological Process: sterol metabolic process (GO:0016125);; Biological Process: isopentenyl diphosphate biosynthetic process, mevalonate pathway (GO:0019287);; Biological Process: isopentenyl diphosphate biosynthetic process, methylerythritol 4-phosphate pathway (GO:0019288);; Molecular Function: poly(G) binding (GO:0034046);; Biological Process: r…	--	--	[R]	General function prediction only	PPR repeat family;; PPR repeat;; Pentatricopeptide repeat domain;; DYW family of nucleic acid deaminases;; PPR repeat	Pentatricopeptide repeat-containing protein At4g14850 OS=Arabidopsis thaliana (Mouse-ear cress) PE=1 SV=1	R	General function prediction only	PREDICTED: pentatricopeptide repeat-containing protein At4g14850-like [Setaria italica]
Seita.1G047600	Seita.1G047600	0	0	0	0	0	0	0	0	0	0	0	0	--	--	--	--	--	--	--	--	--	--	--	--	R	General function prediction only	PREDICTED: uncharacterized protein LOC101781465 [Setaria italica]
Seita.1G047700	Seita.1G047700	0	0	0	0	0	0	0	0	0	0	0	0	--	--	--	--	--	Cellular Component: cytoplasmic membrane-bounded vesicle (GO:0016023);;	--	--	--	--	Probable lipid transfer;; Protease inhibitor/seed storage/LTP family	Non-specific lipid transfer protein GPI-anchored 2 (Precursor) GN=T28A8.10 OS=Arabidopsis thaliana (Mouse-ear cress) PE=2 SV=1	R	General function prediction only	PREDICTED: uncharacterized protein LOC101767875 [Setaria italica]
Seita.1G047800	Seita.1G047800	8.34019	480	4.04404	321	4.04194	271	5.54708	317	4.74811	335	3.10653	188	0.972872	0.335379	normal	[U]	Intracellular trafficking, secretion, and vesicular transport	Molecular Function: DNA binding (GO:0003677);; Molecular Function: phospholipid binding (GO:0005543);; Cellular Component: vacuole (GO:0005773);; Cellular Component: Golgi apparatus (GO:0005794);; Cellular Component: plasma membrane (GO:0005886);; Molecular Function: ARF GTPase activator activity (GO:0008060);; Molecular Function: zinc ion binding (GO:0008270);; Biological Process: regulation of …	K12486|0|sita:101775162|ADP-ribosylation factor GTPase-activating protein AGD12-like; K12486 stromal membrane-associated protein (A)	Endocytosis (ko04144)	[R]	General function prediction only	Putative GTPase activating protein for Arf;; C2 domain	ADP-ribosylation factor GTPase-activating protein AGD12 GN=F7J7.100 OS=Arabidopsis thaliana (Mouse-ear cress) PE=1 SV=1	T	Signal transduction mechanisms	PREDICTED: ADP-ribosylation factor GTPase-activating protein AGD12-like isoform X1 [Setaria italica]
Seita.1G047900	Seita.1G047900	0	0	0	0	0	0	0.023706	1	0	0	0	0	--	--	--	--	--	--	--	--	--	--	--	--	--	--	--
Seita.1G048000	Seita.1G048000	0.621456	33	0.199849	14	0.372506	22	0.891844	47	0.911373	57	0.607375	33	--	--	--	--	--	Molecular Function: calcium ion binding (GO:0005509);; Cellular Component: cytoplasm (GO:0005737);;	K13448|6.08921e-158|sita:101775834|probable calcium-binding protein CML21-like; K13448 calcium-binding protein CML (A)	Plant-pathogen interaction (ko04626)	[T]	Signal transduction mechanisms	EF-hand domain pair;; EF hand;; EF-hand domain;; EF hand;; EF-hand domain pair;; Secreted protein acidic and rich in cysteine Ca binding region	Probable calcium-binding protein CML21 GN=CML21 OS=Arabidopsis thaliana (Mouse-ear cress) PE=2 SV=1	T	Signal transduction mechanisms	PREDICTED: probable calcium-binding protein CML21-like [Setaria italica]
Seita.1G048100	Seita.1G048100	4.16849	342	4.00916	431	3.62377	331	2.73343	226	2.57655	253	2.38481	205	0.806332	0.693585	normal	--	--	--	--	--	--	--	--	--	R	General function prediction only	PREDICTED: uncharacterized protein LOC101776234 [Setaria italica]
Seita.1G048200	Seita.1G048200	0.249746	28	0.362907	54	0.251625	32	0.89101	101	0.526268	71	0.391502	46	0.657488	-0.935548	normal	--	--	--	--	--	--	--	--	--	--	--	--
Seita.1G048300	Seita.1G048300	1.49524	36	1.51569	47	1.2318	33	1.74164	42	1.13127	32	1.30729	32	1	0.117849	normal	--	--	Cellular Component: mitochondrion (GO:0005739);; Biological Process: cellular process (GO:0009987);; Cellular Component: cytoplasmic membrane-bounded vesicle (GO:0016023);; Molecular Function: transferase activity, transferring alkyl or aryl (other than methyl) groups (GO:0016765);; Biological Process: response to stimulus (GO:0050896);;	K11778|2.02386e-85|bdi:100834321|dehydrodolichyl diphosphate syntase complex subunit NUS1-like; K11778 ditrans,polycis-polyprenyl diphosphate synthase [EC:2.5.1.87] (A)	Terpenoid backbone biosynthesis (ko00900)	--	--	--	--	S	Function unknown	PREDICTED: dehydrodolichyl diphosphate syntase complex subunit NUS1-like isoform X1 [Brachypodium distachyon]
Seita.1G048400	Seita.1G048400	10.7545	714	6.34188	555	6.23923	467	7.79138	519	7.34921	586	7.36795	510	1	0.0878734	normal	[DZ]	Cell cycle control, cell division, chromosome partitioning;; Cytoskeleton	Cellular Component: mitochondrion (GO:0005739);;	--	--	[S]	Function unknown	Regulator of chromosome condensation (RCC1) repeat;; Regulator of chromosome condensation (RCC1) repeat	Ultraviolet-B receptor UVR8 GN=UVR8 OS=Arabidopsis thaliana (Mouse-ear cress) PE=1 SV=1	S	Function unknown	PREDICTED: E3 ubiquitin-protein ligase HERC2-like [Setaria italica]
Seita.1G048500	Seita.1G048500	15.0851	976	6.1596	525	5.85738	427	7.18733	467	7.2683	565	6.03431	407	0.924781	0.390755	normal	--	--	Cellular Component: mitochondrion (GO:0005739);;	--	--	--	--	--	--	S	Function unknown	PREDICTED: uncharacterized protein LOC101777055 [Setaria italica]
Seita.1G048600	Seita.1G048600	0.50451	36	0.10626	19	0.105128	17	0.082504	11	0.054996	9	0.049749	7	--	--	--	--	--	--	--	--	--	--	--	--	--	--	--
Seita.1G048700	Seita.1G048700	0.280838	10	0.218461	11	0.088901	4	0.085262	4	0.151498	7	0.025734	1	--	--	--	--	--	--	--	--	--	--	--	--	--	--	--
Seita.1G048800	Seita.1G048800	0	0	0	0	0	0	0.134319	11	0.143563	14	0.024169	2	--	--	--	--	--	Biological Process: regulation of transcription, DNA-templated (GO:0006355);; Biological Process: anatomical structure morphogenesis (GO:0009653);; Biological Process: single-organism developmental process (GO:0044767);; Biological Process: system development (GO:0048731);;	--	--	--	--	GRAS domain family	Protein MONOCULM 1 GN=P0490F09.19 OS=Oryza sativa subsp. japonica (Rice) PE=2 SV=1	S	Function unknown	PREDICTED: protein MONOCULM 1-like [Zea mays]
Seita.1G048900	Seita.1G048900	11.3638	778	7.00229	632	6.54105	505	7.1725	493	5.97896	492	7.20442	514	0.95611	0.330109	normal	[IQ]	Lipid transport and metabolism;; Secondary metabolites biosynthesis, transport and catabolism	Biological Process: very long-chain fatty acid metabolic process (GO:0000038);; Molecular Function: fatty acid synthase activity (GO:0004312);; Cellular Component: mitochondrion (GO:0005739);; Biological Process: fatty acid biosynthetic process (GO:0006633);; Biological Process: response to cold (GO:0009409);; Biological Process: cuticle development (GO:0042335);;	K09458|0|sita:101777470|3-oxoacyl-[acyl-carrier-protein] synthase, mitochondrial-like; K09458 3-oxoacyl-[acyl-carrier-protein] synthase II [EC:2.3.1.179] (A)	Fatty acid biosynthesis (ko00061);; Biotin metabolism (ko00780);; Fatty acid metabolism (ko01212)	[IQ]	Lipid transport and metabolism;; Secondary metabolites biosynthesis, transport and catabolism	Beta-ketoacyl synthase, N-terminal domain;; Beta-ketoacyl synthase, C-terminal domain;; Thiolase, N-terminal domain	3-oxoacyl-[acyl-carrier-protein] synthase, mitochondrial (Precursor) GN=KAS OS=Arabidopsis thaliana (Mouse-ear cress) PE=1 SV=1	I	Lipid transport and metabolism	PREDICTED: 3-oxoacyl-[acyl-carrier-protein] synthase, mitochondrial-like [Setaria italica]
Seita.1G049000	Seita.1G049000	50.9835	3229	52.8681	4412	59.4622	4242	60.9744	3875	71.0556	5402	75.5183	4983	0.980822	-0.243751	normal	[Q]	Secondary metabolites biosynthesis, transport and catabolism	Molecular Function: fumarylacetoacetase activity (GO:0004334);; Cellular Component: cytosol (GO:0005829);; Biological Process: aromatic amino acid family metabolic process (GO:0009072);; Biological Process: chlorophyll catabolic process (GO:0015996);;	K01555|0|sita:101777884|fumarylacetoacetase-like; K01555 fumarylacetoacetase [EC:3.7.1.2] (A)	Tyrosine metabolism (ko00350)	[G]	Carbohydrate transport and metabolism	Fumarylacetoacetate (FAA) hydrolase family;; Fumarylacetoacetase N-terminal	--	G	Carbohydrate transport and metabolism	PREDICTED: fumarylacetoacetase-like [Setaria italica]
Seita.1G049100	Seita.1G049100	0.071914	4	0.079169	6	0.031465	2	0.035182	2	0	0	0.070935	4	--	--	--	--	--	Molecular Function: polygalacturonase activity (GO:0004650);; Cellular Component: extracellular region (GO:0005576);; Biological Process: carbohydrate metabolic process (GO:0005975);;	--	--	--	--	Glycosyl hydrolases family 28;; Pectate lyase superfamily protein;; Right handed beta helix region	Exopolygalacturonase (Precursor) GN=PG2C OS=Zea mays (Maize) PE=2 SV=1	R	General function prediction only	uncharacterized protein LOC100273946 precursor [Zea mays]
Seita.1G049200	Seita.1G049200	7.63716	1071	6.96942	1294	7.08905	1091	7.75318	1119	7.84596	1359	9.06758	1360	0.996092	-0.148683	normal	[P]	Inorganic ion transport and metabolism	Molecular Function: copper-exporting ATPase activity (GO:0004008);; Molecular Function: copper ion binding (GO:0005507);; Molecular Function: ATP binding (GO:0005524);; Cellular Component: integral component of membrane (GO:0016021);; Biological Process: copper ion export (GO:0060003);;	K17686|0|sita:101778281|putative copper-transporting ATPase HMA5-like; K17686 Cu+-exporting ATPase [EC:3.6.3.54] (A)	--	[P]	Inorganic ion transport and metabolism	E1-E2 ATPase;; haloacid dehalogenase-like hydrolase;; Heavy-metal-associated domain;; haloacid dehalogenase-like hydrolase;; haloacid dehalogenase-like hydrolase	Probable copper-transporting ATPase HMA5 GN=HMA5 OS=Arabidopsis thaliana (Mouse-ear cress) PE=1 SV=2	P	Inorganic ion transport and metabolism	PREDICTED: putative copper-transporting ATPase HMA5-like isoform X1 [Setaria italica]
Seita.1G049300	Seita.1G049300	0.078951	2	0	0	0	0	0	0	0.063617	2	0.017256	1	--	--	--	[RTKL]	General function prediction only;; Signal transduction mechanisms;; Transcription;; Replication, recombination and repair	Molecular Function: protein kinase activity (GO:0004672);; Molecular Function: ATP binding (GO:0005524);; Cellular Component: mitochondrion (GO:0005739);; Biological Process: protein phosphorylation (GO:0006468);;	--	--	[T]	Signal transduction mechanisms	Protein kinase domain	Mitogen-activated protein kinase kinase kinase 3 GN=ANP3 OS=Arabidopsis thaliana (Mouse-ear cress) PE=1 SV=1	T	Signal transduction mechanisms	PREDICTED: mitogen-activated protein kinase kinase kinase A-like [Setaria italica]
Seita.1G049400	Seita.1G049400	24.8207	2628	27.4205	3826	27.7269	3307	22.6646	2408	21.8892	2783	23.079	2546	0.954568	0.348206	normal	[M]	Cell wall/membrane/envelope biogenesis	Cellular Component: mitochondrion (GO:0005739);; Biological Process: chloroplast organization (GO:0009658);; Cellular Component: chloroplast outer membrane (GO:0009707);; Biological Process: embryo development ending in seed dormancy (GO:0009793);; Biological Process: photosystem II assembly (GO:0010207);;	K07277|0|sita:101778962|outer envelope protein 80, chloroplastic-like; K07277 outer membrane protein insertion porin family (A)	--	--	--	Surface antigen;; Surface antigen variable number repeat	Outer envelope protein 80, chloroplastic OS=Oryza sativa subsp. japonica (Rice) PE=3 SV=2	R	General function prediction only	PREDICTED: outer envelope protein 80, chloroplastic-like [Setaria italica]
Seita.1G049500	Seita.1G049500	24.6062	1259	8.95344	602	9.74303	554	20.2236	1042	18.5238	1125	15.3473	819	0.96013	-0.340475	normal	[P]	Inorganic ion transport and metabolism	Cellular Component: membrane (GO:0016020);; Biological Process: metal ion transport (GO:0030001);; Molecular Function: metal ion transmembrane transporter activity (GO:0046873);; Biological Process: transmembrane transport (GO:0055085);;	K07238|0|sita:101779369|branchy; zinc transporter ZTP29-like; K07238 zinc transporter, ZIP family (A)	--	[P]	Inorganic ion transport and metabolism	ZIP Zinc transporter	Zinc transporter ZTP29 GN=ZTP29 OS=Arabidopsis thaliana (Mouse-ear cress) PE=2 SV=1	P	Inorganic ion transport and metabolism	uncharacterized protein LOC101779369 [Setaria italica]
Seita.1G049600	Seita.1G049600	7.68867	397	9.69139	638	9.47844	538	7.95933	390	7.45514	453	5.86706	316	0.924502	0.462288	normal	[O]	Posttranslational modification, protein turnover, chaperones	--	K09529|4.57175e-153|sita:101779757|chaperone protein dnaJ 6-like; K09529 DnaJ homolog subfamily C member 9 (A)	--	[O]	Posttranslational modification, protein turnover, chaperones	DnaJ domain	Chaperone protein dnaJ 6 GN=MOJ9.8 OS=Arabidopsis thaliana (Mouse-ear cress) PE=2 SV=1	O	Posttranslational modification, protein turnover, chaperones	PREDICTED: chaperone protein dnaJ 6-like [Setaria italica]
Seita.1G049700	Seita.1G049700	111.048	4042	98.8927	4662	105.877	4254	124.084	4520	123.839	5449	92.8858	3496	1	-0.0406202	normal	--	--	Molecular Function: DNA binding (GO:0003677);; Biological Process: response to stress (GO:0006950);; Molecular Function: zinc ion binding (GO:0008270);;	--	--	[R]	General function prediction only	A20-like zinc finger;; AN1-like Zinc finger	Zinc finger A20 and AN1 domain-containing stress-associated protein 8 OS=Oryza sativa subsp. japonica (Rice) PE=2 SV=1	R	General function prediction only	PREDICTED: zinc finger A20 and AN1 domain-containing stress-associated protein 8-like isoform X1 [Setaria italica]
Seita.1G049800	Seita.1G049800	0	0	0	0	0	0	0	0	0	0	0	0	--	--	--	--	--	--	--	--	--	--	--	--	--	--	--
Seita.1G049900	Seita.1G049900	25.2218	3448	14.8938	2753	15.4062	2469	18.0183	2197	14.4388	2444	25.6129	3257	0.999228	0.112376	normal	[S]	Function unknown	Molecular Function: catalytic activity (GO:0003824);; Biological Process: metabolic process (GO:0008152);; Cellular Component: cytoplasmic membrane-bounded vesicle (GO:0016023);;	K09955|0|sita:101780837|uncharacterized LOC101780837; K09955 hypothetical protein (A)	--	--	--	Putative glycosyl hydrolase of unknown function (DUF1680)	--	R	General function prediction only	PREDICTED: uncharacterized protein LOC101780837 [Setaria italica]
Seita.1G050000	Seita.1G050000	0	0	0.053046	4	0.028029	2	0.092	5	0.018719	1	0.172576	8	--	--	--	--	--	--	--	--	[S]	Function unknown	Uncharacterized conserved protein (DUF2048)	--	S	Function unknown	PREDICTED: uncharacterized protein C4orf29 homolog isoform X1 [Setaria italica]
Seita.1G050100	Seita.1G050100	68.5775	3483	53.7464	3598	54.5932	3124	78.4872	4001	82.4671	5029	57.5597	3046	0.981967	-0.233597	normal	--	--	Molecular Function: DNA binding (GO:0003677);; Biological Process: response to stress (GO:0006950);; Molecular Function: zinc ion binding (GO:0008270);;	--	--	[R]	General function prediction only	A20-like zinc finger;; AN1-like Zinc finger	Zinc finger A20 and AN1 domain-containing stress-associated protein 4 GN=OJ1225_F07.15 OS=Oryza sativa subsp. japonica (Rice) PE=2 SV=1	R	General function prediction only	PREDICTED: zinc finger A20 and AN1 domain-containing stress-associated protein 4-like [Setaria italica]
Seita.1G050200	Seita.1G050200	4.5228	497	4.92913	689	6.20076	796	10.6088	1088	6.74966	880	4.86614	546	0.948896	-0.316647	normal	--	--	Cellular Component: cytoplasmic membrane-bounded vesicle (GO:0016023);;	K09955|1.05216e-55|sita:101780837|uncharacterized LOC101780837; K09955 hypothetical protein (A)	--	--	--	Putative glycosyl hydrolase of unknown function (DUF1680)	--	S	Function unknown	PREDICTED: uncharacterized protein LOC101780837 [Setaria italica]
Seita.1G050300	Seita.1G050300	1.26142	108	0.515649	58	0.484681	47	0.277122	24	0.468597	48	0.285076	26	0.481622	1.10615	normal	--	--	--	--	--	[S]	Function unknown	Uncharacterized conserved protein (DUF2048);; Alpha/beta hydrolase family;; Alpha/beta hydrolase family;; alpha/beta hydrolase fold	--	S	Function unknown	PREDICTED: uncharacterized protein C4orf29 homolog isoform X1 [Setaria italica]
Seita.1G050400	Seita.1G050400	10.423	978	5.18289	648	5.85335	623	6.97257	662	8.2234	927	6.47319	640	1	0.00508451	normal	--	--	Biological Process: transcription, DNA-templated (GO:0006351);;	K14431|0|sita:101782038|transcription factor TGA2-like; K14431 transcription factor TGA (A)	Plant hormone signal transduction (ko04075)	--	--	Seed dormancy control;; bZIP transcription factor;; Basic region leucine zipper	Transcription factor HBP-1b(c1) (Fragment) OS=Triticum aestivum (Wheat) PE=1 SV=2	S	Function unknown	PREDICTED: transcription factor TGA2-like isoform X1 [Setaria italica]
Seita.1G050500	Seita.1G050500	0	0	0	0	0	0	0	0	0	0	0	0	--	--	--	--	--	--	--	--	--	--	Protein of unknown function (DUF1618)	--	S	Function unknown	PREDICTED: uncharacterized protein LOC101772341 [Setaria italica]
Seita.1G050600	Seita.1G050600	12.0129	1045	9.90465	1136	9.61161	942	14.6799	1282	11.0752	1157	13.6553	1238	0.981967	-0.245433	normal	--	--	Biological Process: cell morphogenesis (GO:0000902);;	K16810|0|sita:101783661|TBCC domain-containing protein 1-like; K16810 TBCC domain-containing protein 1 (A)	--	[S]	Function unknown	Tubulin binding cofactor C	--	S	Function unknown	PREDICTED: TBCC domain-containing protein 1-like [Setaria italica]
Seita.1G050700	Seita.1G050700	744.058	97286	279.067	48086	354.302	52179	341.777	44846	384.352	60332	470.891	64144	0.999228	0.193726	normal	--	--	Molecular Function: iron ion binding (GO:0005506);; Cellular Component: chloroplast (GO:0009507);; Molecular Function: linoleate 13S-lipoxygenase activity (GO:0016165);; Biological Process: oxylipin biosynthetic process (GO:0031408);; Biological Process: oxidation-reduction process (GO:0055114);;	K00454|0|sita:101784066|lipoxygenase 2.3, chloroplastic-like; K00454 lipoxygenase [EC:1.13.11.12] (A)	Linoleic acid metabolism (ko00591);; alpha-Linolenic acid metabolism (ko00592)	--	--	Lipoxygenase;; PLAT/LH2 domain	Lipoxygenase 2.3, chloroplastic (Precursor) GN=LOX2.3 OS=Hordeum vulgare (Barley) PE=1 SV=1	E	Amino acid transport and metabolism	PREDICTED: lipoxygenase 2.3, chloroplastic-like [Setaria italica]
Seita.1G050800	Seita.1G050800	0.06759	7	0.206567	28	0.199364	24	0.886499	92	0.712485	88	0.726446	78	0.0227984	-2.08865	normal	[RTKL]	General function prediction only;; Signal transduction mechanisms;; Transcription;; Replication, recombination and repair	Molecular Function: protein serine/threonine kinase activity (GO:0004674);; Molecular Function: protein tyrosine kinase activity (GO:0004713);; Molecular Function: ATP binding (GO:0005524);; Biological Process: protein phosphorylation (GO:0006468);; Biological Process: transmembrane receptor protein tyrosine kinase signaling pathway (GO:0007169);; Cellular Component: integral component of membran…	--	--	[T]	Signal transduction mechanisms	Protein kinase domain;; Protein tyrosine kinase;; Leucine rich repeat;; Leucine Rich repeats (2 copies);; Leucine Rich Repeat;; Leucine Rich repeat;; Leucine rich repeat	Protein STRUBBELIG-RECEPTOR FAMILY 8 (Precursor) GN=SRF8 OS=Arabidopsis thaliana (Mouse-ear cress) PE=2 SV=1	T	Signal transduction mechanisms	hypothetical protein SORBIDRAFT_04g006475 [Sorghum bicolor]
Seita.1G050900	Seita.1G050900	0.002472	1	0	0	0.002341	1	0	0	0.002059	1	0	0	--	--	--	[S]	Function unknown	Molecular Function: protein serine/threonine kinase activity (GO:0004674);; Molecular Function: protein tyrosine kinase activity (GO:0004713);; Molecular Function: ATP binding (GO:0005524);; Biological Process: protein phosphorylation (GO:0006468);; Biological Process: megasporogenesis (GO:0009554);; Biological Process: microsporogenesis (GO:0009556);; Cellular Component: membrane (GO:0016020);; …	--	--	--	--	Leucine Rich repeats (2 copies);; Protein tyrosine kinase;; Protein kinase domain;; Leucine rich repeat;; Leucine Rich Repeat;; Leucine Rich repeat;; Leucine rich repeat;; Leucine rich repeat N-terminal domain	Leucine-rich repeat receptor-like serine/threonine-protein kinase At1g17230 (Precursor) GN=At1g17230 OS=Arabidopsis thaliana (Mouse-ear cress) PE=2 SV=2	T	Signal transduction mechanisms	PREDICTED: leucine-rich repeat receptor protein kinase EXS-like [Setaria italica]
Seita.1G051000	Seita.1G051000	1.56076	198	0.61825	104	0.373275	54	0.931995	119	0.701527	106	0.520522	70	0.993602	0.21452	normal	[S]	Function unknown	Molecular Function: protein serine/threonine kinase activity (GO:0004674);; Molecular Function: protein tyrosine kinase activity (GO:0004713);; Molecular Function: ATP binding (GO:0005524);; Biological Process: protein phosphorylation (GO:0006468);; Cellular Component: plastid (GO:0009536);; Biological Process: megasporogenesis (GO:0009554);; Biological Process: microsporogenesis (GO:0009556);; C…	--	--	--	--	Leucine Rich repeats (2 copies);; Leucine rich repeat;; Leucine Rich Repeat;; Leucine Rich repeat;; Leucine rich repeat	Leucine-rich repeat receptor protein kinase EXS (Precursor) GN=T28J14.220 OS=Arabidopsis thaliana (Mouse-ear cress) PE=1 SV=1	T	Signal transduction mechanisms	PREDICTED: leucine-rich repeat receptor protein kinase EXS-like [Setaria italica]
Seita.1G051100	Seita.1G051100	7.53523	450	7.18434	566	7.97047	537	8.66012	519	6.54993	470	6.3428	395	0.999228	0.174982	normal	--	--	Cellular Component: nucleus (GO:0005634);; Biological Process: DNA repair (GO:0006281);; Cellular Component: Smc5-Smc6 complex (GO:0030915);;	--	--	[S]	Function unknown	Nse4 C-terminal	Non-structural maintenance of chromosomes element 4 homolog A GN=NSE4A OS=Arabidopsis thaliana (Mouse-ear cress) PE=2 SV=1	S	Function unknown	PREDICTED: non-structural maintenance of chromosome element 4-like isoform X1 [Setaria italica]
Seita.1G051200	Seita.1G051200	10.2409	551	4.60409	353	4.51867	304	8.38205	477	7.01694	539	6.91664	434	0.98388	-0.286729	normal	--	--	Molecular Function: DNA binding (GO:0003677);; Molecular Function: RNA binding (GO:0003723);; Molecular Function: metal ion binding (GO:0046872);;	--	--	[R]	General function prediction only	Zinc finger C-x8-C-x5-C-x3-H type (and similar);; KH domain;; Zinc finger C-x8-C-x5-C-x3-H type;; KH domain	Zinc finger CCCH domain-containing protein 14 OS=Oryza sativa subsp. japonica (Rice) PE=2 SV=1	R	General function prediction only	PREDICTED: zinc finger CCCH domain-containing protein 14-like [Setaria italica]
Seita.1G051300	Seita.1G051300	38.1384	2753	29.3768	2795	29.8368	2426	35.5853	2578	31.5489	2734	42.0886	3165	0.999703	-0.0978037	normal	[C]	Energy production and conversion	Molecular Function: citrate (Si)-synthase activity (GO:0004108);; Molecular Function: ATP binding (GO:0005524);; Cellular Component: cell wall (GO:0005618);; Cellular Component: mitochondrion (GO:0005739);; Biological Process: tricarboxylic acid cycle (GO:0006099);; Molecular Function: zinc ion binding (GO:0008270);; Cellular Component: chloroplast (GO:0009507);; Biological Process: cellular carb…	K01647|0|sita:101786364|citrate synthase 4, mitochondrial-like; K01647 citrate synthase [EC:2.3.3.1] (A)	Citrate cycle (TCA cycle) (ko00020);; Glyoxylate and dicarboxylate metabolism (ko00630);; Carbon metabolism (ko01200);; 2-Oxocarboxylic acid metabolism (ko01210);; Biosynthesis of amino acids (ko01230)	[C]	Energy production and conversion	Citrate synthase	Citrate synthase 4, mitochondrial (Precursor) GN=CSY4 OS=Arabidopsis thaliana (Mouse-ear cress) PE=1 SV=3	C	Energy production and conversion	PREDICTED: citrate synthase 4, mitochondrial-like isoform X2 [Setaria italica]
Seita.1G051400	Seita.1G051400	0	0	0	0	0	0	0	0	0	0	0	0	--	--	--	--	--	--	--	--	--	--	F-box-like;; F-box domain	Putative F-box/LRR-repeat protein At3g59160 GN=At3g59160 OS=Arabidopsis thaliana (Mouse-ear cress) PE=3 SV=1	R	General function prediction only	PREDICTED: putative F-box/FBD/LRR-repeat protein At5g44950-like [Setaria italica]
Seita.1G051500	Seita.1G051500	0.02925	1	0	0	0	0	0	0	0	0	0	0	--	--	--	--	--	--	--	--	--	--	F-box domain	Putative FBD-associated F-box protein At5g56820 GN=At5g56820 OS=Arabidopsis thaliana (Mouse-ear cress) PE=3 SV=2	R	General function prediction only	PREDICTED: uncharacterized protein LOC101773976 [Setaria italica]
Seita.1G051600	Seita.1G051600	0	0	0	0	0	0	0	0	0	0	0	0	--	--	--	--	--	--	--	--	--	--	--	--	--	--	--
Seita.1G051700	Seita.1G051700	10.6496	881	8.07697	880	7.86428	733	7.75566	644	9.81444	974	10.2647	884	1	-0.00499822	normal	[T]	Signal transduction mechanisms	Molecular Function: protein serine/threonine phosphatase activity (GO:0004722);; Cellular Component: plasma membrane (GO:0005886);; Biological Process: protein dephosphorylation (GO:0006470);; Cellular Component: integral component of membrane (GO:0016021);; Molecular Function: metal ion binding (GO:0046872);;	--	--	[T]	Signal transduction mechanisms	Protein phosphatase 2C	Probable protein phosphatase 2C 72 OS=Oryza sativa subsp. japonica (Rice) PE=2 SV=1	T	Signal transduction mechanisms	PREDICTED: probable protein phosphatase 2C 72-like [Setaria italica]
Seita.1G051800	Seita.1G051800	17.3145	952	15.2666	1106	13.2696	822	15.297	844	15.2786	1009	14.1116	809	0.999228	0.11287	normal	[S]	Function unknown	Cellular Component: endoplasmic reticulum (GO:0005783);; Cellular Component: membrane (GO:0016020);;	--	--	[S]	Function unknown	YIF1	--	S	Function unknown	PREDICTED: protein YIF1B-B-like isoform X2 [Setaria italica]
Seita.1G051900	Seita.1G051900	5.53007	447	5.04755	522	5.64906	504	4.87557	389	4.42197	417	4.22533	352	0.966567	0.357079	normal	[BK]	Chromatin structure and dynamics;; Transcription	Molecular Function: DNA binding (GO:0003677);; Molecular Function: chromatin binding (GO:0003682);; Biological Process: chromatin remodeling (GO:0006338);; Cellular Component: plastid (GO:0009536);; Cellular Component: SWI/SNF complex (GO:0016514);; Biological Process: regulation of gene expression, epigenetic (GO:0040029);; Biological Process: photoperiodism, flowering (GO:0048573);;	K11649|0|sita:101753541|SWI/SNF complex subunit SWI3B-like; K11649 SWI/SNF related-matrix-associated actin-dependent regulator of chromatin subfamily C (A)	--	[B]	Chromatin structure and dynamics	SWIRM domain;; Myb-like DNA-binding domain;; Myb-like DNA-binding domain	SWI/SNF complex subunit SWI3B GN=F4P9.38 OS=Arabidopsis thaliana (Mouse-ear cress) PE=1 SV=1	B	Chromatin structure and dynamics	PREDICTED: SWI/SNF complex subunit SWI3B-like [Setaria italica]
Seita.1G052000	Seita.1G052000	20.3076	1035	22.0231	1479	26.2495	1507	28.9027	1478	28.6607	1753	30.9186	1641	0.970981	-0.255877	normal	--	--	Biological Process: MAPK cascade (GO:0000165);; Biological Process: respiratory burst involved in defense response (GO:0002679);; Molecular Function: sequence-specific DNA binding transcription factor activity (GO:0003700);; Cellular Component: endoplasmic reticulum membrane (GO:0005789);; Biological Process: regulation of transcription, DNA-templated (GO:0006355);; Biological Process: protein ta…	--	--	--	--	Basic region leucine zipper;; bZIP transcription factor	bZIP transcription factor 60 GN=BZIP60 OS=Arabidopsis thaliana (Mouse-ear cress) PE=2 SV=1	S	Function unknown	PREDICTED: bZIP transcription factor 60-like [Setaria italica]
Seita.1G052100	Seita.1G052100	2.69421	234	2.03789	235	2.29074	224	3.05635	266	2.46172	256	1.93734	177	1	-0.00846201	normal	--	--	Biological Process: regulation of vernalization response (GO:0010219);; Cellular Component: mediator complex (GO:0016592);; Biological Process: negative regulation of transcription, DNA-templated (GO:0045892);; Biological Process: carpel development (GO:0048440);; Biological Process: petal development (GO:0048441);; Biological Process: sepal development (GO:0048442);; Biological Process: stamen d…	K15135|3.31202e-140|sita:101754358|mediator of RNA polymerase II transcription subunit 18-like; K15135 mediator of RNA polymerase II transcription subunit 18 (A)	--	[S]	Function unknown	Med18 protein	Mediator of RNA polymerase II transcription subunit 18 GN=F14M13.23 OS=Arabidopsis thaliana (Mouse-ear cress) PE=1 SV=1	K	Transcription	PREDICTED: mediator of RNA polymerase II transcription subunit 18-like [Setaria italica]
Seita.1G052200	Seita.1G052200	0.062804	12	0.065471	17	0.111734	24	0.129183	25	0.085772	20	0.119318	24	--	--	--	[Z]	Cytoskeleton	Biological Process: mitotic cell cycle (GO:0000278);; Biological Process: cytokinesis by cell plate formation (GO:0000911);; Molecular Function: microtubule motor activity (GO:0003777);; Molecular Function: ATP binding (GO:0005524);; Cellular Component: kinesin complex (GO:0005871);; Cellular Component: microtubule (GO:0005874);; Biological Process: methylation-dependent chromatin silencing (GO:0…	K10400|0|sita:101754758|kinesin-like protein KIF15-like; K10400 kinesin family member 15 (A)	--	[Z]	Cytoskeleton	Kinesin motor domain;; Kinesin motor	Phragmoplast orienting kinesin 2 GN=POK2 OS=Arabidopsis thaliana (Mouse-ear cress) PE=2 SV=1	Z	Cytoskeleton	PREDICTED: kinesin-like protein KIF15-like [Setaria italica]
Seita.1G052300	Seita.1G052300	0.06616	14	0.083284	23	0.178226	42	0.037718	8	0.063802	17	0.109179	24	--	--	--	--	--	--	--	--	--	--	--	--	--	--	PREDICTED: uncharacterized protein LOC101775376 [Setaria italica]
Seita.1G052400	Seita.1G052400	2.35744	543	2.88292	874	2.82781	733	4.08311	943	3.39996	939	4.42418	1060	0.881343	-0.444702	normal	[R]	General function prediction only	Molecular Function: ARF guanyl-nucleotide exchange factor activity (GO:0005086);; Cellular Component: chloroplast (GO:0009507);; Biological Process: regulation of ARF protein signal transduction (GO:0032012);;	K18442|0|sita:101755441|brefeldin A-inhibited guanine nucleotide-exchange protein 1-like; K18442 brefeldin A-inhibited guanine nucleotide-exchange protein (A)	Endocytosis (ko04144)	[U]	Intracellular trafficking, secretion, and vesicular transport	Sec7 domain;; Guanine nucleotide exchange factor in Golgi transport N-terminal;; Domain of unknown function (DUF1981)	Brefeldin A-inhibited guanine nucleotide-exchange protein 1 GN=BIG1 OS=Arabidopsis thaliana (Mouse-ear cress) PE=2 SV=1	U	Intracellular trafficking, secretion, and vesicular transport	PREDICTED: brefeldin A-inhibited guanine nucleotide-exchange protein 1-like [Setaria italica]
Seita.1G052500	Seita.1G052500	0.019275	1	0.130775	5	0	0	0.803147	19	1.75343	49	0.791963	20	--	--	--	--	--	--	--	--	--	--	--	--	S	Function unknown	hypothetical protein SORBIDRAFT_04g006375 [Sorghum bicolor]
Seita.1G052600	Seita.1G052600	0	0	0	0	0.060357	4	0	0	0.004901	1	0	0	--	--	--	--	--	Biological Process: microtubule cytoskeleton organization (GO:0000226);; Cellular Component: kinetochore (GO:0000776);; Biological Process: cytokinesis by cell plate formation (GO:0000911);; Biological Process: DNA replication initiation (GO:0006270);; Biological Process: regulation of DNA replication (GO:0006275);; Biological Process: mitotic spindle assembly checkpoint (GO:0007094);; Biological…	K02178|0|sita:101755855|probable inactive serine/threonine-protein kinase bub1-like; K02178 checkpoint serine/threonine-protein kinase [EC:2.7.11.1] (A)	--	[D]	Cell cycle control, cell division, chromosome partitioning	Mad3/BUB1 homology region 1	Mitotic spindle checkpoint protein BUBR1 GN=F4P9.33 OS=Arabidopsis thaliana (Mouse-ear cress) PE=1 SV=2	D	Cell cycle control, cell division, chromosome partitioning	PREDICTED: probable inactive serine/threonine-protein kinase bub1-like [Setaria italica]
Seita.1G052700	Seita.1G052700	27.0909	1033	13.6742	687	14.8044	636	21.3329	816	19.6823	901	27.7554	1102	0.979084	-0.28668	normal	--	--	Cellular Component: mitochondrion (GO:0005739);;	--	--	--	--	--	--	S	Function unknown	PREDICTED: uncharacterized protein LOC101756255 [Setaria italica]
Seita.1G052800	Seita.1G052800	0	0	0	0	0	0	0	0	0	0	0	0	--	--	--	--	--	--	--	--	--	--	PLATZ transcription factor	--	S	Function unknown	PREDICTED: uncharacterized protein LOC103626867 [Zea mays]
Seita.1G052900	Seita.1G052900	0	0	0	0	0	0	0	0	0	0	0	0	--	--	--	--	--	--	--	--	--	--	PLATZ transcription factor	--	S	Function unknown	hypothetical protein SORBIDRAFT_04g006320 [Sorghum bicolor]
Seita.1G053000	Seita.1G053000	0	0	0	0	0	0	0	0	0	0	0	0	--	--	--	--	--	--	--	--	--	--	PLATZ transcription factor	--	S	Function unknown	hypothetical protein SORBIDRAFT_04g006330 [Sorghum bicolor]
Seita.1G053100	Seita.1G053100	0.007278	2	0	0	0	0	0.025021	4	0.034313	6	0.037561	6	--	--	--	--	--	--	--	--	[T]	Signal transduction mechanisms	NB-ARC domain;; Leucine Rich repeats (2 copies);; AAA domain	Putative disease resistance protein At1g50180 GN=At1g50180 OS=Arabidopsis thaliana (Mouse-ear cress) PE=3 SV=2	T	Signal transduction mechanisms	PREDICTED: putative disease resistance RPP13-like protein 3-like [Setaria italica]
Seita.1G053200	Seita.1G053200	0	0	0	0	0	0	0	0	0	0	0	0	--	--	--	--	--	--	--	--	--	--	PLATZ transcription factor	--	S	Function unknown	PREDICTED: uncharacterized protein LOC101775185 [Setaria italica]
Seita.1G053300	Seita.1G053300	0	0	0	0	0	0	0	0	0	0	0	0	--	--	--	--	--	Cellular Component: mitochondrion (GO:0005739);;	--	--	--	--	Domain of unknown function (DUF4228)	--	S	Function unknown	PREDICTED: uncharacterized protein LOC101757068 [Setaria italica]
Seita.1G053400	Seita.1G053400	0	0	0	0	0	0	0	0	0	0	0	0	--	--	--	--	--	Molecular Function: nucleic acid binding (GO:0003676);; Molecular Function: zinc ion binding (GO:0008270);;	--	--	--	--	--	--	--	--	PREDICTED: golgin subfamily A member 6-like protein 1 [Zea mays]
Seita.1G053500	Seita.1G053500	0.500762	34	1.46324	130	2.2945	174	2.2912	155	3.51814	284	6.84763	479	0.415437	-1.38738	normal	--	--	Cellular Component: mitochondrion (GO:0005739);;	--	--	--	--	Domain of unknown function (DUF4228)	--	S	Function unknown	PREDICTED: uncharacterized protein LOC101757461 [Setaria italica]
Seita.1G053600	Seita.1G053600	0.728109	61	0.479613	53	0.366672	35	4.36122	294	1.10132	110	7.16406	504	0.14803	-2.675	normal	--	--	Cellular Component: mitochondrion (GO:0005739);;	--	--	--	--	Domain of unknown function (DUF4228)	--	S	Function unknown	PREDICTED: uncharacterized protein LOC101757858 [Setaria italica]
Seita.1G053700	Seita.1G053700	3.19237	50	0.883873	18	0.987436	18	2.00473	31	1.39216	26	2.65248	43	--	--	--	--	--	--	--	--	--	--	--	--	--	--	PREDICTED: uncharacterized protein LOC101758682 [Setaria italica]
Seita.1G053800	Seita.1G053800	19.5188	1682	6.00305	682	10.3656	1006	17.5701	1520	16.6442	1722	37.3137	3350	0.561965	-1.00891	normal	[RTKL]	General function prediction only;; Signal transduction mechanisms;; Transcription;; Replication, recombination and repair	Molecular Function: protein kinase activity (GO:0004672);; Molecular Function: ATP binding (GO:0005524);; Cellular Component: mitochondrion (GO:0005739);; Cellular Component: plasma membrane (GO:0005886);; Biological Process: protein phosphorylation (GO:0006468);; Molecular Function: chitin binding (GO:0008061);; Biological Process: response to chitin (GO:0010200);; Cellular Component: cytoplasmi…	--	--	--	--	Protein tyrosine kinase;; Protein kinase domain;; LysM domain	Protein LYK5 (Precursor) GN=LYK5 OS=Arabidopsis thaliana (Mouse-ear cress) PE=2 SV=1	T	Signal transduction mechanisms	PREDICTED: protein LYK5-like [Setaria italica]
Seita.1G053900	Seita.1G053900	67.3297	3093	33.2021	2010	39.5186	2045	18.3917	848	17.7948	982	16.4925	790	0.0261964	1.43468	normal	[O]	Posttranslational modification, protein turnover, chaperones	Molecular Function: peroxidase activity (GO:0004601);; Cellular Component: plant-type cell wall (GO:0009505);; Cellular Component: chloroplast stroma (GO:0009570);; Cellular Component: thylakoid (GO:0009579);; Biological Process: defense response to bacterium (GO:0042742);; Molecular Function: peroxiredoxin activity (GO:0051920);; Biological Process: oxidation-reduction process (GO:0055114);;	--	--	[O]	Posttranslational modification, protein turnover, chaperones	Redoxin;; AhpC/TSA family	Peroxiredoxin-2E-2, chloroplastic (Precursor) OS=Oryza sativa subsp. japonica (Rice) PE=1 SV=1	O	Posttranslational modification, protein turnover, chaperones	PREDICTED: peroxiredoxin-2E-2, chloroplastic-like [Setaria italica]
Seita.1G054000	Seita.1G054000	0.012353	1	0	0	0	0	0	0	0.06174	7	0.093638	8	--	--	--	[M]	Cell wall/membrane/envelope biogenesis	Cellular Component: Golgi membrane (GO:0000139);; Cellular Component: integral component of membrane (GO:0016021);; Molecular Function: glucomannan 4-beta-mannosyltransferase activity (GO:0047259);; Molecular Function: mannan synthase activity (GO:0051753);;	K13680|0|sita:101759496|glucomannan 4-beta-mannosyltransferase 1-like; K13680 beta-mannan synthase [EC:2.4.1.32] (A)	--	--	--	Glycosyltransferase like family 2;; Glycosyl transferase family group 2;; Glycosyl transferase family 2;; Glycosyl transferase family 21	Glucomannan 4-beta-mannosyltransferase 1 OS=Oryza sativa subsp. japonica (Rice) PE=3 SV=1	R	General function prediction only	PREDICTED: glucomannan 4-beta-mannosyltransferase 1-like [Setaria italica]
Seita.1G054100	Seita.1G054100	3.09384	776	2.60181	860	2.37293	671	2.80338	706	2.669	810	3.92725	1027	0.999228	-0.152621	normal	--	--	Molecular Function: histone acetyltransferase activity (GO:0004402);; Cellular Component: nucleus (GO:0005634);; Biological Process: regulation of transcription, DNA-templated (GO:0006355);; Biological Process: cell adhesion (GO:0007155);; Molecular Function: zinc ion binding (GO:0008270);; Molecular Function: methyl-CpG binding (GO:0008327);; Cellular Component: plasmodesma (GO:0009506);; Biolog…	--	--	--	--	PHD-finger;; F/Y rich C-terminus;; WSTF, HB1, Itc1p, MBD9 motif 1;; Bromodomain;; F/Y-rich N-terminus	Methyl-CpG-binding domain-containing protein 9 GN=MBD9 OS=Arabidopsis thaliana (Mouse-ear cress) PE=2 SV=1	R	General function prediction only	PREDICTED: LOW QUALITY PROTEIN: methyl-CpG-binding domain-containing protein 9-like [Setaria italica]
Seita.1G054200	Seita.1G054200	9.90067	773	6.59403	678	7.49282	659	9.74485	763	8.66336	812	10.2228	831	0.993602	-0.196917	normal	--	--	--	--	--	--	--	--	Protein FLX-like 2 GN=F5A8.8 OS=Arabidopsis thaliana (Mouse-ear cress) PE=1 SV=1	R	General function prediction only	PREDICTED: stress response protein NST1-like [Setaria italica]
Seita.1G054300	Seita.1G054300	0	0	0.114639	4	0	0	0.150293	4	0.250843	8	0.181265	5	--	--	--	--	--	--	--	--	--	--	--	--	S	Function unknown	PREDICTED: uncharacterized protein LOC101761125 [Setaria italica]
Seita.1G054400	Seita.1G054400	30.2975	1365	7.82373	465	6.04401	307	6.43083	291	7.57465	410	8.9922	423	0.813272	0.858192	normal	--	--	Cellular Component: plastid (GO:0009536);; Cellular Component: cytoplasmic membrane-bounded vesicle (GO:0016023);;	--	--	--	--	--	--	S	Function unknown	PREDICTED: protein GLUTAMINE DUMPER 4-like [Setaria italica]
Seita.1G054500	Seita.1G054500	4.14869	482	2.2082	338	2.42697	318	4.47108	521	3.7409	521	3.80386	460	0.941475	-0.418916	normal	--	--	Molecular Function: calcium ion binding (GO:0005509);; Cellular Component: mitochondrion (GO:0005739);;	K11583|0|sita:101761912|serine/threonine-protein phosphatase 2A regulatory subunit B'' subunit beta-like; K11583 serine/threonine-protein phosphatase 2A regulatory subunit B'' (A)	mRNA surveillance pathway (ko03015)	[A]	RNA processing and modification	EF-hand domain pair;; EF-hand domain pair;; EF-hand domain	Probable serine/threonine protein phosphatase 2A regulatory subunit B&apos;&apos;gamma GN=B&apos;&apos;GAMMA OS=Arabidopsis thaliana (Mouse-ear cress) PE=1 SV=1	A	RNA processing and modification	PREDICTED: serine/threonine-protein phosphatase 2A regulatory subunit B&apos;&apos; subunit beta-like [Setaria italica]
Seita.1G054600	Seita.1G054600	0.013981	1	0	0	0	0	0	0	0.00521	1	0	0	--	--	--	--	--	Molecular Function: sequence-specific DNA binding transcription factor activity (GO:0003700);; Biological Process: regulation of transcription, DNA-templated (GO:0006355);; Molecular Function: sequence-specific DNA binding (GO:0043565);;	--	--	--	--	bZIP transcription factor;; Basic region leucine zipper	--	S	Function unknown	hypothetical protein [Oryza sativa Japonica Group]
Seita.1G054700	Seita.1G054700	2.95925	193	1.89456	163	2.31956	171	1.67628	110	1.94348	152	1.8881	129	0.965588	0.434762	normal	--	--	--	--	--	[O]	Posttranslational modification, protein turnover, chaperones	Ring finger domain;; RING-H2 zinc finger;; Zinc finger, C3HC4 type (RING finger)	E3 ubiquitin-protein ligase RING1-like GN=At3g19950 OS=Arabidopsis thaliana (Mouse-ear cress) PE=1 SV=1	O	Posttranslational modification, protein turnover, chaperones	PREDICTED: E3 ubiquitin-protein ligase CIP8-like [Setaria italica]
Seita.1G054800	Seita.1G054800	1.71609	151	1.84077	213	1.57271	156	0.734066	65	1.17499	124	1.58074	145	0.889995	0.642751	normal	[E]	Amino acid transport and metabolism	Cellular Component: vacuole (GO:0005773);; Cellular Component: plasma membrane (GO:0005886);; Cellular Component: integral component of membrane (GO:0016021);;	K14207|0|sita:101762734|sodium-coupled neutral amino acid transporter 5-like; K14207 solute carrier family 38 (sodium-coupled neutral amino acid transporter), member 2 (A)	--	[E]	Amino acid transport and metabolism	Transmembrane amino acid transporter protein;; Tryptophan/tyrosine permease family	--	E	Amino acid transport and metabolism	PREDICTED: sodium-coupled neutral amino acid transporter 5-like [Setaria italica]
Seita.1G054900	Seita.1G054900	7.01469	507	6.25737	595	5.44432	443	5.75307	417	6.04895	524	3.64561	274	0.965651	0.356668	normal	--	--	Biological Process: vernalization response (GO:0010048);;	K16750|5.80637e-79|sita:101763142|biogenesis of lysosome-related organelles complex 1 subunit 2-like; K16750 biogenesis of lysosome-related organelles complex 1 subunit 2 (A)	--	[H]	Coenzyme transport and metabolism	Biogenesis of lysosome-related organelles complex-1 subunit 2	Biogenesis of lysosome-related organelles complex 1 subunit 2 GN=BLOS2 OS=Arabidopsis thaliana (Mouse-ear cress) PE=1 SV=1	H	Coenzyme transport and metabolism	PREDICTED: biogenesis of lysosome-related organelles complex 1 subunit 2-like [Setaria italica]
Seita.1G055000	Seita.1G055000	11.8232	784	18.3565	1604	19.1677	1432	16.821	1119	14.7976	1178	13.3345	921	0.981967	0.27612	normal	[R]	General function prediction only	Biological Process: proteolysis (GO:0006508);; Molecular Function: peptidase activity (GO:0008233);; Cellular Component: plastid (GO:0009536);;	--	--	[R]	General function prediction only	Alpha/beta hydrolase family;; Alpha/beta hydrolase family;; alpha/beta hydrolase fold;; Prolyl oligopeptidase family	--	R	General function prediction only	PREDICTED: alpha/beta hydrolase domain-containing protein 17C-like [Setaria italica]
Seita.1G055100	Seita.1G055100	0	0	0	0	0	0	0	0	0	0	0	0	--	--	--	--	--	--	--	--	--	--	--	--	R	General function prediction only	PREDICTED: uncharacterized protein LOC101775993 [Setaria italica]
Seita.1G055200	Seita.1G055200	33.6969	1905	64.3941	4797	63.5585	4047	34.6888	1968	29.4194	1997	31.7629	1871	0.481622	0.908767	normal	--	--	Cellular Component: plastid (GO:0009536);; Biological Process: carotenoid biosynthetic process (GO:0016117);; Biological Process: carotene biosynthetic process (GO:0016120);; Molecular Function: oxidoreductase activity, acting on paired donors, with incorporation or reduction of molecular oxygen (GO:0016705);; Molecular Function: lycopene beta cyclase activity (GO:0045436);;	K06443|0|sita:101763950|lycopene beta cyclase, chloroplastic-like; K06443 lycopene beta-cyclase [EC:5.5.1.19] (A)	Carotenoid biosynthesis (ko00906)	--	--	Lycopene cyclase protein;; FAD dependent oxidoreductase	Lycopene beta cyclase, chloroplastic (Precursor) GN=F14P13.17 OS=Arabidopsis thaliana (Mouse-ear cress) PE=2 SV=1	H	Coenzyme transport and metabolism	PREDICTED: lycopene beta cyclase, chloroplastic-like [Setaria italica]
Seita.1G055300	Seita.1G055300	0.444481	51	0.276225	42	0.394417	51	0.12128	14	0.099008	14	0.094934	12	--	--	--	[RTKL]	General function prediction only;; Signal transduction mechanisms;; Transcription;; Replication, recombination and repair	Molecular Function: protein kinase activity (GO:0004672);; Molecular Function: ATP binding (GO:0005524);; Cellular Component: plasma membrane (GO:0005886);; Biological Process: protein phosphorylation (GO:0006468);; Cellular Component: integral component of membrane (GO:0016021);; Cellular Component: cytoplasmic membrane-bounded vesicle (GO:0016023);;	--	--	--	--	Protein kinase domain;; Protein tyrosine kinase;; Leucine Rich repeats (2 copies);; Leucine rich repeat;; Leucine Rich Repeat;; Leucine Rich repeat;; Leucine rich repeat;; Leucine rich repeat N-terminal domain	Protein STRUBBELIG-RECEPTOR FAMILY 8 (Precursor) GN=SRF8 OS=Arabidopsis thaliana (Mouse-ear cress) PE=2 SV=1	T	Signal transduction mechanisms	PREDICTED: protein STRUBBELIG-RECEPTOR FAMILY 8-like [Setaria italica]
Seita.1G055400	Seita.1G055400	10.9672	384	6.24242	288	5.80198	229	8.80763	310	9.30992	392	7.80438	285	0.999228	-0.146122	normal	--	--	Molecular Function: translation initiation factor activity (GO:0003743);; Biological Process: translational initiation (GO:0006413);; Biological Process: protein targeting to mitochondrion (GO:0006626);;	K15025|1.54306e-97|sita:101764763|probable RNA-binding protein EIF1AD-like; K15025 probable RNA-binding protein EIF1AD (A)	--	[J]	Translation, ribosomal structure and biogenesis	Translation initiation factor 1A / IF-1	--	J	Translation, ribosomal structure and biogenesis	PREDICTED: probable RNA-binding protein EIF1AD-like [Setaria italica]
Seita.1G055500	Seita.1G055500	16.3846	2827	3.46217	788	3.19246	621	4.32789	750	5.41018	1121	4.65448	837	0.933379	0.583295	normal	[V]	Defense mechanisms	Molecular Function: ATP binding (GO:0005524);; Cellular Component: plasma membrane (GO:0005886);; Biological Process: ATP catabolic process (GO:0006200);; Biological Process: auxin efflux (GO:0010315);; Molecular Function: auxin efflux transmembrane transporter activity (GO:0010329);; Biological Process: basipetal auxin transport (GO:0010540);; Biological Process: acropetal auxin transport (GO:00…	K05658|0|sita:101765168|putative multidrug resistance protein-like; K05658 ATP-binding cassette, subfamily B (MDR/TAP), member 1 [EC:3.6.3.44] (A)	ABC transporters (ko02010)	[Q]	Secondary metabolites biosynthesis, transport and catabolism	ABC transporter transmembrane region;; ABC transporter;; AAA domain;; RecF/RecN/SMC N terminal domain;; P-loop containing region of AAA domain;; AAA ATPase domain;; Predicted ATPase of the ABC class;; AAA domain;; Protein of unknown function, DUF258;; Zeta toxin;; Protein of unknown function (DUF1602);; Protein of unknown function (DUF1602)	Putative multidrug resistance protein GN=OSJNBb0031B09.19 OS=Oryza sativa subsp. japonica (Rice) PE=3 SV=1	Q	Secondary metabolites biosynthesis, transport and catabolism	PREDICTED: putative multidrug resistance protein-like [Setaria italica]
Seita.1G055600	Seita.1G055600	5.97133	829	1.04942	192	0.934043	147	0.376901	53	0.384465	65	0.310566	45	0.363567	2.76712	normal	--	--	--	--	--	--	--	--	--	--	--	--
Seita.1G055700	Seita.1G055700	0	0	0	0	0	0	0	0	0	0	0	0	--	--	--	[V]	Defense mechanisms	Molecular Function: ATP binding (GO:0005524);; Cellular Component: plasma membrane (GO:0005886);; Biological Process: ATP catabolic process (GO:0006200);; Biological Process: auxin efflux (GO:0010315);; Molecular Function: auxin efflux transmembrane transporter activity (GO:0010329);; Biological Process: basipetal auxin transport (GO:0010540);; Biological Process: acropetal auxin transport (GO:00…	K05658|0|sita:101776399|putative multidrug resistance protein-like; K05658 ATP-binding cassette, subfamily B (MDR/TAP), member 1 [EC:3.6.3.44] (A)	ABC transporters (ko02010)	[Q]	Secondary metabolites biosynthesis, transport and catabolism	ABC transporter transmembrane region;; ABC transporter;; RecF/RecN/SMC N terminal domain;; AAA domain;; P-loop containing region of AAA domain;; AAA ATPase domain;; AAA domain;; Predicted ATPase of the ABC class;; Zeta toxin;; Protein of unknown function, DUF258;; Protein of unknown function (DUF815);; Protein of unknown function (DUF1602);; Protein of unknown function (DUF1602)	Putative multidrug resistance protein GN=OSJNBb0031B09.19 OS=Oryza sativa subsp. japonica (Rice) PE=3 SV=1	Q	Secondary metabolites biosynthesis, transport and catabolism	PREDICTED: putative multidrug resistance protein-like [Setaria italica]
Seita.1G055800	Seita.1G055800	0	0	0.021339	1	0	0	0	0	0.023913	1	0.099091	2	--	--	--	--	--	--	--	--	--	--	--	--	--	--	--
Seita.1G055900	Seita.1G055900	48.9351	2170	36.2128	2111	43.3889	2160	27.3994	1216	26.4276	1410	36.681	1694	0.767764	0.574137	normal	--	--	Molecular Function: DNA binding (GO:0003677);; Molecular Function: sequence-specific DNA binding transcription factor activity (GO:0003700);; Cellular Component: nucleus (GO:0005634);; Biological Process: regulation of transcription, DNA-templated (GO:0006355);;	K09286|6.00327e-96|sita:101765573|ethylene-responsive transcription factor 3-like; K09286 EREBP-like factor (A)	--	--	--	AP2 domain	Ethylene-responsive transcription factor 3 GN=ERF3 OS=Nicotiana tabacum (Common tobacco) PE=2 SV=1	K	Transcription	PREDICTED: ethylene-responsive transcription factor 3-like [Setaria italica]
Seita.1G056000	Seita.1G056000	0.124656	9	0.051723	5	0.095215	8	0.083058	6	0.022989	2	0.173256	13	--	--	--	--	--	--	--	--	--	--	Cleavage site for pathogenic type III effector avirulence factor Avr	--	S	Function unknown	hypothetical protein ZEAMMB73_037276 [Zea mays]
Seita.1G056100	Seita.1G056100	0	0	0	0	0	0	0	0	0	0	0	0	--	--	--	--	--	--	--	--	--	--	No apical meristem-associated C-terminal domain	--	S	Function unknown	PREDICTED: glutathione S-transferase T3-like [Setaria italica]
Seita.1G056200	Seita.1G056200	0.098894	6	0.308472	25	0.384841	26	0.082199	5	0.062751	5	0.047486	3	--	--	--	[IR]	Lipid transport and metabolism;; General function prediction only	Biological Process: lipid metabolic process (GO:0006629);; Cellular Component: cytoplasmic membrane-bounded vesicle (GO:0016023);; Molecular Function: hydrolase activity, acting on ester bonds (GO:0016788);;	--	--	--	--	GDSL-like Lipase/Acylhydrolase	GDSL esterase/lipase At2g42990 (Precursor) GN=At2g42990 OS=Arabidopsis thaliana (Mouse-ear cress) PE=2 SV=1	R	General function prediction only	PREDICTED: GDSL esterase/lipase At2g42990-like [Setaria italica]
Seita.1G056300	Seita.1G056300	0	0	0	0	0	0	0	0	0.024217	2	0	0	--	--	--	--	--	Biological Process: lipid metabolic process (GO:0006629);; Cellular Component: cytoplasmic membrane-bounded vesicle (GO:0016023);; Molecular Function: hydrolase activity, acting on ester bonds (GO:0016788);;	--	--	--	--	GDSL-like Lipase/Acylhydrolase	GDSL esterase/lipase At2g04570 (Precursor) GN=At2g04570 OS=Arabidopsis thaliana (Mouse-ear cress) PE=2 SV=1	R	General function prediction only	PREDICTED: GDSL esterase/lipase At2g04570-like [Setaria italica]
Seita.1G056400	Seita.1G056400	0	0	0	0	0	0	0	0	0	0	0	0	--	--	--	--	--	--	--	--	--	--	F-box domain	--	R	General function prediction only	hypothetical protein [Oryza sativa Japonica Group]
Seita.1G056500	Seita.1G056500	3.68573	222	2.94647	234	2.44968	166	3.57591	216	4.12789	298	3.31619	208	0.995214	-0.21624	normal	--	--	Molecular Function: RNA polymerase II transcription cofactor activity (GO:0001104);; Biological Process: regulation of transcription from RNA polymerase II promoter (GO:0006357);; Cellular Component: mediator complex (GO:0016592);;	K15131|3.81522e-74|sita:101767225|mediator of RNA polymerase II transcription subunit 11-like; K15131 mediator of RNA polymerase II transcription subunit 11 (A)	--	--	--	Mediator complex protein	Mediator of RNA polymerase II transcription subunit 11 GN=T13O15 OS=Arabidopsis thaliana (Mouse-ear cress) PE=1 SV=1	S	Function unknown	PREDICTED: mediator of RNA polymerase II transcription subunit 11-like [Setaria italica]
Seita.1G056600	Seita.1G056600	0.527985	6	1.24973	18	1.09321	13	0.98615	11	0.666072	9	0.723535	8	--	--	--	--	--	--	--	--	--	--	--	--	--	--	--
Seita.1G056700	Seita.1G056700	160.367	5416	167.953	7475	160.867	6119	97.8196	3316	94.906	3848	69.2827	2438	0.340665	1.00137	normal	--	--	Molecular Function: structural constituent of ribosome (GO:0003735);; Cellular Component: ribosome (GO:0005840);; Biological Process: translation (GO:0006412);;	--	--	--	--	Ribosomal protein S21	30S ribosomal protein S21, chloroplastic (Fragment) GN=rps21 OS=Spinacia oleracea (Spinach) PE=1 SV=1	S	Function unknown	unknown [Zea mays]
Seita.1G056800	Seita.1G056800	0	0	0.074816	2	0.218255	3	0	0	0.082127	2	0	0	--	--	--	--	--	--	--	--	--	--	--	--	--	--	PREDICTED: uncharacterized protein LOC101777208 [Setaria italica]
Seita.1G056900	Seita.1G056900	4.15347	625	2.92075	579	3.47567	589	4.53155	684	5.3503	966	4.84321	759	0.906058	-0.416757	normal	--	--	--	--	--	--	--	--	U11/U12 small nuclear ribonucleoprotein 25 kDa protein GN=SNRNP25 OS=Arabidopsis thaliana (Mouse-ear cress) PE=2 SV=1	S	Function unknown	PREDICTED: uncharacterized protein LOC101768023 [Setaria italica]
Seita.1G057000	Seita.1G057000	0	0	0	0	0.151766	5	0	0	0	0	0.08204	3	--	--	--	--	--	--	--	--	--	--	--	--	--	--	PREDICTED: uncharacterized protein LOC101768421 [Setaria italica]
Seita.1G057100	Seita.1G057100	3.05228	317	152.962	20928	205.752	24060	340.041	35427	339.146	42270	408.825	44219	0.273364	-1.35246	normal	--	--	Biological Process: metabolic process (GO:0008152);; Biological Process: response to UV-B (GO:0010224);; Molecular Function: UDP-glucosyltransferase activity (GO:0035251);;	--	--	[GC]	Carbohydrate transport and metabolism;; Energy production and conversion	UDP-glucoronosyl and UDP-glucosyl transferase	Cinnamate beta-D-glucosyltransferase {ECO:0000303|PubMed:16443693, ECO:0000303|PubMed:17323078} OS=Fragaria ananassa (Strawberry) PE=1 SV=1	1761		PREDICTED: cinnamate beta-D-glucosyltransferase-like [Setaria italica]
Seita.1G057200	Seita.1G057200	1.43076	30	1.93173	53	2.35941	55	2.57608	54	3.2844	81	2.20371	48	0.96803	-0.361422	normal	--	--	Cellular Component: intracellular part (GO:0044424);; Biological Process: regulation of cell cycle (GO:0051726);;	K06627|9.32633e-52|sita:101766474|cyclin-A3-2-like; K06627 cyclin A (A)	--	[D]	Cell cycle control, cell division, chromosome partitioning	Cyclin, N-terminal domain	Cyclin-A3-2 GN=OsJ_035222 OS=Oryza sativa subsp. japonica (Rice) PE=2 SV=1	D	Cell cycle control, cell division, chromosome partitioning	PREDICTED: cyclin-A3-2-like isoform X1 [Setaria italica]
Seita.1G057300	Seita.1G057300	8.64795	512	22.3224	1739	41.8442	2786	48.4757	2876	49.1418	3488	72.2325	4449	0.235686	-1.03769	normal	[R]	General function prediction only	Molecular Function: alcohol dehydrogenase activity, zinc-dependent (GO:0004024);; Molecular Function: zinc ion binding (GO:0008270);; Molecular Function: electron carrier activity (GO:0009055);; Biological Process: lignin biosynthetic process (GO:0009809);; Molecular Function: heme binding (GO:0020037);; Biological Process: electron transport chain (GO:0022900);; Molecular Function: cinnamyl-alco…	K00083|0|sita:101769241|probable cinnamyl alcohol dehydrogenase-like; K00083 cinnamyl-alcohol dehydrogenase [EC:1.1.1.195] (A)	Phenylpropanoid biosynthesis (ko00940)	[Q]	Secondary metabolites biosynthesis, transport and catabolism	Alcohol dehydrogenase GroES-like domain;; Zinc-binding dehydrogenase	Probable cinnamyl alcohol dehydrogenase GN=CAD OS=Saccharum officinarum (Sugarcane) PE=2 SV=1	Q	Secondary metabolites biosynthesis, transport and catabolism	PREDICTED: probable cinnamyl alcohol dehydrogenase-like [Setaria italica]
Seita.1G057400	Seita.1G057400	14.4151	638	44.3788	2586	36.2152	1804	17.9991	799	20.4599	1087	19.6996	908	0.75263	0.886005	normal	[KAD]	Transcription;; RNA processing and modification;; Cell cycle control, cell division, chromosome partitioning	Molecular Function: DNA binding (GO:0003677);; Molecular Function: chromatin binding (GO:0003682);; Biological Process: response to water deprivation (GO:0009414);; Biological Process: response to salt stress (GO:0009651);; Biological Process: response to ethylene (GO:0009723);; Biological Process: response to auxin (GO:0009733);; Biological Process: response to abscisic acid (GO:0009737);; Biolo…	K09422|1.92571e-102|sita:101769643|transcription factor MYB44-like; K09422 myb proto-oncogene protein, plant (A)	--	[K]	Transcription	Myb-like DNA-binding domain;; Myb-like DNA-binding domain	Transcription factor MYB44 GN=K8K14.2 OS=Arabidopsis thaliana (Mouse-ear cress) PE=2 SV=1	K	Transcription	PREDICTED: transcription factor MYB44-like [Setaria italica]
Seita.1G057500	Seita.1G057500	118.926	5321	179.351	11071	168.629	8847	150.331	7048	141.367	7965	117.546	5794	0.981967	0.305133	normal	--	--	Molecular Function: iron ion transmembrane transporter activity (GO:0005381);; Biological Process: cellular metal ion homeostasis (GO:0006875);; Cellular Component: chloroplast inner membrane (GO:0009706);; Molecular Function: copper uptake transmembrane transporter activity (GO:0015088);; Biological Process: iron ion transmembrane transport (GO:0034755);; Molecular Function: protein homodimeriza…	--	--	--	--	Protein of unknown function (DUF3611)	Protein TIC 21, chloroplastic (Precursor) GN=F27O10.6 OS=Arabidopsis thaliana (Mouse-ear cress) PE=1 SV=1	S	Function unknown	PREDICTED: protein TIC 21, chloroplastic-like isoform X2 [Setaria italica]
Seita.1G057600	Seita.1G057600	22.6388	752	23.1757	1014	23.4638	878	23.8928	797	23.5612	940	20.1867	699	0.999228	0.133226	normal	[S]	Function unknown	Cellular Component: chloroplast (GO:0009507);;	--	--	[S]	Function unknown	Uncharacterised protein family UPF0047	--	S	Function unknown	PREDICTED: UPF0047 protein C4A8.02c-like [Setaria italica]
Seita.1G057700	Seita.1G057700	0.116908	10	0.194882	22	0.131831	13	0.844503	72	0.866862	88	1.75048	155	0.00331187	-2.81436	down	[C]	Energy production and conversion	Molecular Function: phosphoric diester hydrolase activity (GO:0008081);; Cellular Component: membrane (GO:0016020);; Biological Process: primary metabolic process (GO:0044238);; Biological Process: single-organism metabolic process (GO:0044710);; Biological Process: organic substance metabolic process (GO:0071704);;	--	--	[C]	Energy production and conversion	Glycerophosphoryl diester phosphodiesterase family	Glycerophosphodiester phosphodiesterase GDPDL7 {ECO:0000305} (Precursor) OS=Arabidopsis thaliana (Mouse-ear cress) PE=2 SV=1	S	Function unknown	PREDICTED: probable glycerophosphoryl diester phosphodiesterase 2-like [Setaria italica]
Seita.1G057800	Seita.1G057800	0	0	0	0	0	0	0.02394	2	0.853117	20	0	0	--	--	--	--	--	--	--	--	--	--	--	--	--	--	--
Seita.1G057900	Seita.1G057900	4.03455	208	2.70975	184	3.12207	182	2.38425	123	2.03989	127	1.63322	89	0.819805	0.761081	normal	--	--	Molecular Function: sugar:proton symporter activity (GO:0005351);; Cellular Component: chloroplast envelope (GO:0009941);; Cellular Component: integral component of membrane (GO:0016021);; Biological Process: photosynthesis, light reaction (GO:0019684);; Molecular Function: 2-alkenal reductase [NAD(P)] activity (GO:0032440);; Biological Process: carbohydrate transmembrane transport (GO:0034219);;…	--	--	[R]	General function prediction only	Sugar (and other) transporter;; Protein of unknown function (DUF791)	D-xylose-proton symporter-like 3, chloroplastic (Precursor) GN=At5g59250 OS=Arabidopsis thaliana (Mouse-ear cress) PE=2 SV=2	R	General function prediction only	PREDICTED: D-xylose-proton symporter-like 3, chloroplastic-like isoform X2 [Setaria italica]
Seita.1G058000	Seita.1G058000	9.14006	484	5.94607	415	6.09467	364	7.28712	387	7.29436	464	4.96025	274	0.999228	0.167207	normal	[S]	Function unknown	Biological Process: glycerol metabolic process (GO:0006071);; Biological Process: lipid metabolic process (GO:0006629);; Molecular Function: glycerophosphodiester phosphodiesterase activity (GO:0008889);; Cellular Component: membrane (GO:0016020);;	--	--	--	--	SNARE associated Golgi protein	--	S	Function unknown	PREDICTED: uncharacterized protein LOC101772180 [Setaria italica]
Seita.1G058100	Seita.1G058100	2.72547	232	0.482147	54	0.722697	70	0.723772	62	1.00651	103	1.00368	89	0.965205	0.4349	normal	--	--	Cellular Component: endosome (GO:0005768);; Cellular Component: trans-Golgi network (GO:0005802);; Biological Process: metabolic process (GO:0008152);; Cellular Component: membrane (GO:0016020);; Molecular Function: transferase activity (GO:0016740);;	--	--	[GMW]	Carbohydrate transport and metabolism;; Cell wall/membrane/envelope biogenesis;; Extracellular structures	Exostosin family	Probable glycosyltransferase At5g03795 GN=At5g03795 OS=Arabidopsis thaliana (Mouse-ear cress) PE=3 SV=2	1928		PREDICTED: probable glycosyltransferase At5g03795-like [Setaria italica]
Seita.1G058200	Seita.1G058200	3.05966	480	5.50781	1130	4.60886	823	7.43636	1165	22.5573	3473	6.32247	1027	0.604643	-1.15075	normal	[R]	General function prediction only	Cellular Component: cell wall (GO:0005618);; Biological Process: response to salt stress (GO:0009651);; Cellular Component: cytoplasmic membrane-bounded vesicle (GO:0016023);; Molecular Function: hydrolase activity (GO:0016787);;	--	--	--	--	Putative cyclase	--	R	General function prediction only	PREDICTED: uncharacterized protein LOC101772991 [Setaria italica]
Seita.1G058300	Seita.1G058300	53.9541	3285	24.6128	1985	26.7675	1836	57.3757	3511	5.13826	418	54.8539	3478	1	-0.139474	normal	[R]	General function prediction only	Cellular Component: cell wall (GO:0005618);; Biological Process: response to salt stress (GO:0009651);; Cellular Component: cytoplasmic membrane-bounded vesicle (GO:0016023);; Molecular Function: hydrolase activity (GO:0016787);;	--	--	--	--	Putative cyclase	--	R	General function prediction only	PREDICTED: uncharacterized protein LOC101773399 isoform X1 [Setaria italica]
Seita.1G058400	Seita.1G058400	0.648063	45	0.174236	16	0.317461	25	0.873545	61	0.702169	59	1.06472	77	0.389717	-1.23319	normal	[Q]	Secondary metabolites biosynthesis, transport and catabolism	Molecular Function: monooxygenase activity (GO:0004497);; Molecular Function: iron ion binding (GO:0005506);; Molecular Function: electron carrier activity (GO:0009055);; Molecular Function: oxidoreductase activity, acting on paired donors, with incorporation or reduction of molecular oxygen (GO:0016705);; Molecular Function: heme binding (GO:0020037);; Biological Process: oxidation-reduction pro…	--	--	[Q]	Secondary metabolites biosynthesis, transport and catabolism	Cytochrome P450	Premnaspirodiene oxygenase GN=CYP71D55 OS=Hyoscyamus muticus (Egyptian henbane) PE=1 SV=1	Q	Secondary metabolites biosynthesis, transport and catabolism	PREDICTED: premnaspirodiene oxygenase-like [Setaria italica]
Seita.1G058500	Seita.1G058500	6.55869	467	4.00343	376	3.97474	319	8.41227	601	6.11724	523	9.8408	730	0.733857	-0.703329	normal	[Q]	Secondary metabolites biosynthesis, transport and catabolism	Molecular Function: monooxygenase activity (GO:0004497);; Molecular Function: iron ion binding (GO:0005506);; Molecular Function: electron carrier activity (GO:0009055);; Molecular Function: oxidoreductase activity, acting on paired donors, with incorporation or reduction of molecular oxygen (GO:0016705);; Molecular Function: heme binding (GO:0020037);; Biological Process: oxidation-reduction pro…	--	--	[Q]	Secondary metabolites biosynthesis, transport and catabolism	Cytochrome P450	Premnaspirodiene oxygenase GN=CYP71D55 OS=Hyoscyamus muticus (Egyptian henbane) PE=1 SV=1	Q	Secondary metabolites biosynthesis, transport and catabolism	PREDICTED: premnaspirodiene oxygenase-like [Setaria italica]
Seita.1G058600	Seita.1G058600	12.2758	452	3.41661	166	3.66596	152	3.75148	139	3.90027	173	3.34979	129	0.762057	0.758149	normal	--	--	Cellular Component: plastid (GO:0009536);; Biological Process: embryo sac egg cell differentiation (GO:0009560);;	--	--	--	--	--	--	S	Function unknown	PREDICTED: golgin IMH1-like [Setaria italica]
Seita.1G058700	Seita.1G058700	8.49461	540	0.950359	80	1.35343	97	4.84298	309	3.17213	243	3.55559	236	1	-0.229995	normal	[RTKL]	General function prediction only;; Signal transduction mechanisms;; Transcription;; Replication, recombination and repair	Molecular Function: protein serine/threonine kinase activity (GO:0004674);; Molecular Function: ATP binding (GO:0005524);; Biological Process: protein phosphorylation (GO:0006468);;	--	--	[T]	Signal transduction mechanisms	Protein tyrosine kinase;; Protein kinase domain	PTI1-like tyrosine-protein kinase At3g15890 GN=At3g15890 OS=Arabidopsis thaliana (Mouse-ear cress) PE=2 SV=1	T	Signal transduction mechanisms	PREDICTED: PTI1-like tyrosine-protein kinase At3g15890-like [Setaria italica]
Seita.1G058800	Seita.1G058800	6.5508	432	4.88912	523	5.10086	450	4.28029	323	4.45885	396	12.9349	1041	0.990899	-0.346454	normal	--	--	Cellular Component: mitochondrion (GO:0005739);;	--	--	--	--	FBD;; F-box domain	--	R	General function prediction only	PREDICTED: FBD-associated F-box protein At4g13985-like isoform X1 [Setaria italica]
Seita.1G058900	Seita.1G058900	4.21223	490	3.91285	599	4.58108	600	4.52566	528	3.55579	496	4.07054	493	0.999228	0.162829	normal	--	--	Biological Process: response to reactive oxygen species (GO:0000302);; Cellular Component: plastid (GO:0009536);; Biological Process: response to iron ion (GO:0010039);; Biological Process: iron ion homeostasis (GO:0055072);;	--	--	--	--	--	--	S	Function unknown	PREDICTED: myosin-4-like [Setaria italica]
Seita.1G059000	Seita.1G059000	0	0	0	0	0	0	0	0	0	0	0	0	--	--	--	--	--	--	--	--	--	--	--	--	S	Function unknown	PREDICTED: uncharacterized protein LOC101778942 [Setaria italica]
Seita.1G059100	Seita.1G059100	0	0	0	0	0	0	0	0	0	0	0	0	--	--	--	[Q]	Secondary metabolites biosynthesis, transport and catabolism	Molecular Function: monooxygenase activity (GO:0004497);; Molecular Function: iron ion binding (GO:0005506);; Molecular Function: electron carrier activity (GO:0009055);; Cellular Component: cytoplasmic membrane-bounded vesicle (GO:0016023);; Molecular Function: oxidoreductase activity, acting on paired donors, with incorporation or reduction of molecular oxygen (GO:0016705);; Molecular Function:…	--	--	[Q]	Secondary metabolites biosynthesis, transport and catabolism	Cytochrome P450	Premnaspirodiene oxygenase GN=CYP71D55 OS=Hyoscyamus muticus (Egyptian henbane) PE=1 SV=1	Q	Secondary metabolites biosynthesis, transport and catabolism	PREDICTED: premnaspirodiene oxygenase-like [Setaria italica]
Seita.1G059200	Seita.1G059200	0.029512	2	0.022394	2	0	0	0	0	0	0	0	0	--	--	--	[Q]	Secondary metabolites biosynthesis, transport and catabolism	Molecular Function: monooxygenase activity (GO:0004497);; Molecular Function: iron ion binding (GO:0005506);; Molecular Function: electron carrier activity (GO:0009055);; Cellular Component: cytoplasmic membrane-bounded vesicle (GO:0016023);; Molecular Function: oxidoreductase activity, acting on paired donors, with incorporation or reduction of molecular oxygen (GO:0016705);; Molecular Function:…	--	--	[Q]	Secondary metabolites biosynthesis, transport and catabolism	Cytochrome P450	Premnaspirodiene oxygenase GN=CYP71D55 OS=Hyoscyamus muticus (Egyptian henbane) PE=1 SV=1	Q	Secondary metabolites biosynthesis, transport and catabolism	PREDICTED: premnaspirodiene oxygenase-like [Setaria italica]
Seita.1G059300	Seita.1G059300	0	0	0	0	0	0	0	0	0	0	0	0	--	--	--	[Q]	Secondary metabolites biosynthesis, transport and catabolism	Molecular Function: monooxygenase activity (GO:0004497);; Molecular Function: iron ion binding (GO:0005506);; Molecular Function: electron carrier activity (GO:0009055);; Molecular Function: oxidoreductase activity, acting on paired donors, with incorporation or reduction of molecular oxygen (GO:0016705);; Molecular Function: heme binding (GO:0020037);; Biological Process: oxidation-reduction pro…	--	--	[Q]	Secondary metabolites biosynthesis, transport and catabolism	Cytochrome P450	Premnaspirodiene oxygenase GN=CYP71D55 OS=Hyoscyamus muticus (Egyptian henbane) PE=1 SV=1	Q	Secondary metabolites biosynthesis, transport and catabolism	PREDICTED: ent-cassadiene C2-hydroxylase-like [Setaria italica]
Seita.1G059400	Seita.1G059400	8.87329	706	7.27191	765	6.95995	632	10.3423	820	10.2615	971	8.25255	688	0.983366	-0.233162	normal	--	--	Cellular Component: ubiquitin ligase complex (GO:0000151);; Molecular Function: ubiquitin-protein transferase activity (GO:0004842);; Molecular Function: zinc ion binding (GO:0008270);; Cellular Component: plastid (GO:0009536);; Biological Process: abscisic acid biosynthetic process (GO:0009688);; Biological Process: regulation of seed germination (GO:0010029);; Biological Process: protein ubiqui…	K10632|0|sita:101777195|BRCA1-associated protein-like; K10632 BRCA1-associated protein [EC:6.3.2.19] (A)	--	[R]	General function prediction only	BRCA1-associated protein 2;; Zn-finger in ubiquitin-hydrolases and other protein;; Ring finger domain;; Zinc finger, C3HC4 type (RING finger)	RING-H2 finger protein ATL54 GN=ATL54 OS=Arabidopsis thaliana (Mouse-ear cress) PE=2 SV=2	O	Posttranslational modification, protein turnover, chaperones	PREDICTED: BRCA1-associated protein-like isoform X1 [Setaria italica]
Seita.1G059500	Seita.1G059500	0	0	0	0	0	0	0	0	0	0	0	0	--	--	--	--	--	--	--	--	--	--	PLATZ transcription factor	--	S	Function unknown	PREDICTED: uncharacterized protein LOC101778152 [Setaria italica]
Seita.1G059600	Seita.1G059600	0.040975	3	0.021305	2	0.02501	3	0	0	0.022368	2	0.017524	2	--	--	--	--	--	Cellular Component: plasma membrane (GO:0005886);;	--	--	--	--	--	--	R	General function prediction only	PREDICTED: uncharacterized protein LOC101778553 [Setaria italica]
Seita.1G059700	Seita.1G059700	0	0	0	0	0	0	0	0	0	0	0	0	--	--	--	--	--	--	--	--	--	--	--	--	S	Function unknown	PREDICTED: uncharacterized protein LOC101780850, partial [Setaria italica]
Seita.1G059800	Seita.1G059800	4.3876	500	4.11618	568	3.78281	454	2.91618	334	3.08094	412	4.82493	517	0.985021	0.260663	normal	[R]	General function prediction only	Molecular Function: acyl binding (GO:0000035);; Molecular Function: zinc ion binding (GO:0008270);; Biological Process: cell tip growth (GO:0009932);; Cellular Component: membrane (GO:0016020);; Molecular Function: S-acyltransferase activity (GO:0016417);;	--	--	[R]	General function prediction only	DHHC palmitoyltransferase;; Ankyrin repeats (3 copies);; Ankyrin repeat;; Ankyrin repeats (many copies);; Ankyrin repeats (many copies);; Ankyrin repeat	Protein S-acyltransferase 24 GN=F5O24.240 OS=Arabidopsis thaliana (Mouse-ear cress) PE=2 SV=1	R	General function prediction only	PREDICTED: S-acyltransferase TIP1-like isoform X1 [Setaria italica]
Seita.1G059900	Seita.1G059900	37.5125	1357	25.0371	1194	31.7475	1294	30.7489	1116	32.6986	1420	28.7747	1085	1	0.095506	normal	--	--	--	--	--	--	--	--	--	S	Function unknown	PREDICTED: retrotransposon-like protein 1-like isoform X1 [Setaria italica]
Seita.1G060000	Seita.1G060000	64.171	6970	35.6831	5108	30.685	3754	19.3558	2110	21.7301	2834	22.5502	2552	0.227032	1.05511	normal	--	--	Molecular Function: inorganic diphosphatase activity (GO:0004427);; Molecular Function: hydrogen-translocating pyrophosphatase activity (GO:0009678);; Biological Process: proton transport (GO:0015992);; Cellular Component: membrane (GO:0016020);; Cellular Component: cytoplasmic membrane-bounded vesicle (GO:0016023);;	K01507|0|sbi:SORBI_04g005710|SORBIDRAFT_04g005710, Sb04g005710; hypothetical protein; K01507 inorganic pyrophosphatase [EC:3.6.1.1] (A)	Oxidative phosphorylation (ko00190)	--	--	Inorganic H+ pyrophosphatase	Pyrophosphate-energized vacuolar membrane proton pump OS=Vigna radiata var. radiata (Mung bean) PE=1 SV=4	S	Function unknown	PREDICTED: pyrophosphate-energized vacuolar membrane proton pump-like isoform X3 [Setaria italica]
Seita.1G060100	Seita.1G060100	2.70982	79	0.871214	34	0.84212	28	0.550088	16	0.286815	10	0.264937	8	--	--	--	--	--	--	--	--	--	--	--	--	--	--	--
Seita.1G060200	Seita.1G060200	10.7762	1360	15.6309	2586	14.16	2007	11.2338	1415	10.038	1511	10.5596	1387	0.871581	0.480675	normal	[M]	Cell wall/membrane/envelope biogenesis	Molecular Function: amidophosphoribosyltransferase activity (GO:0004044);; Cellular Component: plasma membrane (GO:0005886);; Biological Process: sucrose biosynthetic process (GO:0005986);; Molecular Function: sucrose-phosphate synthase activity (GO:0046524);;	K00696|0|sita:101781780|probable sucrose-phosphate synthase 2-like; K00696 sucrose-phosphate synthase [EC:2.4.1.14] (A)	Starch and sucrose metabolism (ko00500)	[M]	Cell wall/membrane/envelope biogenesis	Glycosyl transferases group 1;; Sucrose-6F-phosphate phosphohydrolase;; Sucrose synthase;; Glycosyl transferase 4-like domain;; Glycosyl transferases group 1	Probable sucrose-phosphate synthase 2 OS=Oryza sativa subsp. japonica (Rice) PE=2 SV=2	M	Cell wall/membrane/envelope biogenesis	PREDICTED: probable sucrose-phosphate synthase 2-like [Setaria italica]
Seita.1G060300	Seita.1G060300	36.0056	2513	63.0882	5802	62.9304	4947	47.1541	3303	50.9223	4267	57.0441	4148	0.995214	0.207706	normal	--	--	Cellular Component: plastid (GO:0009536);;	--	--	--	--	CUE domain	--	S	Function unknown	PREDICTED: uncharacterized protein LOC101782176 [Setaria italica]
Seita.1G060400	Seita.1G060400	1.71292	142	1.80528	197	1.95322	182	4.37758	363	4.20938	418	4.15766	337	0.407167	-1.08418	normal	--	--	--	--	--	--	--	--	--	--	--	PREDICTED: uncharacterized protein LOC101782994 [Setaria italica]
Seita.1G060500	Seita.1G060500	26.1242	826	15.0486	627	16.1321	575	30.8686	980	33.4125	1268	40.4976	1334	0.451202	-0.835932	normal	--	--	--	--	--	--	--	--	--	S	Function unknown	PREDICTED: uncharacterized protein LOC101784067 [Setaria italica]
Seita.1G060600	Seita.1G060600	63.8398	4111	83.1742	7058	79.16	5741	76.5505	4947	70.787	5472	80.2952	5387	1	0.110981	normal	--	--	Molecular Function: sequence-specific DNA binding transcription factor activity (GO:0003700);; Cellular Component: nucleus (GO:0005634);; Biological Process: regulation of transcription, DNA-templated (GO:0006355);; Biological Process: detection of ethylene stimulus (GO:0009727);; Cellular Component: cytoplasmic membrane-bounded vesicle (GO:0016023);; Molecular Function: sequence-specific DNA bin…	--	--	[K]	Transcription	KNOX2 domain;; KNOX1 domain;; Homeobox KN domain;; ELK domain;; Homeobox domain	Homeobox protein knotted-1-like 2 GN=HOS58 OS=Oryza sativa subsp. japonica (Rice) PE=2 SV=2	K	Transcription	PREDICTED: homeobox protein knotted-1-like 2-like isoform X2 [Setaria italica]
Seita.1G060700	Seita.1G060700	13.209	651	15.8277	1027	17.6367	978	11.3779	563	10.8254	640	10.0136	514	0.739502	0.653308	normal	--	--	--	--	--	--	--	--	--	S	Function unknown	PREDICTED: uncharacterized protein LOC101784481 [Setaria italica]
Seita.1G060800	Seita.1G060800	3.14895	276	4.72841	548	4.844	484	3.13243	273	2.16756	228	1.99286	188	0.554957	0.945799	normal	[RTKL]	General function prediction only;; Signal transduction mechanisms;; Transcription;; Replication, recombination and repair	Molecular Function: protein serine/threonine kinase activity (GO:0004674);; Molecular Function: ATP binding (GO:0005524);; Biological Process: protein phosphorylation (GO:0006468);;	--	--	[T]	Signal transduction mechanisms	Protein kinase domain;; Protein tyrosine kinase	Probable receptor-like protein kinase At1g80640 (Precursor) GN=At1g80640 OS=Arabidopsis thaliana (Mouse-ear cress) PE=2 SV=1	T	Signal transduction mechanisms	PREDICTED: probable receptor-like protein kinase At1g80640-like [Setaria italica]
Seita.1G060900	Seita.1G060900	14.5835	607	13.0528	715	12.7659	598	14.9532	624	13.5953	679	16.5159	716	1	-0.0746703	normal	[O]	Posttranslational modification, protein turnover, chaperones	Molecular Function: threonine-type endopeptidase activity (GO:0004298);; Cellular Component: nucleus (GO:0005634);; Cellular Component: proteasome core complex (GO:0005839);; Cellular Component: plasma membrane (GO:0005886);; Biological Process: ubiquitin-dependent protein catabolic process (GO:0006511);; Cellular Component: cytoplasmic membrane-bounded vesicle (GO:0016023);;	K02735|4.37631e-151|sita:101785272|proteasome subunit beta type-3-like; K02735 20S proteasome subunit beta 3 [EC:3.4.25.1] (A)	Proteasome (ko03050)	[O]	Posttranslational modification, protein turnover, chaperones	Proteasome subunit	Proteasome subunit beta type-3 GN=P0416A11.24 OS=Oryza sativa subsp. japonica (Rice) PE=2 SV=1	O	Posttranslational modification, protein turnover, chaperones	PREDICTED: proteasome subunit beta type-3-like [Setaria italica]
Seita.1G061000	Seita.1G061000	0	0	0.037596	2	0	0	0	0	0.005967	1	0	0	--	--	--	--	--	--	--	--	--	--	--	Zinc finger protein 7 GN=ZFP7 OS=Arabidopsis thaliana (Mouse-ear cress) PE=2 SV=1	R	General function prediction only	PREDICTED: zinc finger protein 6-like [Setaria italica]
Seita.1G061100	Seita.1G061100	3.97505	67	4.86213	107	3.73117	70	2.79819	47	3.47489	70	3.20553	56	0.950385	0.506615	normal	--	--	--	--	--	--	--	--	--	--	--	--
Seita.1G061200	Seita.1G061200	11.0063	1068	54.006	7263	49.1118	5594	35.1073	3585	36.0026	4390	31.3054	3303	0.992981	0.356592	normal	[TK]	Signal transduction mechanisms;; Transcription	Molecular Function: phosphorelay response regulator activity (GO:0000156);; Biological Process: phosphorelay signal transduction system (GO:0000160);; Molecular Function: DNA binding (GO:0003677);; Molecular Function: chromatin binding (GO:0003682);; Biological Process: regulation of transcription, DNA-templated (GO:0006355);; Biological Process: intracellular signal transduction (GO:0035556);;	K14491|0|sita:101785953|two-component response regulator ARR10-like; K14491 two-component response regulator ARR-B family (A)	Plant hormone signal transduction (ko04075)	[K]	Transcription	Response regulator receiver domain;; Myb-like DNA-binding domain	Two-component response regulator ARR12 GN=ARR12 OS=Arabidopsis thaliana (Mouse-ear cress) PE=2 SV=2	K	Transcription	PREDICTED: two-component response regulator ARR10-like isoform X1 [Setaria italica]
Seita.1G061300	Seita.1G061300	2.0463	269	1.55309	269	1.04209	153	1.78619	235	1.39755	218	1.60879	216	1	0.0170026	normal	[O]	Posttranslational modification, protein turnover, chaperones	Molecular Function: ATP binding (GO:0005524);; Cellular Component: mitochondrion (GO:0005739);; Biological Process: ATP catabolic process (GO:0006200);; Biological Process: protein folding (GO:0006457);; Biological Process: response to heat (GO:0009408);; Cellular Component: chloroplast stroma (GO:0009570);; Biological Process: response to high light intensity (GO:0009644);; Cellular Component: c…	K03695|0|sita:101786618|chaperone protein ClpB3, mitochondrial-like; K03695 ATP-dependent Clp protease ATP-binding subunit ClpB (A)	--	[O]	Posttranslational modification, protein turnover, chaperones	AAA domain (Cdc48 subfamily);; Clp amino terminal domain;; C-terminal, D2-small domain, of ClpB protein;; ATPase family associated with various cellular activities (AAA);; AAA domain (dynein-related subfamily);; AAA ATPase domain;; AAA domain;; Sigma-54 interaction domain;; AAA domain;; AAA domain;; AAA domain;; IstB-like ATP binding protein;; Magnesium chelatase, subunit ChlI	Chaperone protein ClpB3, mitochondrial (Precursor) OS=Oryza sativa subsp. japonica (Rice) PE=2 SV=3	O	Posttranslational modification, protein turnover, chaperones	PREDICTED: chaperone protein ClpB3, mitochondrial-like [Setaria italica]
Seita.1G061400	Seita.1G061400	0	0	0	0	0	0	0	0	0	0	0	0	--	--	--	--	--	--	--	--	--	--	--	--	--	--	--
Seita.1G061500	Seita.1G061500	9.76824	524	7.51217	529	7.24677	434	9.57219	500	7.95643	499	8.9053	492	1	-0.0140497	normal	--	--	Biological Process: rRNA processing (GO:0006364);; Biological Process: tRNA metabolic process (GO:0006399);; Biological Process: aromatic amino acid family biosynthetic process (GO:0009073);; Biological Process: chloroplast organization (GO:0009658);; Cellular Component: chloroplast inner membrane (GO:0009706);; Biological Process: embryo development ending in seed dormancy (GO:0009793);; Biologi…	--	--	--	--	Protein of unknown function (DUF3353)	--	S	Function unknown	PREDICTED: uncharacterized protein LOC101752469 isoform X2 [Setaria italica]
Seita.1G061600	Seita.1G061600	0	0	0	0	0	0	0	0	0	0	0	0	--	--	--	--	--	Cellular Component: mitochondrion (GO:0005739);; Cellular Component: plastid (GO:0009536);; Cellular Component: membrane (GO:0016020);; Cellular Component: cytoplasmic membrane-bounded vesicle (GO:0016023);;	--	--	--	--	--	--	R	General function prediction only	Os07g0115700 [Oryza sativa Japonica Group]
Seita.1G061700	Seita.1G061700	0	0	0	0	0	0	0	0	0	0	0	0	--	--	--	--	--	Cellular Component: mitochondrion (GO:0005739);;	--	--	[R]	General function prediction only	PPR repeat family;; PPR repeat;; Pentatricopeptide repeat domain;; PPR repeat	Pentatricopeptide repeat-containing protein At3g25210, mitochondrial (Precursor) GN=At3g25210 OS=Arabidopsis thaliana (Mouse-ear cress) PE=2 SV=1	S	Function unknown	PREDICTED: pentatricopeptide repeat-containing protein At3g25210, mitochondrial-like [Setaria italica]
Seita.1G061800	Seita.1G061800	5.88854	446	3.32363	345	4.08197	332	6.13721	422	6.37747	514	5.87918	377	0.993235	-0.229637	normal	[C]	Energy production and conversion	Biological Process: glycerol metabolic process (GO:0006071);; Biological Process: lipid metabolic process (GO:0006629);; Molecular Function: glycerophosphodiester phosphodiesterase activity (GO:0008889);; Cellular Component: membrane (GO:0016020);;	--	--	[C]	Energy production and conversion	Glycerophosphoryl diester phosphodiesterase family	Glycerophosphodiester phosphodiesterase GDPDL7 {ECO:0000305} (Precursor) OS=Arabidopsis thaliana (Mouse-ear cress) PE=2 SV=1	S	Function unknown	PREDICTED: probable glycerophosphoryl diester phosphodiesterase 2-like [Setaria italica]
Seita.1G061900	Seita.1G061900	14.8742	1156	9.79653	1470	9.97884	1204	16.6395	1683	14.4048	1870	14.138	1556	0.896779	-0.40981	normal	[O]	Posttranslational modification, protein turnover, chaperones	Biological Process: ubiquitin-dependent protein catabolic process (GO:0006511);;	K14016|0|sita:101754231|ubiquitin fusion degradation protein 1 homolog; K14016 ubiquitin fusion degradation protein 1 (A)	Protein processing in endoplasmic reticulum (ko04141)	[O]	Posttranslational modification, protein turnover, chaperones	Ubiquitin fusion degradation protein UFD1	--	O	Posttranslational modification, protein turnover, chaperones	PREDICTED: ubiquitin fusion degradation protein 1 homolog [Setaria italica]
Seita.1G062000	Seita.1G062000	0	0	0	0	0.099789	9	0	0	0	0	0.160608	13	--	--	--	--	--	--	--	--	--	--	--	--	S	Function unknown	PREDICTED: uncharacterized protein LOC101755034 [Setaria italica]
Seita.1G062100	Seita.1G062100	241.303	14456	33.4304	2640	47.2966	3192	77.1513	4639	110.234	7928	135.204	8439	1	-0.123218	normal	--	--	Molecular Function: sequence-specific DNA binding transcription factor activity (GO:0003700);; Cellular Component: nucleus (GO:0005634);; Biological Process: regulation of transcription, DNA-templated (GO:0006355);; Biological Process: defense response (GO:0006952);; Biological Process: gibberellin metabolic process (GO:0009685);; Molecular Function: sequence-specific DNA binding (GO:0043565);;	--	--	--	--	WRKY DNA -binding domain	Probable WRKY transcription factor 40 GN=WRKY40 OS=Arabidopsis thaliana (Mouse-ear cress) PE=1 SV=1	K	Transcription	PREDICTED: probable WRKY transcription factor 40-like [Setaria italica]
Seita.1G062200	Seita.1G062200	2.89689	424	2.55328	492	2.09223	345	4.97759	730	5.14737	903	3.15343	480	0.631419	-0.738908	normal	--	--	--	--	--	--	--	--	--	--	--	--
Seita.1G062300	Seita.1G062300	0.574994	5	0.74772	9	0.361956	4	1.16988	11	0.980124	11	1.3144	12	--	--	--	--	--	--	--	--	--	--	--	--	--	--	--
Seita.1G062400	Seita.1G062400	3.64488	634	2.13977	532	2.35828	494	2.73954	511	2.92537	542	2.89988	493	1	0.0930542	normal	[MG]	Cell wall/membrane/envelope biogenesis;; Carbohydrate transport and metabolism	Molecular Function: cinnamoyl-CoA reductase activity (GO:0016621);; Biological Process: cellular metabolic process (GO:0044237);; Molecular Function: coenzyme binding (GO:0050662);; Biological Process: oxidation-reduction process (GO:0055114);;	--	--	[V]	Defense mechanisms	NAD dependent epimerase/dehydratase family;; 3-beta hydroxysteroid dehydrogenase/isomerase family;; NADH(P)-binding;; Male sterility protein;; NmrA-like family;; short chain dehydrogenase;; Polysaccharide biosynthesis protein	Cinnamoyl-CoA reductase 1 GN=T24D18.5 OS=Arabidopsis thaliana (Mouse-ear cress) PE=1 SV=1	V	Defense mechanisms	PREDICTED: cinnamoyl-CoA reductase 1-like isoform X1 [Setaria italica]
Seita.1G062500	Seita.1G062500	1.66211	108	1.76384	151	1.86525	137	1.60527	105	1.34229	105	1.42753	97	0.981967	0.378155	normal	[E]	Amino acid transport and metabolism	Molecular Function: chorismate mutase activity (GO:0004106);; Biological Process: aromatic amino acid family biosynthetic process (GO:0009073);; Biological Process: chorismate metabolic process (GO:0046417);;	K01850|1.27613e-168|sita:101756378|chorismate mutase 2-like; K01850 chorismate mutase [EC:5.4.99.5] (A)	Phenylalanine, tyrosine and tryptophan biosynthesis (ko00400);; Biosynthesis of amino acids (ko01230)	[E]	Amino acid transport and metabolism	--	Chorismate mutase 2 GN=CM2 OS=Arabidopsis thaliana (Mouse-ear cress) PE=1 SV=1	E	Amino acid transport and metabolism	PREDICTED: chorismate mutase 2-like [Setaria italica]
Seita.1G062600	Seita.1G062600	1.20107	94	0.722012	75	0.849691	75	0	0	0	0	0	0	1.69392e-13	Inf	up	--	--	Molecular Function: N-acetyltransferase activity (GO:0008080);; Biological Process: response to hormone (GO:0009725);; Biological Process: developmental process (GO:0032502);; Biological Process: single-organism cellular process (GO:0044763);;	--	--	--	--	Acetyltransferase (GNAT) family	Probable N-acetyltransferase HLS1-like GN=At2g23060 OS=Arabidopsis thaliana (Mouse-ear cress) PE=2 SV=1	R	General function prediction only	PREDICTED: uncharacterized protein LOC101782471 [Setaria italica]
Seita.1G062700	Seita.1G062700	60.5782	2640	51.8203	2976	51.9523	2550	45.5883	1994	38.3199	2005	35.3547	1605	0.810092	0.544875	normal	[S]	Function unknown	Cellular Component: chloroplast thylakoid membrane (GO:0009535);; Cellular Component: chloroplast stroma (GO:0009570);; Cellular Component: chloroplast envelope (GO:0009941);;	--	--	--	--	YbaB/EbfC DNA-binding family	--	S	Function unknown	PREDICTED: uncharacterized protein LOC101757069 [Setaria italica]
Seita.1G062800	Seita.1G062800	0	0	0	0	0	0	0	0	0	0	0	0	--	--	--	--	--	--	--	--	--	--	--	--	--	--	--
Seita.1G062900	Seita.1G062900	0.457246	19	0.88176	48	1.08664	51	1.28539	53	1.42724	71	2.26672	97	0.691279	-0.870289	normal	--	--	--	--	--	--	--	--	--	--	--	--
Seita.1G063000	Seita.1G063000	0	0	0.106099	3	0.083043	2	0.155344	4	0.079251	2	0	0	--	--	--	--	--	--	--	--	--	--	--	--	--	--	--
Seita.1G063100	Seita.1G063100	0	0	0	0	0	0	0	0	0	0	0	0	--	--	--	--	--	--	--	--	--	--	--	--	--	--	--
Seita.1G063200	Seita.1G063200	49.4174	4007	28.8337	3051	26.6646	2398	52.8513	4248	49.4783	4735	36.6226	3061	0.946889	-0.363801	normal	[T]	Signal transduction mechanisms	Molecular Function: protein serine/threonine phosphatase activity (GO:0004722);; Biological Process: protein dephosphorylation (GO:0006470);; Molecular Function: metal ion binding (GO:0046872);;	K17499|0|sita:101757462|probable protein phosphatase 2C 11-like; K17499 protein phosphatase 1G [EC:3.1.3.16] (A)	--	[T]	Signal transduction mechanisms	Protein phosphatase 2C;; Protein phosphatase 2C;; Stage II sporulation protein E (SpoIIE)	Probable protein phosphatase 2C 11 OS=Oryza sativa subsp. japonica (Rice) PE=2 SV=1	T	Signal transduction mechanisms	PREDICTED: probable protein phosphatase 2C 11-like isoform X1 [Setaria italica]
Seita.1G063300	Seita.1G063300	19.4283	2469	13.0961	2139	11.3324	1591	13.2436	1658	12.8542	1912	13.8392	1805	0.992981	0.187072	normal	--	--	Molecular Function: nucleotide binding (GO:0000166);; Molecular Function: RNA binding (GO:0003723);; Cellular Component: mitochondrion (GO:0005739);; Biological Process: RNA processing (GO:0006396);;	K12842|0|sita:101758144|U2 snRNP-associated SURP motif-containing protein-like; K12842 U2-associated protein SR140 (A)	Spliceosome (ko03040)	[R]	General function prediction only	Surp module;; RNA recognition motif. (a.k.a. RRM, RBD, or RNP domain);; cwf21 domain;; RNA recognition motif (a.k.a. RRM, RBD, or RNP domain)	Polyadenylate-binding protein RBP47 GN=RBP47 OS=Nicotiana plumbaginifolia (Leadwort-leaved tobacco) PE=1 SV=1	A	RNA processing and modification	PREDICTED: U2 snRNP-associated SURP motif-containing protein-like isoform X1 [Setaria italica]
Seita.1G063400	Seita.1G063400	10.9317	1822	16.3334	3587	16.657	3126	18.451	3085	18.7771	3756	17.6562	3065	0.992167	-0.186664	normal	--	--	Biological Process: autophagy (GO:0006914);; Molecular Function: zinc ion binding (GO:0008270);; Cellular Component: plasmodesma (GO:0009506);;	--	--	--	--	Autophagy-related protein 11	--	S	Function unknown	hypothetical protein SORBIDRAFT_04g005420 [Sorghum bicolor]
Seita.1G063500	Seita.1G063500	2.87026	220	1.57608	159	1.93891	167	2.37457	182	2.53068	232	2.85863	228	0.993602	-0.242573	normal	--	--	Cellular Component: mitochondrion (GO:0005739);; Cellular Component: plastid (GO:0009536);;	--	--	--	--	Domain of unknown function (DUF2828)	--	S	Function unknown	PREDICTED: uncharacterized protein LOC101759763 [Setaria italica]
Seita.1G063600	Seita.1G063600	13.535	1342	7.0192	918	8.31539	929	15.0022	1493	14.6113	1740	13.8698	1433	0.783847	-0.560354	normal	[R]	General function prediction only	Cellular Component: integral component of membrane (GO:0016021);;	K07297|0|sita:101760177|ADIPOR-like receptor CG5315-like; K07297 adiponectin receptor (A)	--	[RT]	General function prediction only;; Signal transduction mechanisms	Haemolysin-III related	Heptahelical transmembrane protein ADIPOR2 GN=P0544B02.25 OS=Oryza sativa subsp. japonica (Rice) PE=2 SV=1	T	Signal transduction mechanisms	PREDICTED: ADIPOR-like receptor CG5315-like [Setaria italica]
Seita.1G063700	Seita.1G063700	0.290422	18	0.036633	3	0.123902	9	0.116294	8	0.082454	6	0.061643	4	--	--	--	--	--	Molecular Function: sequence-specific DNA binding transcription factor activity (GO:0003700);; Cellular Component: cytosol (GO:0005829);; Biological Process: regulation of transcription, DNA-templated (GO:0006355);; Biological Process: response to fungus (GO:0009620);; Biological Process: stamen development (GO:0048443);;	--	--	[R]	General function prediction only	Tub family	Tubby-like protein 4 OS=Oryza sativa subsp. japonica (Rice) PE=3 SV=2	R	General function prediction only	PREDICTED: tubby-like protein 4-like [Setaria italica]
Seita.1G063800	Seita.1G063800	2.76945	191	1.42452	130	1.25153	98	1.15248	80	1.08801	91	1.03794	75	0.829691	0.741174	normal	[O]	Posttranslational modification, protein turnover, chaperones	Molecular Function: damaged DNA binding (GO:0003684);; Cellular Component: nucleus (GO:0005634);; Biological Process: nucleotide-excision repair (GO:0006289);; Molecular Function: ubiquitin binding (GO:0043130);; Biological Process: proteasome-mediated ubiquitin-dependent protein catabolic process (GO:0043161);; Molecular Function: proteasome binding (GO:0070628);;	K10839|0|sita:101761391|putative DNA repair protein RAD23-1-like; K10839 UV excision repair protein RAD23 (A)	Nucleotide excision repair (ko03420);; Protein processing in endoplasmic reticulum (ko04141)	[L]	Replication, recombination and repair	UBA/TS-N domain;; XPC-binding domain;; Ubiquitin family;; Ubiquitin-2 like Rad60 SUMO-like	Ubiquitin receptor RAD23b GN=F20B17.8 OS=Arabidopsis thaliana (Mouse-ear cress) PE=1 SV=3	L	Replication, recombination and repair	PREDICTED: putative DNA repair protein RAD23-1-like [Setaria italica]
Seita.1G063900	Seita.1G063900	0	0	0	0	0	0	0	0	0	0	0	0	--	--	--	[F]	Nucleotide transport and metabolism	Cellular Component: mitochondrion (GO:0005739);;	--	--	[F]	Nucleotide transport and metabolism	Glutamine amidotransferase class-I;; Homoserine O-succinyltransferase;; Peptidase C26	--	F	Nucleotide transport and metabolism	PREDICTED: putative glutamine amidotransferase-like protein C13C5.04-like [Setaria italica]
Seita.1G064000	Seita.1G064000	0.090854	5	0	0	0	0	0	0	0	0	0	0	--	--	--	[F]	Nucleotide transport and metabolism	Cellular Component: mitochondrion (GO:0005739);;	--	--	[F]	Nucleotide transport and metabolism	Glutamine amidotransferase class-I;; Homoserine O-succinyltransferase;; Peptidase C26	--	F	Nucleotide transport and metabolism	PREDICTED: putative glutamine amidotransferase-like protein C13C5.04-like [Setaria italica]
Seita.1G064100	Seita.1G064100	9.51916	681	0.898173	85	0.855897	69	0.932396	67	1.21572	105	0.82891	62	0.849296	1.74838	normal	[F]	Nucleotide transport and metabolism	Cellular Component: mitochondrion (GO:0005739);;	--	--	[F]	Nucleotide transport and metabolism	Glutamine amidotransferase class-I;; Peptidase C26	--	F	Nucleotide transport and metabolism	PREDICTED: putative glutamine amidotransferase-like protein C13C5.04-like [Setaria italica]
Seita.1G064200	Seita.1G064200	27.8208	1340	33.0273	2098	28.8695	1568	33.6066	1632	28.1817	1642	30.5049	1537	1	0.0624	normal	[R]	General function prediction only	Cellular Component: cytosol (GO:0005829);; Molecular Function: phosphoric diester hydrolase activity (GO:0008081);; Biological Process: metabolic process (GO:0008152);; Cellular Component: plastid (GO:0009536);; Molecular Function: metal ion binding (GO:0046872);;	K07023|2.09851e-128|sita:101762598|HD domain-containing protein 2-like; K07023 putative hydrolases of HD superfamily (A)	--	[R]	General function prediction only	HD domain;; HD domain	--	R	General function prediction only	PREDICTED: HD domain-containing protein 2-like [Setaria italica]
Seita.1G064300	Seita.1G064300	1.13491	104	0.4917	60	0.443235	45	0.598642	57	0.590538	65	0.423094	40	0.981174	0.33795	normal	[RTKL]	General function prediction only;; Signal transduction mechanisms;; Transcription;; Replication, recombination and repair	Molecular Function: protein serine/threonine kinase activity (GO:0004674);; Molecular Function: ATP binding (GO:0005524);; Biological Process: protein phosphorylation (GO:0006468);;	K08835|0|sita:101763952|serine/threonine-protein kinase fray2-like; K08835 serine/threonine-protein kinase OSR1/STK39 [EC:2.7.11.1] (A)	--	[T]	Signal transduction mechanisms	Protein kinase domain;; Protein tyrosine kinase;; Kinase-like	Serine/threonine-protein kinase BLUS1 GN=BLUS1 OS=Arabidopsis thaliana (Mouse-ear cress) PE=1 SV=1	T	Signal transduction mechanisms	PREDICTED: serine/threonine-protein kinase fray2-like [Setaria italica]
Seita.1G064400	Seita.1G064400	29.053	2626	29.0085	3455	30.3446	3089	4.05361	368	3.63356	395	5.85919	552	3.41184e-07	2.80101	up	--	--	Molecular Function: iron ion binding (GO:0005506);; Cellular Component: plasma membrane (GO:0005886);; Biological Process: fatty acid biosynthetic process (GO:0006633);; Biological Process: cuticle hydrocarbon biosynthetic process (GO:0006723);; Biological Process: wax biosynthetic process (GO:0010025);; Cellular Component: integral component of membrane (GO:0016021);; Molecular Function: oxidore…	--	--	--	--	WAX2 C-terminal domain;; Fatty acid hydroxylase superfamily	Protein ECERIFERUM 3 GN=MTI20.3 OS=Arabidopsis thaliana (Mouse-ear cress) PE=1 SV=1	I	Lipid transport and metabolism	PREDICTED: protein ECERIFERUM 3-like isoform X3 [Setaria italica]
Seita.1G064500	Seita.1G064500	1.14196	51	1.33894	79	1.30204	65	0.194565	9	0.073223	4	0.176521	9	5.59864e-05	3.12853	up	--	--	--	--	--	--	--	--	--	--	--	--
Seita.1G064600	Seita.1G064600	0	0	0	0	0	0	0	0	0	0	0	0	--	--	--	--	--	Cellular Component: nucleus (GO:0005634);; Molecular Function: protein dimerization activity (GO:0046983);;	--	--	--	--	--	--	S	Function unknown	PREDICTED: transcription factor bHLH149-like [Setaria italica]
Seita.1G064700	Seita.1G064700	6.85015	478	0.580953	54	0.477545	38	1.03138	73	0.675002	57	1.34801	98	0.924502	1.19179	normal	--	--	Molecular Function: zinc ion binding (GO:0008270);;	--	--	[O]	Posttranslational modification, protein turnover, chaperones	Ring finger domain;; RING-H2 zinc finger;; Zinc finger, C3HC4 type (RING finger);; Zinc finger, C3HC4 type (RING finger);; Zinc finger, C3HC4 type (RING finger)	RING-H2 finger protein ATL45 GN=F15J1.50 OS=Arabidopsis thaliana (Mouse-ear cress) PE=2 SV=1	O	Posttranslational modification, protein turnover, chaperones	PREDICTED: RING-H2 finger protein ATL56-like [Setaria italica]
Seita.1G064800	Seita.1G064800	10.3844	978	6.66584	827	6.4505	684	9.16116	866	7.71425	872	9.06259	889	1	-0.0966519	normal	[U]	Intracellular trafficking, secretion, and vesicular transport	Cellular Component: nucleus (GO:0005634);; Cellular Component: cytosol (GO:0005829);; Cellular Component: plasma membrane (GO:0005886);;	--	--	[U]	Intracellular trafficking, secretion, and vesicular transport	VID27 cytoplasmic protein	Protein CYPRO4 GN=CYPRO4 OS=Cynara cardunculus (Cardoon) PE=2 SV=1	U	Intracellular trafficking, secretion, and vesicular transport	PREDICTED: protein CYPRO4-like [Setaria italica]
Seita.1G064900	Seita.1G064900	47.0588	1804	21.5576	1037	24.0385	1042	32.4658	1275	29.7333	1400	35.625	1427	1	-0.106112	normal	[U]	Intracellular trafficking, secretion, and vesicular transport	Cellular Component: endoplasmic reticulum membrane (GO:0005789);; Cellular Component: plasma membrane (GO:0005886);; Biological Process: protein targeting (GO:0006605);; Molecular Function: P-P-bond-hydrolysis-driven protein transmembrane transporter activity (GO:0015450);; Cellular Component: integral component of membrane (GO:0016021);;	K07342|2.63088e-31|sbi:SORBI_04g005280|SORBIDRAFT_04g005280, Sb04g005280; hypothetical protein; K07342 protein transport protein SEC61 subunit gamma and related proteins (A)	Protein export (ko03060);; Protein processing in endoplasmic reticulum (ko04141);; Phagosome (ko04145)	[U]	Intracellular trafficking, secretion, and vesicular transport	SecE/Sec61-gamma subunits of protein translocation complex	Protein transport protein Sec61 subunit gamma OS=Oryza sativa subsp. japonica (Rice) PE=3 SV=1	U	Intracellular trafficking, secretion, and vesicular transport	hypothetical protein SORBIDRAFT_04g005280 [Sorghum bicolor]
Seita.1G065000	Seita.1G065000	1.45428	16	0.387791	6	0.437165	6	1.12446	12	1.18117	15	0.59585	7	--	--	--	--	--	Cellular Component: intracellular membrane-bounded organelle (GO:0043231);; Cellular Component: cytoplasmic part (GO:0044444);;	--	--	--	--	--	--	R	General function prediction only	PREDICTED: uncharacterized protein LOC103636008 isoform X1 [Zea mays]
Seita.1G065100	Seita.1G065100	0.419705	16	0	0	0	0	0	0	0	0	0.050912	2	--	--	--	--	--	--	--	--	--	--	--	--	--	--	--
Seita.1G065200	Seita.1G065200	2.75164	129	0.064962	5	0	0	0.029574	2	0	0	0.143667	7	--	--	--	--	--	--	--	--	--	--	--	Protein GLUTAMINE DUMPER 4 GN=GDU4 OS=Arabidopsis thaliana (Mouse-ear cress) PE=2 SV=1	S	Function unknown	PREDICTED: protein GLUTAMINE DUMPER 4-like [Setaria italica]
Seita.1G065300	Seita.1G065300	387.028	25801	137.645	12123	146.479	11003	83.9663	5614	105.849	8495	137.02	9500	0.423104	1.01108	normal	--	--	Cellular Component: mitochondrion (GO:0005739);; Cellular Component: plastid (GO:0009536);;	--	--	[K]	Transcription	CCT motif;; B-box zinc finger	Zinc finger protein CONSTANS-LIKE 5 GN=COL5 OS=Arabidopsis thaliana (Mouse-ear cress) PE=2 SV=2	K	Transcription	PREDICTED: zinc finger protein CONSTANS-LIKE 5-like [Setaria italica]
Seita.1G065400	Seita.1G065400	11.0126	805	1.60397	149	1.6186	132	2.14168	156	1.51269	132	1.787	136	0.839816	1.2621	normal	[RTKL]	General function prediction only;; Signal transduction mechanisms;; Transcription;; Replication, recombination and repair	Molecular Function: protein serine/threonine kinase activity (GO:0004674);; Molecular Function: ATP binding (GO:0005524);; Biological Process: protein phosphorylation (GO:0006468);; Biological Process: signal transduction (GO:0007165);;	K07198|0|sita:101768025|CBL-interacting serine/threonine-protein kinase 21-like; K07198 5'-AMP-activated protein kinase, catalytic alpha subunit [EC:2.7.11.11] (A)	Regulation of autophagy (ko04140)	[T]	Signal transduction mechanisms	Protein kinase domain;; Protein tyrosine kinase;; NAF domain;; Kinase-like;; RIO1 family	CBL-interacting serine/threonine-protein kinase 21 GN=MUA2.22 OS=Arabidopsis thaliana (Mouse-ear cress) PE=1 SV=1	T	Signal transduction mechanisms	PREDICTED: LOW QUALITY PROTEIN: CBL-interacting serine/threonine-protein kinase 21-like [Setaria italica]
Seita.1G065500	Seita.1G065500	22.8326	2188	13.2195	1667	12.6753	1365	12.7581	1225	11.9904	1376	10.1178	1009	0.813272	0.516942	normal	[C]	Energy production and conversion	Cellular Component: mitochondrion (GO:0005739);; Cellular Component: chloroplast (GO:0009507);; Molecular Function: phosphotransferase activity, alcohol group as acceptor (GO:0016773);; Molecular Function: carbohydrate kinase activity (GO:0019200);; Biological Process: carbohydrate phosphorylation (GO:0046835);;	--	--	[G]	Carbohydrate transport and metabolism	FGGY family of carbohydrate kinases, C-terminal domain;; FGGY family of carbohydrate kinases, N-terminal domain	--	G	Carbohydrate transport and metabolism	PREDICTED: FGGY carbohydrate kinase domain-containing protein-like isoform X2 [Setaria italica]
Seita.1G065600	Seita.1G065600	82.5395	7155	32.2104	3680	30.0827	2939	49.9171	4349	49.1344	5130	39.8959	3612	1	0.0388389	normal	--	--	Molecular Function: calmodulin binding (GO:0005516);;	--	--	--	--	Calmodulin binding protein-like	--	R	General function prediction only	PREDICTED: uncharacterized protein LOC101768423 [Setaria italica]
Seita.1G065700	Seita.1G065700	49.8668	2641	8.40431	587	10.7776	643	4.36478	232	4.05313	258	2.74423	152	0.315996	2.53056	normal	--	--	Cellular Component: plasma membrane (GO:0005886);; Cellular Component: integral component of membrane (GO:0016021);; Cellular Component: cytoplasmic membrane-bounded vesicle (GO:0016023);;	--	--	--	--	Domain of unknown function (DUF588)	CASP-like protein 2C4 OS=Zea mays (Maize) PE=2 SV=1	S	Function unknown	PREDICTED: CASP-like protein 9-like [Setaria italica]
Seita.1G065800	Seita.1G065800	10.6731	838	10.545	1091	18.4764	1633	32.3724	2549	47.8654	4508	91.6483	7490	0.101824	-2.00129	normal	[IQ]	Lipid transport and metabolism;; Secondary metabolites biosynthesis, transport and catabolism	Molecular Function: ATP binding (GO:0005524);; Biological Process: phenylpropanoid metabolic process (GO:0009698);; Molecular Function: 4-coumarate-CoA ligase activity (GO:0016207);;	K01904|0|sita:101769243|probable 4-coumarate--CoA ligase 3-like; K01904 4-coumarate--CoA ligase [EC:6.2.1.12] (A)	Ubiquinone and other terpenoid-quinone biosynthesis (ko00130);; Phenylalanine metabolism (ko00360);; Phenylpropanoid biosynthesis (ko00940)	[I]	Lipid transport and metabolism	AMP-binding enzyme;; AMP-binding enzyme C-terminal domain	Probable 4-coumarate--CoA ligase 3 OS=Oryza sativa subsp. japonica (Rice) PE=2 SV=1	H	Coenzyme transport and metabolism	PREDICTED: probable 4-coumarate--CoA ligase 3-like [Setaria italica]
Seita.1G065900	Seita.1G065900	26.1632	672	12.0203	407	13.4155	389	14.385	371	12.9915	401	14.0673	377	0.964848	0.32824	normal	[K]	Transcription	Molecular Function: nucleic acid binding (GO:0003676);; Cellular Component: nucleolus (GO:0005730);; Biological Process: RNA processing (GO:0006396);; Cellular Component: ribonucleoprotein complex (GO:0030529);;	K11098|6.71303e-57|sita:101776784|probable small nuclear ribonucleoprotein F-like; K11098 small nuclear ribonucleoprotein F (A)	Spliceosome (ko03040)	[A]	RNA processing and modification	LSM domain	Probable small nuclear ribonucleoprotein F GN=At4g30220 OS=Arabidopsis thaliana (Mouse-ear cress) PE=2 SV=1	A	RNA processing and modification	PREDICTED: probable small nuclear ribonucleoprotein F-like [Setaria italica]
Seita.1G066000	Seita.1G066000	0.074888	3	0	0	0	0	0	0	0.023809	1	0.008962	1	--	--	--	--	--	--	--	--	--	--	Fasciclin domain	--	R	General function prediction only	PREDICTED: fasciclin-like arabinogalactan protein 3-like [Setaria italica]
Seita.1G066100	Seita.1G066100	0	0	0.02929	2	0	0	0	0	0	0	0.015561	1	--	--	--	--	--	--	--	--	--	--	--	--	S	Function unknown	hypothetical protein SORBIDRAFT_04g005185 [Sorghum bicolor]
Seita.1G066200	Seita.1G066200	0	0	0	0	0	0	0	0	0	0	0	0	--	--	--	--	--	Cellular Component: nucleus (GO:0005634);; Biological Process: regulation of mitotic cell cycle (GO:0007346);; Molecular Function: zinc ion binding (GO:0008270);; Biological Process: leaf morphogenesis (GO:0009965);; Biological Process: seed dormancy process (GO:0010162);; Biological Process: vegetative to reproductive phase transition of meristem (GO:0010228);; Biological Process: histone monoub…	K10696|4.26592e-137|sita:101767187|E3 ubiquitin-protein ligase BRE1-like 2-like; K10696 E3 ubiquitin-protein ligase BRE1 [EC:6.3.2.19] (A)	--	[O]	Posttranslational modification, protein turnover, chaperones	Zinc finger, C3HC4 type (RING finger);; Zinc finger, C3HC4 type (RING finger);; Zinc finger, C3HC4 type (RING finger);; Ring finger domain	E3 ubiquitin-protein ligase BRE1-like 2 OS=Oryza sativa subsp. japonica (Rice) PE=2 SV=1	O	Posttranslational modification, protein turnover, chaperones	PREDICTED: E3 ubiquitin-protein ligase BRE1-like 2-like [Setaria italica]
Seita.1G066300	Seita.1G066300	0	0	0	0	0	0	0	0	0	0	0	0	--	--	--	--	--	--	--	--	--	--	SBP domain	Squamosa promoter-binding-like protein 5 GN=P0504A05.16 OS=Oryza sativa subsp. japonica (Rice) PE=2 SV=1	K	Transcription	PREDICTED: squamosa promoter-binding-like protein 5-like isoform X1 [Setaria italica]
Seita.1G066400	Seita.1G066400	1.69942	99	8.36041	639	9.91494	647	14.2813	831	12.9417	901	16.607	1003	0.307322	-0.927954	normal	[G]	Carbohydrate transport and metabolism	Cellular Component: plasma membrane (GO:0005886);; Biological Process: carbohydrate metabolic process (GO:0005975);; Cellular Component: plant-type cell wall (GO:0009505);; Biological Process: response to abscisic acid (GO:0009737);; Molecular Function: isomerase activity (GO:0016853);; Molecular Function: carbohydrate binding (GO:0030246);;	K01792|0|sita:101771518|putative glucose-6-phosphate 1-epimerase-like; K01792 glucose-6-phosphate 1-epimerase [EC:5.1.3.15] (A)	Glycolysis / Gluconeogenesis (ko00010)	[G]	Carbohydrate transport and metabolism	Aldose 1-epimerase	Putative glucose-6-phosphate 1-epimerase OS=Cenchrus ciliaris (Buffelgrass) PE=2 SV=1	G	Carbohydrate transport and metabolism	PREDICTED: putative glucose-6-phosphate 1-epimerase-like isoform X1 [Setaria italica]
Seita.1G066500	Seita.1G066500	17.1842	1480	29.1135	3304	20.1909	1959	14.7396	1274	13.0087	1345	13.8781	1246	0.471917	0.810419	normal	--	--	Cellular Component: plastid (GO:0009536);;	--	--	[D]	Cell cycle control, cell division, chromosome partitioning	Sad1 / UNC-like C-terminal	--	D	Cell cycle control, cell division, chromosome partitioning	PREDICTED: SUN domain-containing protein 1-like [Setaria italica]
Seita.1G066600	Seita.1G066600	15.5689	826	6.75438	472	7.6472	457	13.3134	708	11.3708	724	10.5478	583	0.993602	-0.224737	normal	[J]	Translation, ribosomal structure and biogenesis	Molecular Function: rRNA (adenine-N6,N6-)-dimethyltransferase activity (GO:0000179);; Biological Process: cell fate specification (GO:0001708);; Cellular Component: nucleolus (GO:0005730);; Biological Process: rRNA methylation (GO:0031167);; Biological Process: cell division (GO:0051301);;	K14191|0|sita:101772584|probable dimethyladenosine transferase-like; K14191 18S rRNA (adenine1779-N6/adenine1780-N6)-dimethyltransferase [EC:2.1.1.183] (A)	--	[A]	RNA processing and modification	Ribosomal RNA adenine dimethylase;; Methyltransferase domain;; Methyltransferase domain;; Methyltransferase domain	--	J	Translation, ribosomal structure and biogenesis	PREDICTED: probable dimethyladenosine transferase-like [Setaria italica]
Seita.1G066700	Seita.1G066700	13.9828	746	7.26195	511	8.35072	502	13.4355	720	12.5389	803	10.9449	609	0.977608	-0.289374	normal	[J]	Translation, ribosomal structure and biogenesis	Molecular Function: rRNA (adenine-N6,N6-)-dimethyltransferase activity (GO:0000179);; Biological Process: cell fate specification (GO:0001708);; Cellular Component: nucleolus (GO:0005730);; Biological Process: rRNA methylation (GO:0031167);; Biological Process: cell division (GO:0051301);;	K14191|0|sita:101772992|probable dimethyladenosine transferase-like; K14191 18S rRNA (adenine1779-N6/adenine1780-N6)-dimethyltransferase [EC:2.1.1.183] (A)	--	[A]	RNA processing and modification	Ribosomal RNA adenine dimethylase;; Methyltransferase domain;; Methyltransferase domain;; Methyltransferase domain	--	A	RNA processing and modification	PREDICTED: probable dimethyladenosine transferase-like [Setaria italica]
Seita.1G066800	Seita.1G066800	1.85383	51	1.96192	71	1.93913	60	2.57642	71	2.66236	88	1.17686	34	1	-0.0558839	normal	--	--	--	--	--	--	--	--	--	--	--	--
Seita.1G066900	Seita.1G066900	0	0	0	0	0	0	0	0	0	0	0	0	--	--	--	--	--	--	--	--	--	--	--	--	R	General function prediction only	PREDICTED: uncharacterized protein LOC103626687 [Zea mays]
Seita.1G067000	Seita.1G067000	14.6505	2444	19.5369	4300	19.6555	3698	12.8078	2160	14.5429	2942	22.4508	3965	0.993602	0.216262	normal	[P]	Inorganic ion transport and metabolism	Molecular Function: calcium-transporting ATPase activity (GO:0005388);; Molecular Function: calmodulin binding (GO:0005516);; Molecular Function: ATP binding (GO:0005524);; Cellular Component: integral component of membrane (GO:0016021);; Molecular Function: metal ion binding (GO:0046872);; Biological Process: calcium ion transmembrane transport (GO:0070588);;	K01537|0|sita:101773685|calcium-transporting ATPase 8, plasma membrane-type-like; K01537 Ca2+-transporting ATPase [EC:3.6.3.8] (A)	--	[P]	Inorganic ion transport and metabolism	E1-E2 ATPase;; Cation transporting ATPase, C-terminus;; haloacid dehalogenase-like hydrolase;; Ca2+-ATPase N terminal autoinhibitory domain;; haloacid dehalogenase-like hydrolase;; Cation transporter/ATPase, N-terminus;; Putative hydrolase of sodium-potassium ATPase alpha subunit;; haloacid dehalogenase-like hydrolase	Calcium-transporting ATPase 8, plasma membrane-type GN=ACA8 OS=Arabidopsis thaliana (Mouse-ear cress) PE=1 SV=1	P	Inorganic ion transport and metabolism	PREDICTED: calcium-transporting ATPase 8, plasma membrane-type-like isoform X1 [Setaria italica]
Seita.1G067100	Seita.1G067100	0	0	0	0	0	0	0	0	0	0	0	0	--	--	--	--	--	--	--	--	--	--	--	--	--	--	--
Seita.1G067200	Seita.1G067200	26.5391	853	11.5608	490	12.7367	462	26.9093	868	21.5399	832	20.1715	676	0.923617	-0.424641	normal	--	--	--	--	--	[S]	Function unknown	Eukaryotic protein of unknown function (DUF872)	--	S	Function unknown	PREDICTED: transmembrane protein 230 [Brachypodium distachyon]
Seita.1G067300	Seita.1G067300	3.19816	431	3.77884	671	3.00148	456	1.84482	250	2.00412	324	2.018	284	0.584487	0.867116	normal	[RTKL]	General function prediction only;; Signal transduction mechanisms;; Transcription;; Replication, recombination and repair	Molecular Function: protein kinase activity (GO:0004672);; Molecular Function: ATP binding (GO:0005524);; Cellular Component: mitochondrion (GO:0005739);; Cellular Component: plasma membrane (GO:0005886);; Biological Process: protein phosphorylation (GO:0006468);; Cellular Component: integral component of membrane (GO:0016021);;	--	--	--	--	Protein tyrosine kinase;; Protein kinase domain;; Leucine Rich repeats (2 copies);; Leucine Rich Repeat;; Leucine rich repeat;; Leucine rich repeat N-terminal domain	Protein STRUBBELIG-RECEPTOR FAMILY 3 (Precursor) GN=SRF3 OS=Arabidopsis thaliana (Mouse-ear cress) PE=2 SV=1	T	Signal transduction mechanisms	PREDICTED: protein STRUBBELIG-RECEPTOR FAMILY 3-like [Setaria italica]
Seita.1G067400	Seita.1G067400	1.54216	248	46.2109	9793	49.6014	8984	65.6743	10598	62.3646	12040	49.8763	8356	0.771156	-0.631425	normal	--	--	Biological Process: signal transduction (GO:0007165);; Molecular Function: zinc ion binding (GO:0008270);; Cellular Component: plastid (GO:0009536);; Biological Process: response to red or far red light (GO:0009639);; Biological Process: post-embryonic development (GO:0009791);; Biological Process: cellular response to light stimulus (GO:0071482);;	--	--	--	--	--	B-box zinc finger protein 32 {ECO:0000303|PubMed:19920209} OS=Arabidopsis thaliana (Mouse-ear cress) PE=1 SV=1	S	Function unknown	PREDICTED: uncharacterized protein LOC101775163 [Setaria italica]
Seita.1G067500	Seita.1G067500	0	0	0.065388	2	0	0	0	0	0	0	0	0	--	--	--	--	--	--	--	--	--	--	--	--	--	--	--
Seita.1G067600	Seita.1G067600	0	0	0	0	0	0	0.031389	2	0.000661	1	0.038112	2	--	--	--	--	--	--	--	--	[R]	General function prediction only	--	Protein indeterminate-domain 14 {ECO:0000303|PubMed:16784536} OS=Arabidopsis thaliana (Mouse-ear cress) PE=1 SV=1	R	General function prediction only	PREDICTED: uncharacterized protein LOC101784903 [Setaria italica]
Seita.1G067700	Seita.1G067700	16.656	1129	10.6828	954	11.7926	900	12.4903	849	9.98816	813	12.1077	855	0.981967	0.231555	normal	--	--	--	K13105|0|sita:101775562|proline-rich protein PRCC-like; K13105 proline-rich protein PRCC (A)	--	[D]	Cell cycle control, cell division, chromosome partitioning	Mitotic checkpoint regulator, MAD2B-interacting	--	D	Cell cycle control, cell division, chromosome partitioning	PREDICTED: proline-rich protein PRCC-like [Setaria italica]
Seita.1G067800	Seita.1G067800	113.337	3815	97.4408	4323	94.9034	3577	133.603	4477	125.952	5078	122.88	4282	0.984106	-0.238669	normal	--	--	Cellular Component: mitochondrial proton-transporting ATP synthase complex (GO:0005753);; Biological Process: glycolytic process (GO:0006096);; Biological Process: ubiquitin-dependent protein catabolic process (GO:0006511);; Biological Process: aerobic respiration (GO:0009060);; Cellular Component: plastid (GO:0009536);; Biological Process: photorespiration (GO:0009853);; Biological Process: resp…	--	--	--	--	--	--	S	Function unknown	PREDICTED: uncharacterized protein LOC101775975 [Setaria italica]
Seita.1G067900	Seita.1G067900	16.9825	481	9.60932	359	10.2211	330	9.18359	257	9.65897	327	9.38482	280	0.941491	0.426304	normal	[K]	Transcription	Molecular Function: nucleic acid binding (GO:0003676);; Cellular Component: nucleolus (GO:0005730);; Biological Process: RNA processing (GO:0006396);; Cellular Component: ribonucleoprotein complex (GO:0030529);;	K11098|6.71303e-57|sita:101776784|probable small nuclear ribonucleoprotein F-like; K11098 small nuclear ribonucleoprotein F (A)	Spliceosome (ko03040)	[A]	RNA processing and modification	LSM domain	Probable small nuclear ribonucleoprotein F GN=At4g30220 OS=Arabidopsis thaliana (Mouse-ear cress) PE=2 SV=1	A	RNA processing and modification	PREDICTED: probable small nuclear ribonucleoprotein F-like [Setaria italica]
Seita.1G068000	Seita.1G068000	0.676339	45	0.148228	13	0.091909	7	0.270387	18	0.232493	19	0.22873	16	--	--	--	--	--	Molecular Function: 1-phosphatidylinositol binding (GO:0005545);; Cellular Component: mitochondrion (GO:0005739);; Cellular Component: clathrin coat (GO:0030118);; Molecular Function: clathrin binding (GO:0030276);; Biological Process: clathrin coat assembly (GO:0048268);;	--	--	[TU]	Signal transduction mechanisms;; Intracellular trafficking, secretion, and vesicular transport	ANTH domain;; ENTH domain	Putative clathrin assembly protein At4g25940 GN=At4g25940 OS=Arabidopsis thaliana (Mouse-ear cress) PE=2 SV=1	F	Nucleotide transport and metabolism	PREDICTED: putative clathrin assembly protein At5g57200-like [Setaria italica]
Seita.1G068100	Seita.1G068100	5.5944	367	2.45275	232	2.91328	213	4.32161	289	4.47018	369	3.38729	240	0.999228	-0.158614	normal	--	--	Biological Process: intracellular protein transport (GO:0006886);; Molecular Function: zinc ion binding (GO:0008270);; Biological Process: positive regulation of cell proliferation (GO:0008284);; Biological Process: gravitropism (GO:0009630);; Biological Process: vesicle-mediated transport (GO:0016192);;	--	--	[U]	Intracellular trafficking, secretion, and vesicular transport	--	--	U	Intracellular trafficking, secretion, and vesicular transport	PREDICTED: vacuolar protein sorting-associated protein 18 homolog [Setaria italica]
Seita.1G068200	Seita.1G068200	6.77125	510	4.99899	496	5.39728	458	7.5482	570	6.61127	597	7.8071	612	0.979084	-0.286799	normal	--	--	Molecular Function: acetylglucosaminyltransferase activity (GO:0008375);; Cellular Component: membrane (GO:0016020);;	--	--	--	--	Core-2/I-Branching enzyme	--	S	Function unknown	PREDICTED: uncharacterized protein LOC101777196 [Setaria italica]
Seita.1G068300	Seita.1G068300	45.5855	3898	41.6288	4691	40.5839	3909	36.9455	3171	38.0091	3902	47.7608	4255	0.999228	0.141653	normal	[C]	Energy production and conversion	Cellular Component: plant-type vacuole (GO:0000325);; Molecular Function: ATP binding (GO:0005524);; Cellular Component: cell wall (GO:0005618);; Cellular Component: vacuolar membrane (GO:0005774);; Cellular Component: plasma membrane (GO:0005886);; Biological Process: Golgi organization (GO:0007030);; Biological Process: pollen development (GO:0009555);; Biological Process: response to salt stre…	K02145|0|sita:101778282|V-type proton ATPase catalytic subunit A-like; K02145 V-type H+-transporting ATPase subunit A [EC:3.6.3.14] (A)	Oxidative phosphorylation (ko00190);; Phagosome (ko04145)	[C]	Energy production and conversion	ATP synthase alpha/beta family, nucleotide-binding domain;; ATP synthase alpha/beta chain, C terminal domain;; ATP synthase alpha/beta family, beta-barrel domain	V-type proton ATPase catalytic subunit A OS=Daucus carota (Wild carrot) PE=2 SV=1	C	Energy production and conversion	PREDICTED: V-type proton ATPase catalytic subunit A-like [Setaria italica]
Seita.1G068400	Seita.1G068400	0.516631	24	0	0	0	0	0.020127	1	0.04986	3	0.041005	2	--	--	--	--	--	--	--	--	--	--	--	--	--	--	--
Seita.1G068500	Seita.1G068500	17.7307	1438	2.11081	226	2.02178	185	2.50217	204	2.54671	248	1.88812	160	0.839863	1.50878	normal	--	--	--	--	--	--	--	Protein of unknown function (DUF632);; Protein of unknown function (DUF630)	--	S	Function unknown	PREDICTED: uncharacterized protein LOC101785694 [Setaria italica]
Seita.1G068600	Seita.1G068600	18.5862	1343	24.4054	2322	20.4976	1667	25.7657	1868	36.0204	2476	15.0938	1136	1	-0.0117499	normal	--	--	Molecular Function: sequence-specific DNA binding transcription factor activity (GO:0003700);; Cellular Component: nucleus (GO:0005634);; Biological Process: regulation of transcription, DNA-templated (GO:0006355);; Molecular Function: sequence-specific DNA binding (GO:0043565);;	--	--	--	--	bZIP transcription factor;; Basic region leucine zipper;; Basic leucine-zipper C terminal	Basic leucine zipper 9 GN=F6A4.10 OS=Arabidopsis thaliana (Mouse-ear cress) PE=1 SV=1	K	Transcription	PREDICTED: basic leucine zipper 9-like isoform X4 [Setaria italica]
Seita.1G068700	Seita.1G068700	12.9345	1967	2.10218	430	2.09824	335	1.57871	247	0.882374	165	0.426602	70	0.485594	2.41819	normal	[P]	Inorganic ion transport and metabolism	Cellular Component: plasma membrane (GO:0005886);; Biological Process: response to salt stress (GO:0009651);; Molecular Function: potassium ion transmembrane transporter activity (GO:0015079);; Molecular Function: sodium ion transmembrane transporter activity (GO:0015081);; Cellular Component: integral component of membrane (GO:0016021);; Biological Process: sodium ion transmembrane transport (GO…	--	--	[P]	Inorganic ion transport and metabolism	Cation transport protein	Probable cation transporter HKT6 GN=OSJNBa0073A21.31 OS=Oryza sativa subsp. japonica (Rice) PE=2 SV=1	P	Inorganic ion transport and metabolism	PREDICTED: probable cation transporter HKT6-like isoform X1 [Setaria italica]
Seita.1G068800	Seita.1G068800	77.7726	3289	17.1987	959	12.8776	614	13.3186	566	16.6184	844	6.13947	271	0.667874	1.48226	normal	--	--	--	--	--	--	--	Protein of unknown function (DUF581)	--	S	Function unknown	PREDICTED: uncharacterized protein LOC101780165 [Setaria italica]
Seita.1G068900	Seita.1G068900	0	0	0	0	0	0	0	0	0	0	0	0	--	--	--	--	--	--	K08832|2.41795e-06|sita:101785448|serine/threonine-protein kinase SRPK-like; K08832 serine/threonine-protein kinase SRPK3 [EC:2.7.11.1] (A)	--	--	--	--	--	T	Signal transduction mechanisms	BnaA03g53140D [Brassica napus]
Seita.1G069000	Seita.1G069000	0.04417	5	0	0	0	0	0.085827	8	0.108351	12	0.041407	4	--	--	--	[RTKL]	General function prediction only;; Signal transduction mechanisms;; Transcription;; Replication, recombination and repair	Molecular Function: protein kinase activity (GO:0004672);; Molecular Function: ATP binding (GO:0005524);; Cellular Component: mitochondrion (GO:0005739);; Biological Process: protein phosphorylation (GO:0006468);; Cellular Component: integral component of membrane (GO:0016021);; Cellular Component: cytoplasmic membrane-bounded vesicle (GO:0016023);;	--	--	--	--	Protein tyrosine kinase;; Protein kinase domain;; Leucine rich repeat;; Leucine Rich Repeat;; Leucine Rich repeats (2 copies);; Leucine rich repeat;; Leucine rich repeat N-terminal domain	Probable LRR receptor-like serine/threonine-protein kinase At4g31250 (Precursor) GN=At4g31250 OS=Arabidopsis thaliana (Mouse-ear cress) PE=2 SV=1	T	Signal transduction mechanisms	PREDICTED: probably inactive leucine-rich repeat receptor-like protein kinase At1g50610-like [Setaria italica]
Seita.1G069100	Seita.1G069100	3.71211	226	0.744049	60	0.436102	30	1.11603	68	1.0037	74	0.754989	48	0.948896	0.65155	normal	--	--	Molecular Function: DNA binding (GO:0003677);; Molecular Function: chromatin binding (GO:0003682);; Molecular Function: sequence-specific DNA binding transcription factor activity (GO:0003700);; Cellular Component: nucleus (GO:0005634);; Cellular Component: plasmodesma (GO:0009506);; Biological Process: post-translational protein modification (GO:0043687);; Biological Process: positive regulation…	--	--	--	--	Myb/SANT-like DNA-binding domain	--	S	Function unknown	PREDICTED: trihelix transcription factor GTL1-like [Setaria italica]
Seita.1G069200	Seita.1G069200	21.4706	1675	16.4846	1681	15.9857	1366	17.4032	1330	16.5363	1520	17.8175	1446	0.999228	0.128799	normal	[RTKL]	General function prediction only;; Signal transduction mechanisms;; Transcription;; Replication, recombination and repair	Molecular Function: protein serine/threonine kinase activity (GO:0004674);; Molecular Function: protein tyrosine kinase activity (GO:0004713);; Molecular Function: ATP binding (GO:0005524);; Cellular Component: plasma membrane (GO:0005886);; Biological Process: protein phosphorylation (GO:0006468);;	--	--	[T]	Signal transduction mechanisms	Protein tyrosine kinase;; Protein kinase domain;; Kinase-like	Serine/threonine-protein kinase HT1 GN=HT1 OS=Arabidopsis thaliana (Mouse-ear cress) PE=1 SV=1	T	Signal transduction mechanisms	PREDICTED: serine/threonine-protein kinase HT1-like [Setaria italica]
Seita.1G069300	Seita.1G069300	8.94586	526	9.77834	758	9.88151	655	7.38575	436	6.35515	449	4.88848	300	0.699083	0.727152	normal	--	--	Molecular Function: DNA binding (GO:0003677);; Cellular Component: nucleus (GO:0005634);; Cellular Component: plastid (GO:0009536);;	--	--	--	--	SBP domain	Squamosa promoter-binding-like protein 11 OS=Oryza sativa subsp. japonica (Rice) PE=2 SV=1	K	Transcription	PREDICTED: squamosa promoter-binding-like protein 11-like [Setaria italica]
[truncated: 35,377 more rows]
