# Supplementary material for: Uncovering the mechanism of anthocyanin accumulation in a purple-leaved variety of foxtail millet (Setaria italica) by transcriptome analysis
Source: PeerJ. 2022 Oct 3;10:e14099. doi: 10.7717/peerj.14099 (PMC9536322; doi:10.7717/peerj.14099)
Supplement: Table S6 [file peerj-10-14099-s009.xlsx]

## Sheet: FRAP
FRAP standard curve
	Trolox（μmol·L-1）	AS
	10	0.107
	20	0.118
	40	0.14
	70	0.191
	150	0.25
	200	0.316
	250	0.387
	300	0.423
	350	0.491
	400	0.521
	500	0.624
	Seedling stage									Antioxidant Activity=（Trolox× Vsample × Vextraction）/（m×Vreaction）
	variety	AS	Trolox（μmol·L-1）	Antioxidant Activity	AVERAGE	STD
	B100-1	0.215	102.364	0.341212
	B100-2	0.198	86.9091	0.289697						m=0.2g	Vextraction=10ml	Vreaction=3ml	Vsample=0.2ml
	B100-3	0.197	86	0.286667	0.305859	0.0306545
	YG-1	0.152	45.0909	0.150303
	YG-2	0.145	38.7273	0.129091
	YG-3	0.16	52.3636	0.174545	0.151313	0.0227441
	Maturing stage	100-4/5/6 were five times dilution
	variety	AS	Trolox（μmol·L-1）	Antioxidant Activity	AVERAGE	STD
	B100-4	0.363	236.909	3.94848
	B100-5	0.352	226.909	3.78182
	B100-6	0.367	240.545	4.00909	3.91313	0.117689
	YG-1	0.384	256	0.853333
	YG-2	0.347	222.364	0.741212
	YG-3	0.358	232.364	0.774545	0.789697	0.0575758

## Sheet: soluble sugar
standard Curve
A620	m（μg）
0	0
0.056	20
0.212	40
0.297	60
0.401	80
0.491	100
Maturing stage	A620	soluble sugar content	average	STD
YG-1	1.6462	251.751
YG-2	1.65027	252.372	253.384	2.31158
YG-3	1.6742	256.029
B100-1	1.78607	273.121
B100-2	1.71707	262.579	268.033	5.28081
B100-3	1.75517	268.4
Seedling stage	A620	soluble sugar content	average	STD
YG-1	0.3258	50.0069
YG-2	0.353067	54.1729	52.1884	2.09001
YG-3	0.341367	52.3853
B100-1	0.587467	89.9869
B100-2	0.518167	79.3986	84.1147	5.38802
B100-3	0.541467	82.9586
