# Supplementary material for: Uncovering the mechanism of anthocyanin accumulation in a purple-leaved variety of foxtail millet (Setaria italica) by transcriptome analysis
Source: PeerJ. 2022 Oct 3;10:e14099. doi: 10.7717/peerj.14099 (PMC9536322; doi:10.7717/peerj.14099)
Supplement: Table S7 [file peerj-10-14099-s010.xlsx]

## Sheet: Sheet1
YG1-SS			B100-SS			YG1-MS			B100-MS
Gene	Cq Value		Gene	Cq Value		Gene	Cq Value		Gene	Cq Value
PAL-1	26.01		PAL-1	26.11		PAL-1	26.75		PAL-1	22.89
PAL-2	25.87		PAL-2	26.67		PAL-2	26.72		PAL-2	22.94
PAL-3	25.84		PAL-3	26.23		PAL-3	26.59		PAL-3	22.81
4CL-1	27.54		4CL-1	27.5		4CL-1	23.68		4CL-1	21.01
4CL-2	27.18		4CL-2	27.13		4CL-2	23.03		4CL-2	20.97
4CL-3	27.29		4CL-3	27.86		4CL-3	23.91		4CL-3	20.51
DFR-1	32.18		DFR-1	23.84		DFR-1	26.15		DFR-1	16.19
DFR-2	32.97		DFR-2	23.45		DFR-2	26.59		DFR-2	15.91
DFR-3	32.05		DFR-3	23.91		DFR-3	25.98		DFR-3	16.11
LDOX-1-1	30.94		LDOX-1-1	31.06		LDOX-1-1	27.11		LDOX-1-1	24.79
LDOX-1-2	30.89		LDOX-1-2	31.17		LDOX-1-2	27.28		LDOX-1-2	24.58
LDOX-1-3	31.25		LDOX-1-3	30.94		LDOX-1-3	27.04		LDOX-1-3	24.19
LDOX-2-1	32.81		LDOX-2-1	29.37		LDOX-2-1	26.75		LDOX-2-1	19.34
LDOX-2-2	32.29		LDOX-2-2	29.19		LDOX-2-2	26.68		LDOX-2-2	19.77
LDOX-2-3	32.48		LDOX-2-3	28.92		LDOX-2-3	26.63		LDOX-2-3	19.37
AT-1	33.17		AT-1	29.27		AT-1	31.01		AT-1	22.08
AT-2	32.78		AT-2	29.06		AT-2	30.96		AT-2	22.39
AT-3	32.68		AT-3	29.36		AT-3	31.82		AT-3	22.71
UFGT-1	31.56		UFGT-1	31.49		UFGT-1	30.27		UFGT-1	27.04
UFGT-2	31.18		UFGT-2	31.28		UFGT-2	30.73		UFGT-2	27.23
UFGT-3	32.01		UFGT-3	31.21		UFGT-3	30.89		UFGT-3	26.66
GT-1	26.19		GT-1	26.69		GT-1	18.51		GT-1	16.53
GT-2	26.61		GT-2	26.18		GT-2	18.65		GT-2	16.39
GT-3	26.51		GT-3	27.21		GT-3	18.83		GT-3	16.78
5GT-1	23.49		5GT-1	24.81		5GT-1	14.91		5GT-1	12.14
5GT-2	23.58		5GT-2	24.28		5GT-2	14.93		5GT-2	11.47
5GT-3	24.06		5GT-3	24.66		5GT-3	15.11		5GT-3	11.95
ACTIN-1	26.09		ACTIN-1	26.14		ACTIN-1	22.41		ACTIN-1	22.01
ACTIN-2	25.94		ACTIN-2	26.29		ACTIN-2	22.37		ACTIN-2	21.95
ACTIN-3	26.11		ACTIN-3	26.55		ACTIN-3	22.42		ACTIN-3	21.93
